# Supplementary material for: Synthesis and antibacterial activity of novel neamine derivatives: preponderant role of the substituent position on the neamine core
Source: Royal Society of Chemistry journal article supplement (doi:10.1039/c2ob07065k), 2012-01-01

**Synthesis and antibacterial activity of novel neamine derivatives:  
preponderant role of the substituent position on the neamine core.**

Nicolas Gernigon, Valérie Bordeau, Fabienne Berrée,  
Brice Felden,\* Bertrand Carboni \*

**Supporting Information**

|                                                                                                       |   |
|-------------------------------------------------------------------------------------------------------|---|
| Synthesis of neamine derivatives <b>3</b> and <b>4</b>                                                | 2 |
| Biological assays for compounds <b>8a+8b</b> and <b>8a</b>                                            | 3 |
| <sup>1</sup> H and <sup>13</sup> C NMR spectra of the neamine derivatives <b>1, 2</b> and <b>5-18</b> | 4 |

### 1,3,2',6'-Tetraazido-6,3',4'-tri-*O*-acetylneamine **3**<sup>1</sup>

To a solution of 1,3,2',6'-tetraazidoneamine (3 g, 7 mmol) in a mixture of CH<sub>2</sub>Cl<sub>2</sub>/pyridine (45 mL, 1:1 v/v) at 0°C was added Ac<sub>2</sub>O (45 mL). The reaction mixture was stirred at room temperature for 2h. It was then diluted with CH<sub>2</sub>Cl<sub>2</sub> (50 mL) and slowly poured on an ice-cold aqueous NaHCO<sub>3</sub> saturated solution under stirring. The layers were separated, the organic layer was washed with H<sub>2</sub>O (2 x 20 mL) and concentrated under reduced pressure. The residue was taken up in EtOAc (50 mL) and washed with aqueous NH<sub>4</sub>Cl (2 x 50 mL) and brine (50 mL). The organic layer was dried (MgSO<sub>4</sub>), concentrated *in vacuo*, and the residue was purified by column chromatography (EtOAc/cyclohexane 15% to 20%) to afford **3** (2.5 g, 4.6 mmol, 64%) (R<sub>f</sub> 0.5 EtOAc/cyclohexane 2:3) and the tetracetylated neamine derivative (0.8 g, 1.4 mmol, 20%). (R<sub>f</sub> 0.6 EtOAc/cyclohexane 2:3). <sup>1</sup>H NMR (300 MHz, CDCl<sub>3</sub>) δ 5.50 (dd, *J* = 9.4, 10.5 Hz, 1H, H-3'), 5.36 (d, *J* = 3.6 Hz, 1H, H-1'), 5.06 (dd, *J* = 9.3, 10.6 Hz, 1H, H-4'), 4.94 (dd, *J* = 8.7, 9.8 Hz, 1H, H-6), 4.35 (ddd, *J* = 2.8, 4.7, 10.1 Hz, 1H, H-5'), 3.75-3.63 (m, 2H, H-5, H-2'), 3.62-3.50 (m, 2H, H-1, H-4), 3.50-3.28 (m, 4H, H-6'<sub>eq</sub>, H-6'<sub>ax</sub>, H-3, OH), 2.42 (ddd, *J* = 4.2, 4.2, 13.6 Hz, 1H, H-2'<sub>eq</sub>), 2.19 (s, 3H, CH<sub>3</sub>), 2.11 (s, 3H, CH<sub>3</sub>), 2.07 (s, 3H, CH<sub>3</sub>), 1.62 (ddd, *J* = 13.5, 13.5, 13.5 Hz, 1H, H-2'<sub>ax</sub>); <sup>13</sup>C NMR (75 MHz, CDCl<sub>3</sub>) δ 169.9 (CH<sub>3</sub>-C=O), 169.7 (CH<sub>3</sub>-C=O), 169.2 (CH<sub>3</sub>-C=O), 98.3 (C-1'), 83.4, 74.4, 73.9, 70.8, 69.0, 68.8, 61.3 (C-N<sub>3</sub>), 57.8 (C-N<sub>3</sub>), 57.4 (C-N<sub>3</sub>), 50.4 (C-6'), 31.5 (C-2), 20.3 (CH<sub>3</sub>), 20.2 (CH<sub>3</sub>), 20.1 (CH<sub>3</sub>).

### 3',4'-Di-*O*-acetyl-1,3,2',6'-tetraazidoneamine **4**<sup>2</sup>

To a solution of **3** (4 g, 7.2 mmol) in THF (80 mL) was added NaOH 0.1N (90 mL, 9 mmol). After stirring at room temperature for 1h, quantitative conversion of the starting material was observed by TLC (40% EtOAc in cyclohexane). The solution was neutralized by saturated NH<sub>4</sub>Cl aqueous solution (20 mL). The remaining solvent was removed *in vacuo* and the aqueous layer was extracted with EtOAc (3 x 50 mL). The organic layers were combined, dried (MgSO<sub>4</sub>), and concentrated under reduced pressure to give a yellow oil which was purified by column chromatography on silica gel using 15% to 20% EtOAc in cyclohexane to obtain **4** (2.8 g, 5.4 mmol, 75%) (R<sub>f</sub> 0.4 EtOAc/cyclohexane 2:3). <sup>1</sup>H NMR (300 MHz, CDCl<sub>3</sub>) δ 5.51 (dd, *J* = 9.3, 10.5 Hz, 1H, H-3'), 5.36 (d, *J* = 3.6 Hz, 1H, H-1'), 5.07 (dd, *J* = 10.1, 10.1 Hz, 1H, H-4'), 4.36 (ddd, *J* = 2.7, 4.8, 10.2 Hz, 1H, H-5'), 3.79 (d, *J* = 2.6 Hz, 1H), 3.70 (dd, *J* = 3.6, 10.5 Hz, 1H, H-2'), 3.60-3.25 (m, 7H), 3.00 (s, 1H), 2.37 (ddd, *J* = 4.1, 4.1, 13.2 Hz, 1H, H-2'<sub>eq</sub>), 2.11 (s, 3H, CH<sub>3</sub>), 2.07 (s, 3H, CH<sub>3</sub>), 1.56 (ddd, *J* = 12.3, 12.3, 12.3 Hz, 1H, H-2'<sub>ax</sub>); <sup>13</sup>C NMR (75 MHz, CDCl<sub>3</sub>) δ 170.2 (C=O), 169.8 (C=O), 98.6 (C-1'), 82.7, 76.0, 75.5, 71.0, 69.4, 69.3, 61.6 (C-N<sub>3</sub>), 59.7 (C-N<sub>3</sub>), 58.6 (C-N<sub>3</sub>), 50.8 (C-6'), 31.8 (C-2), 20.7 (CH<sub>3</sub>), 20.6 (CH<sub>3</sub>); HRMS (electrospray) Calcd for C<sub>16</sub>H<sub>22</sub>N<sub>12</sub>O<sub>8</sub>Na [M+Na]<sup>+</sup>: 533.1581, found: 533.1565.

<sup>1</sup> W. K. C. Park, M. Auer, H. Jaksche, C-H. Wong, *J. Am. Chem. Soc.* 1996, **118**, 10150-10155.

<sup>2</sup> J. Li, J. Wang, P. G. Czyryca, H. Chang, T. W. Orsak, R. Evanson, C.-W. T. Chang, *Org. Lett.* 2004, **6**, 1381-1384.

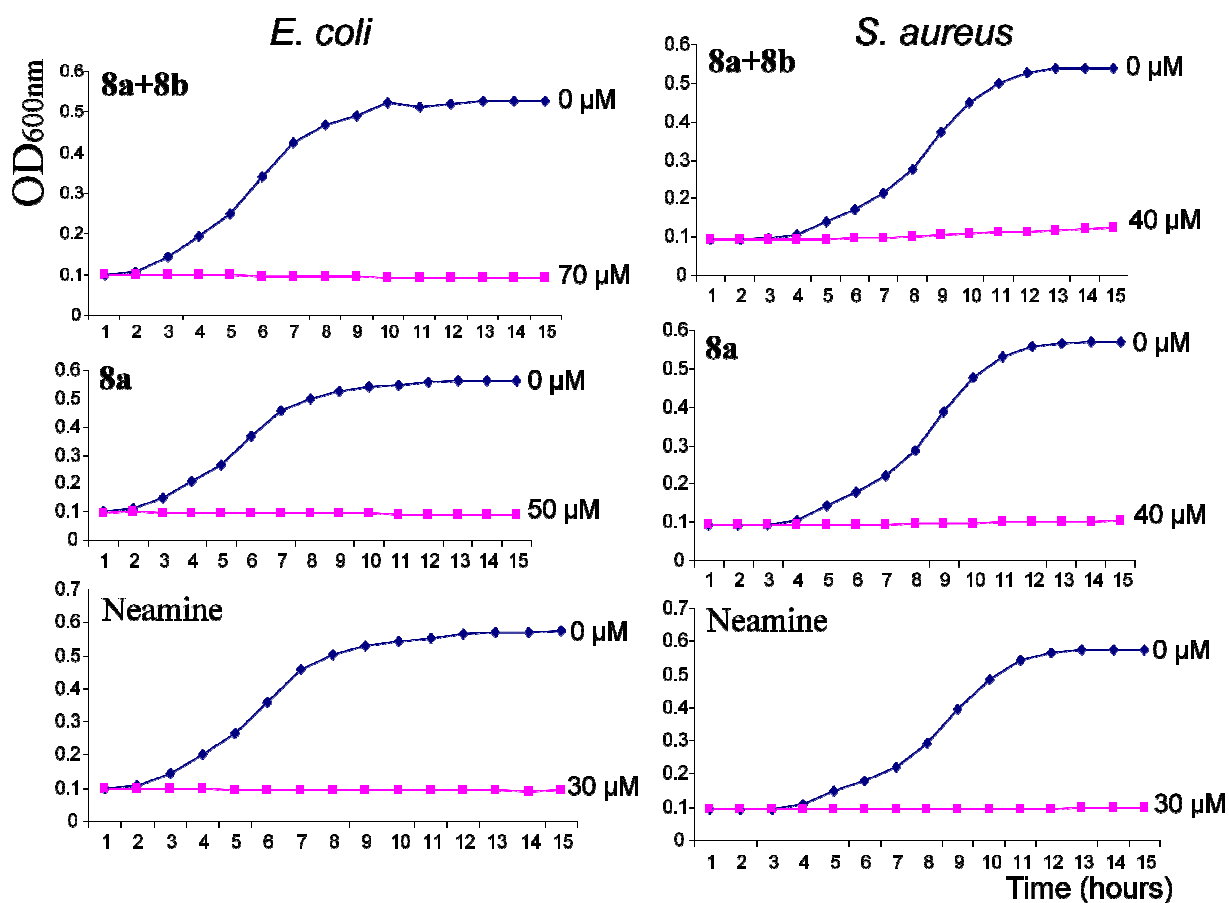

Figure 1

**Figure 1 legend:** Growth inhibition of the aminoglycoside derivatives on *E. coli* and *S. aureus* bacteria. Growth inhibition patterns of compounds **8a+8b** and **8a** compared to the effect of the neamine (internal control) during *E. coli* (left panels) and *S. aureus* (right panels) growths. For all the aminoside derivatives, only one concentration is indicated corresponding to the lowest that suppresses bacterial growth during a 15 hour incubation time (in red). The growth curves in the absence of the aminoglycosides are in blue.

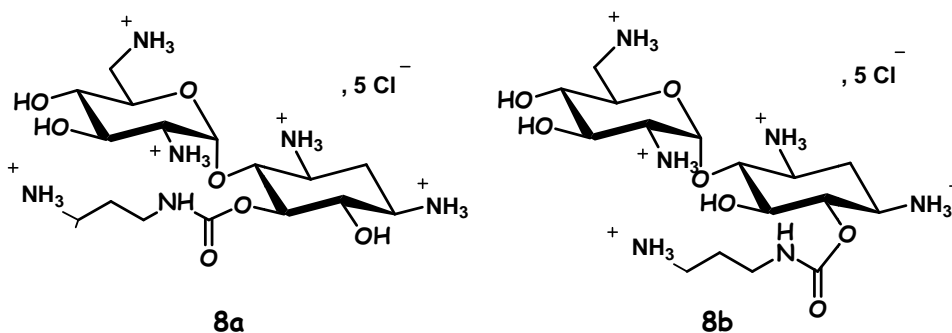

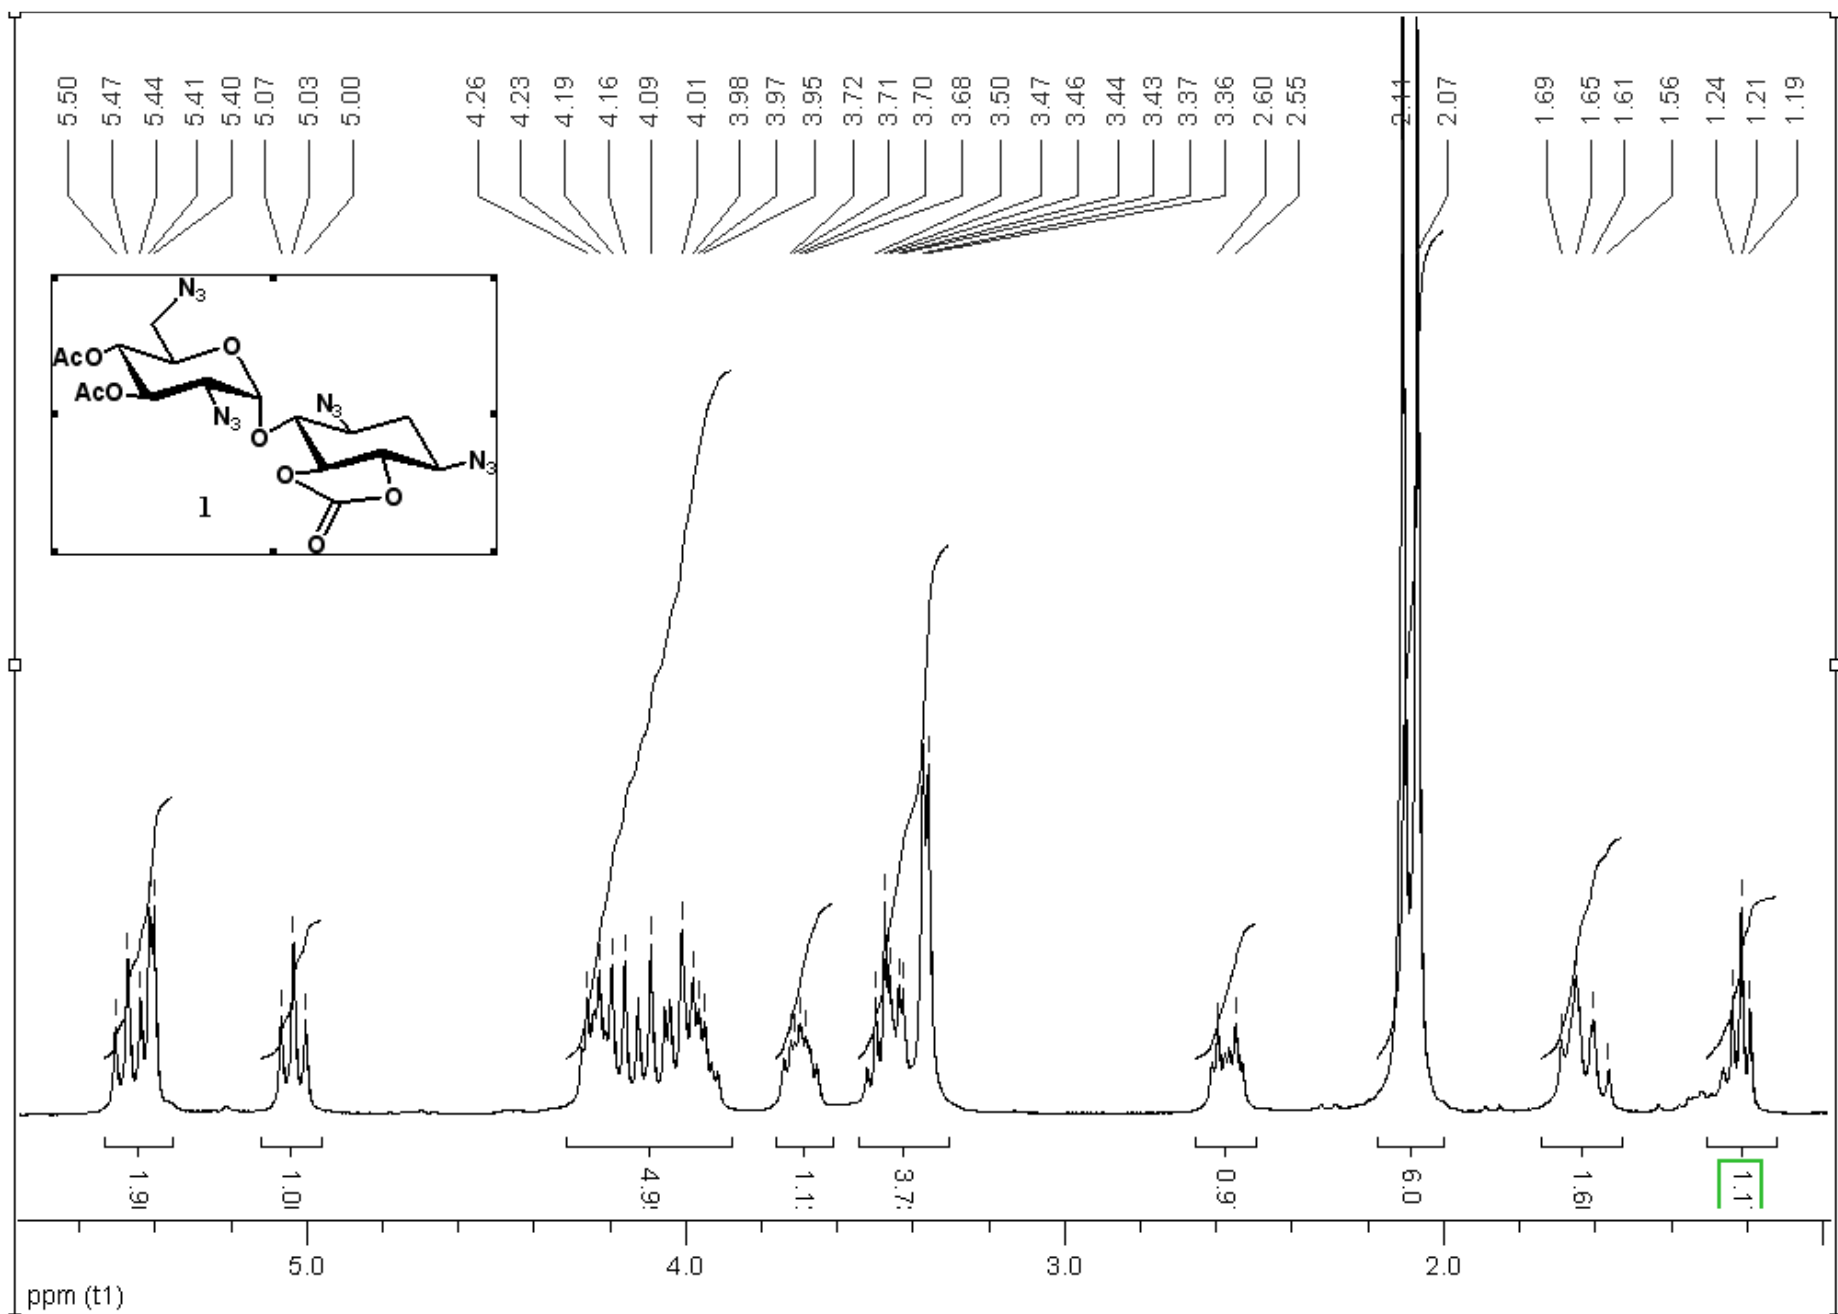

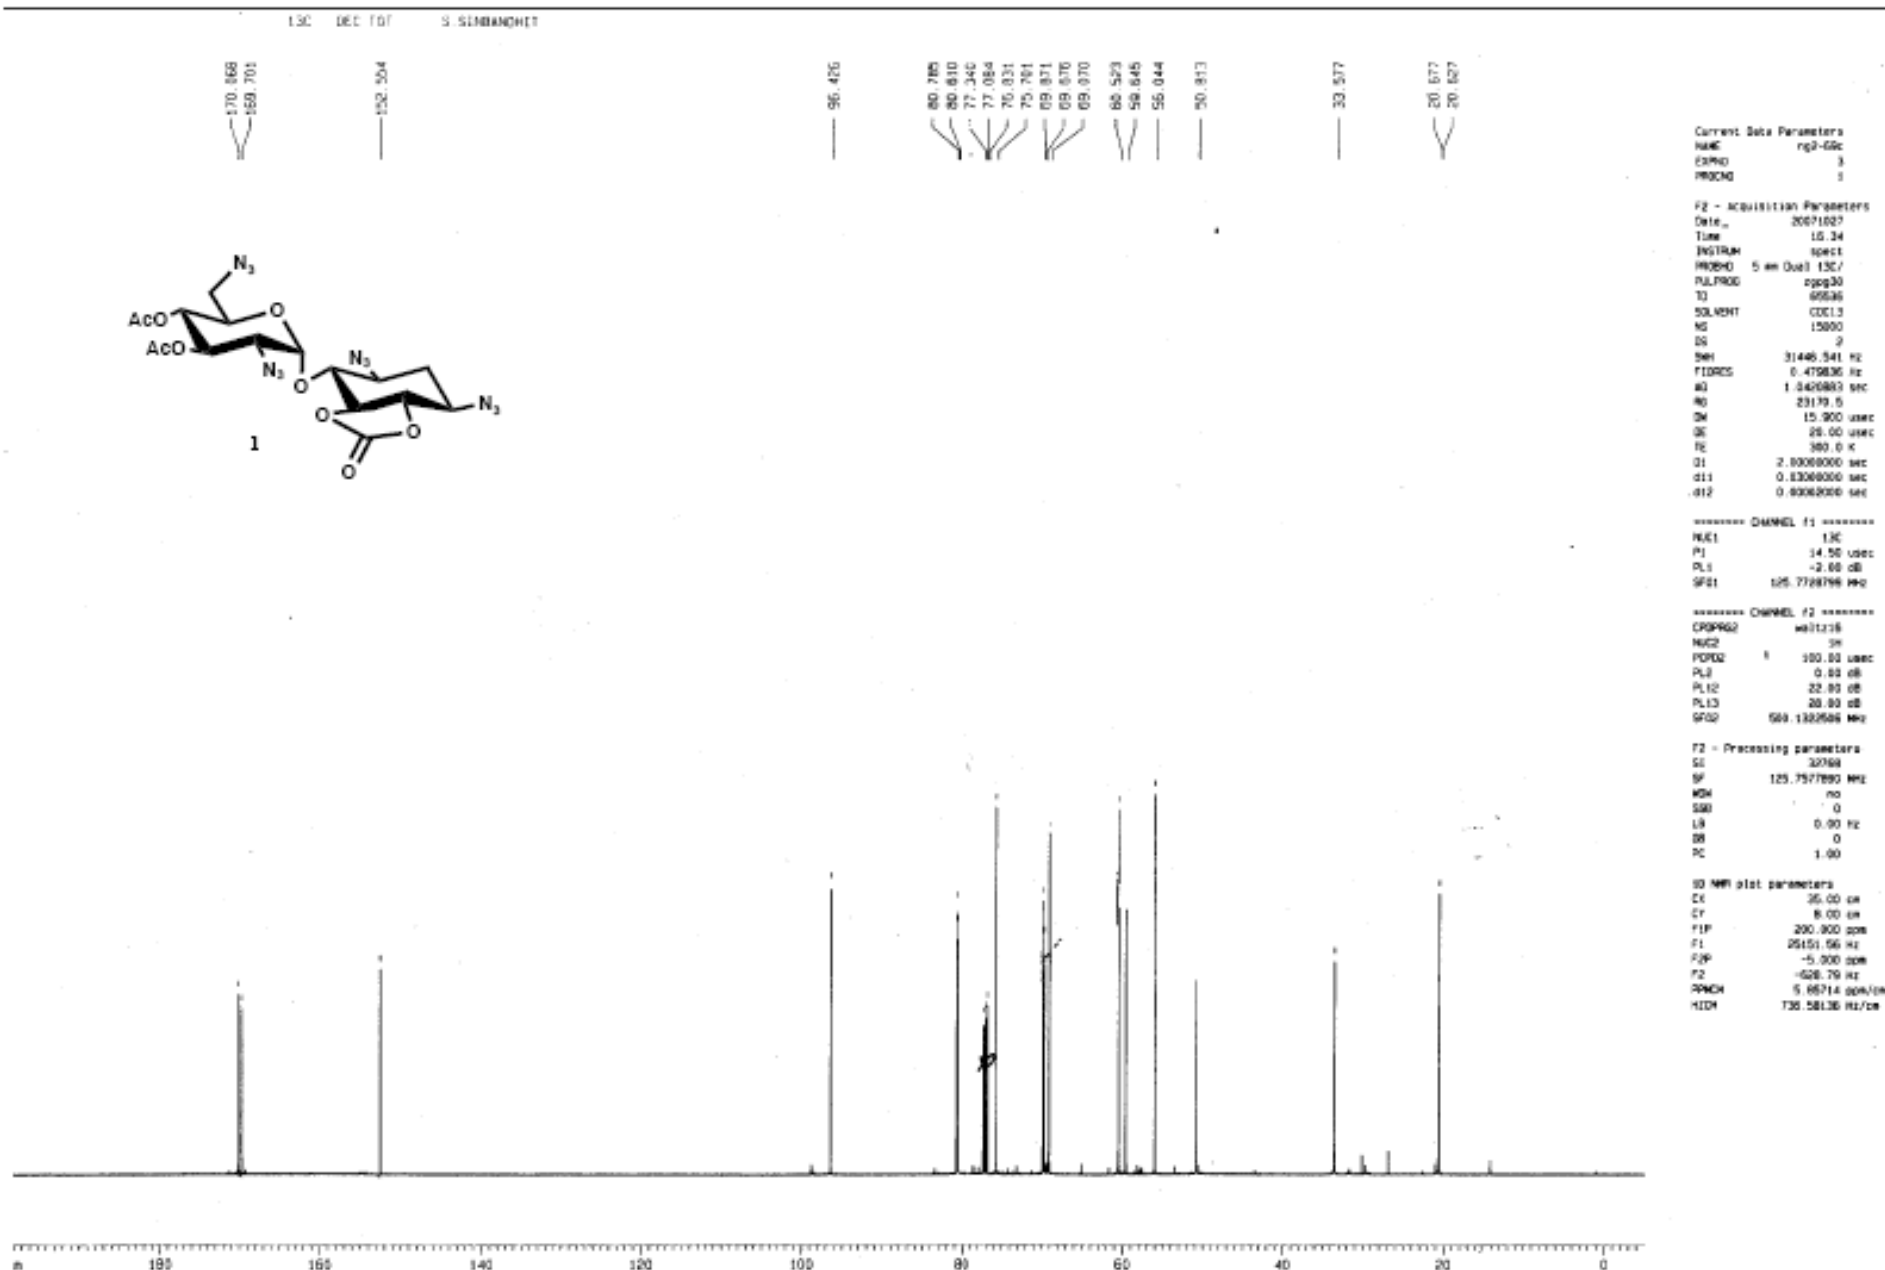

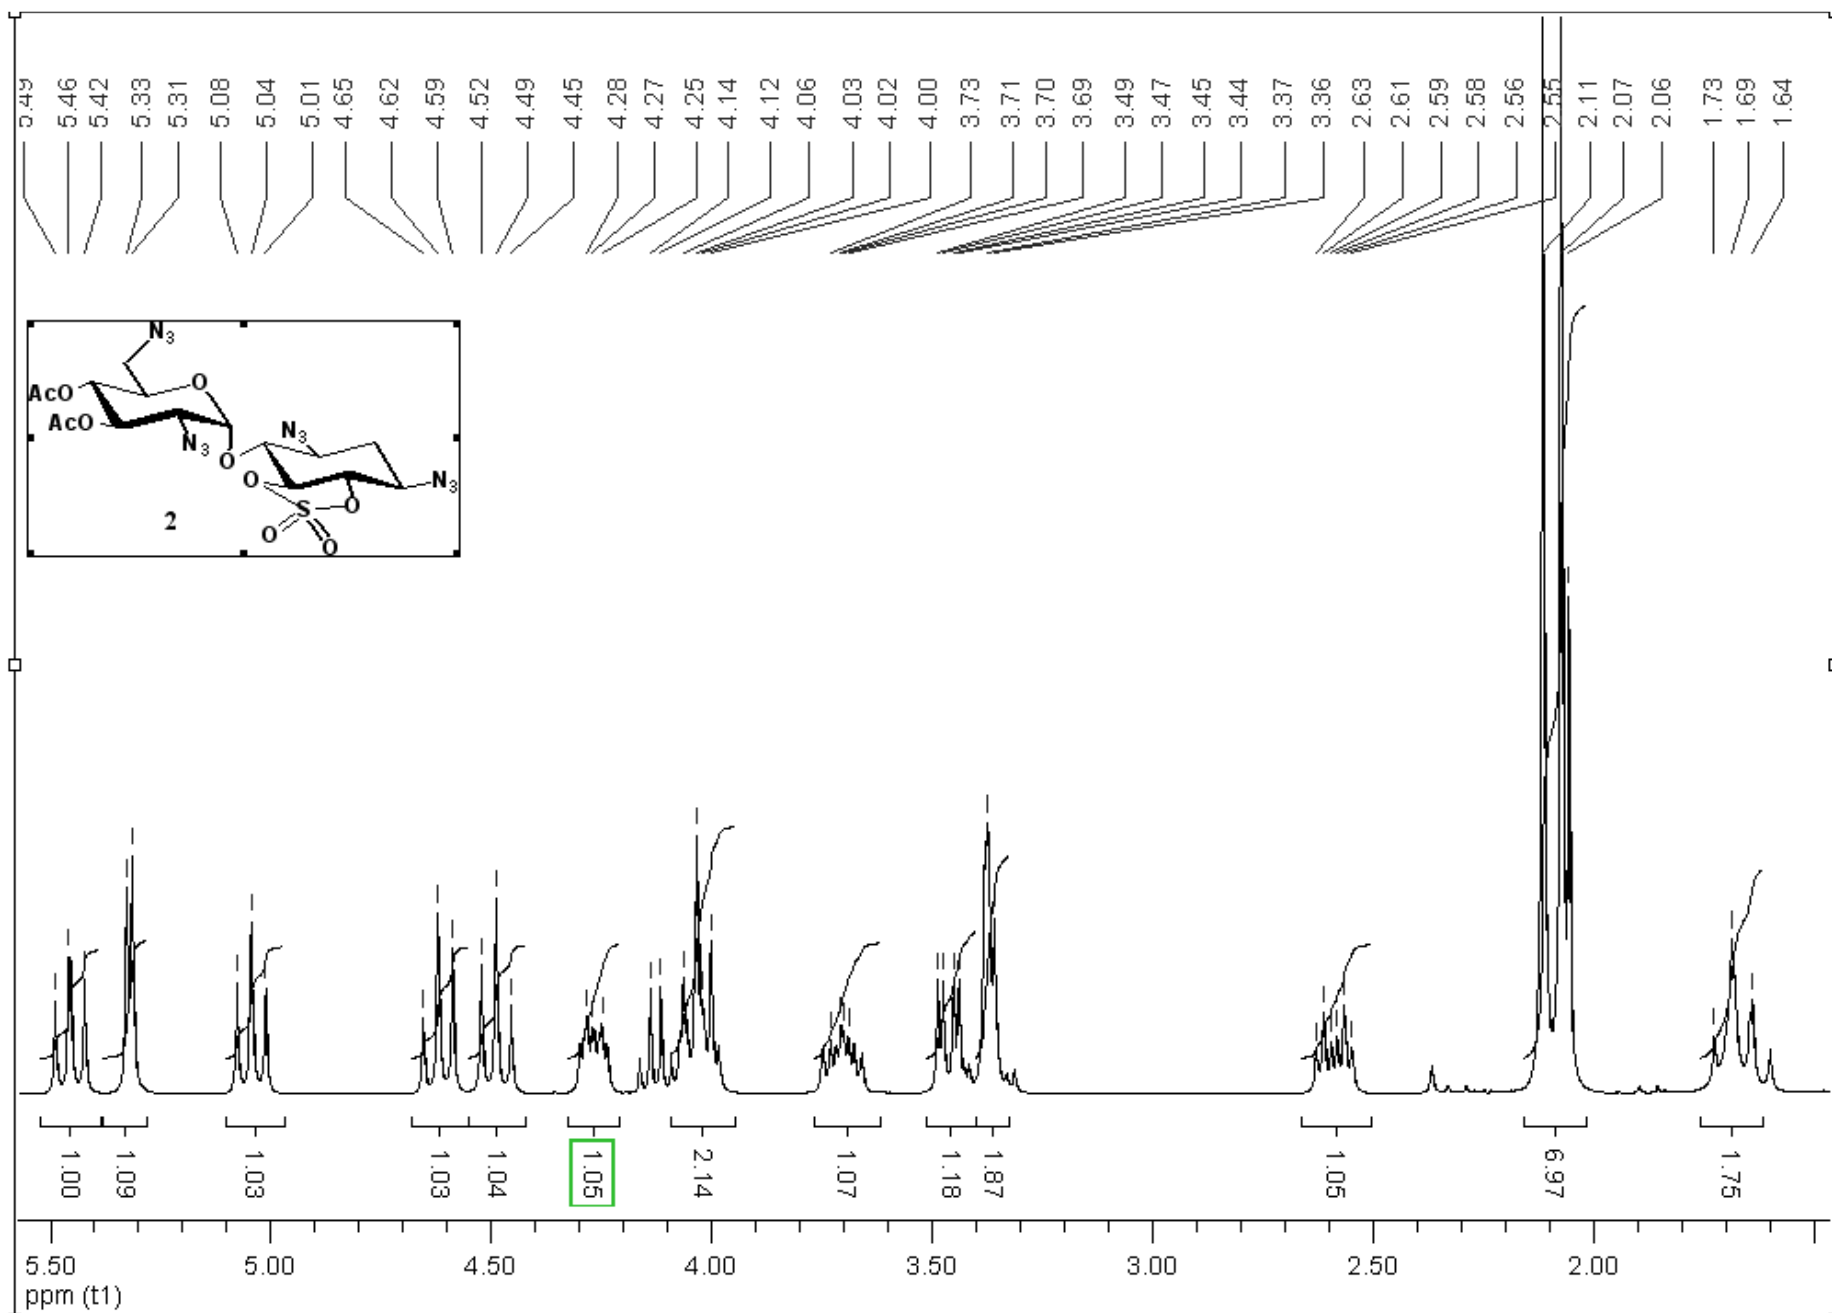

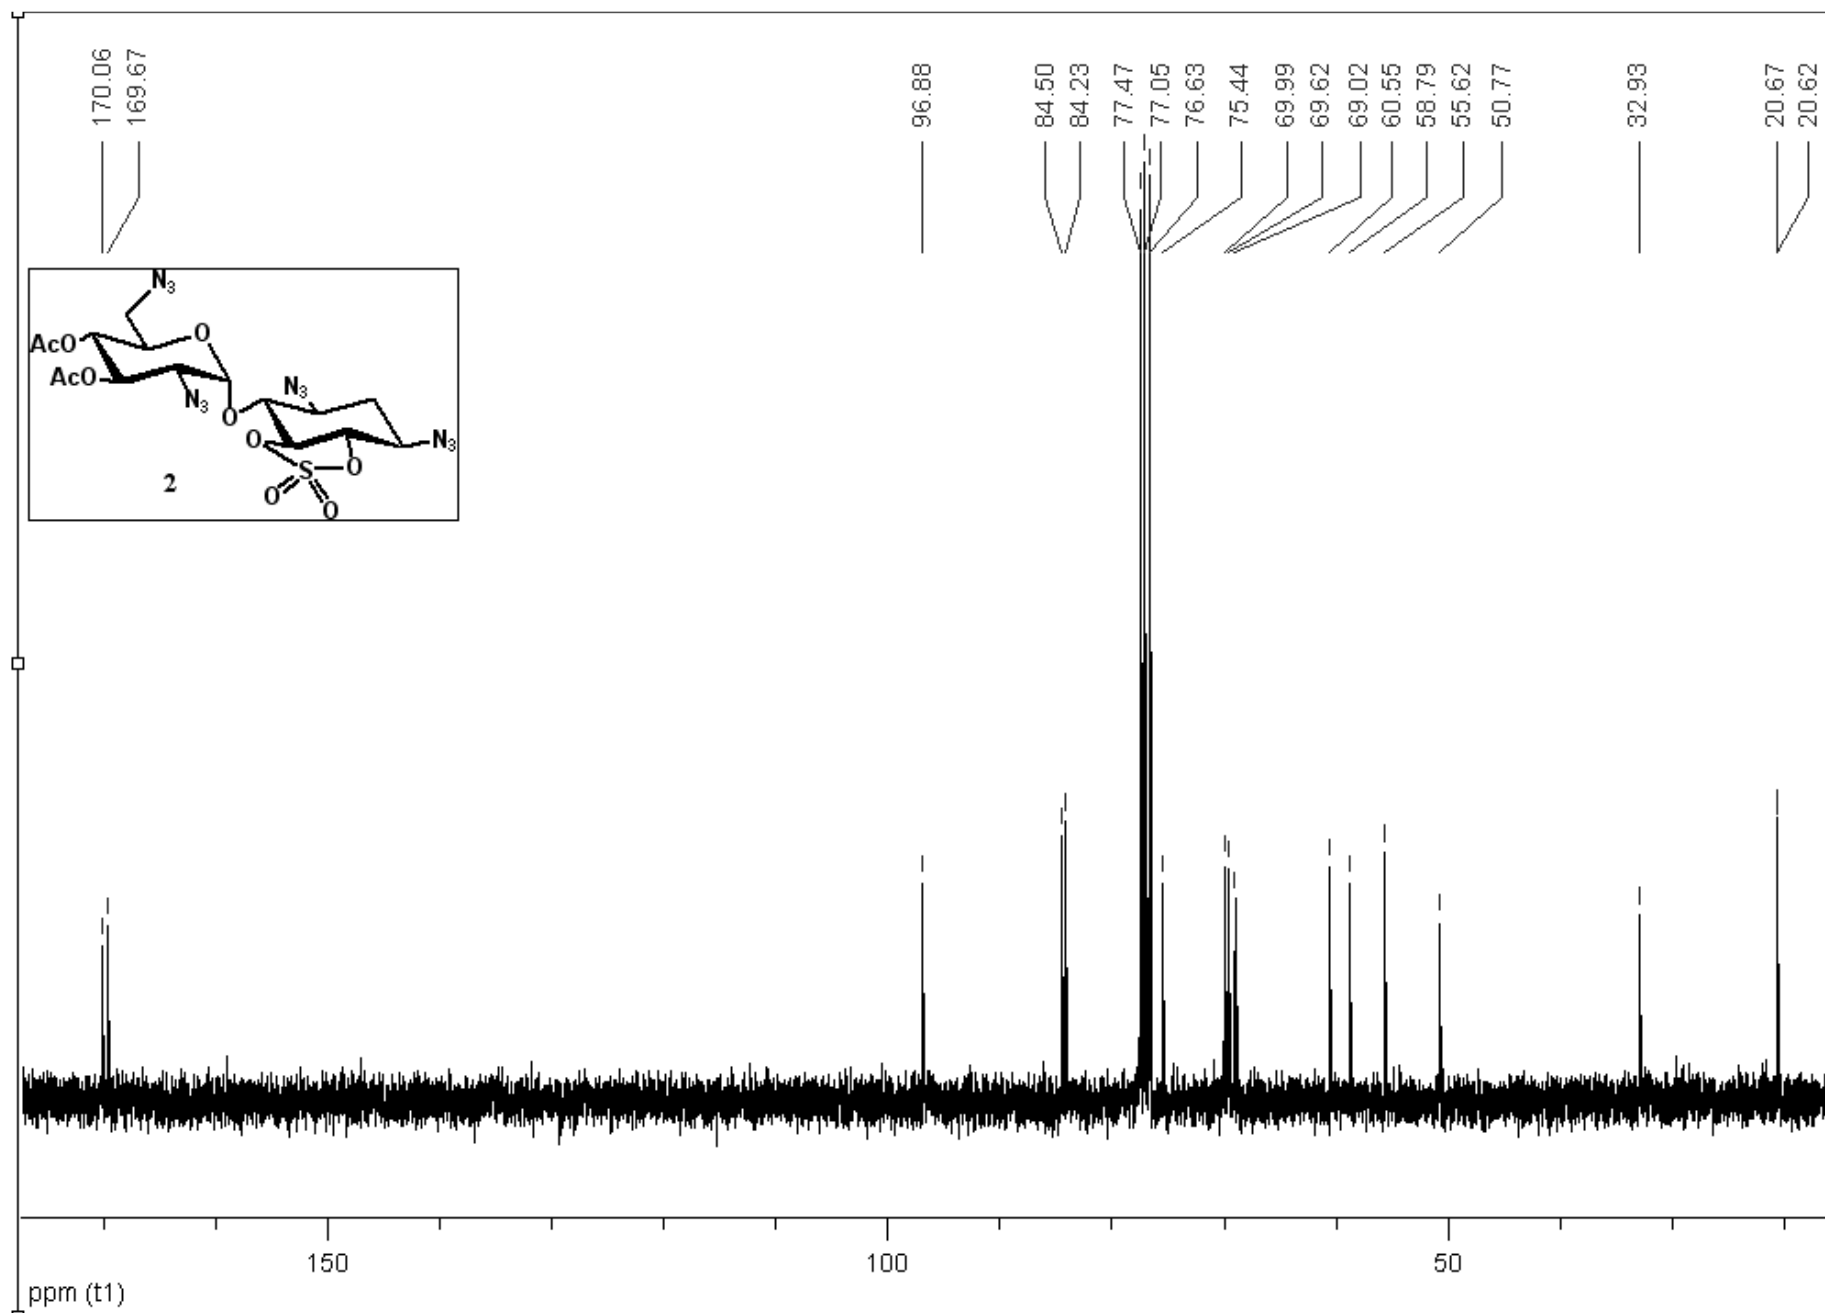

170.06  
169.67

96.88

84.50

84.23

77.47

77.05

76.63

75.44

69.99

69.62

69.02

60.55

58.79

55.62

50.77

32.93

20.67

20.62

ppm (t1)

150

100

50

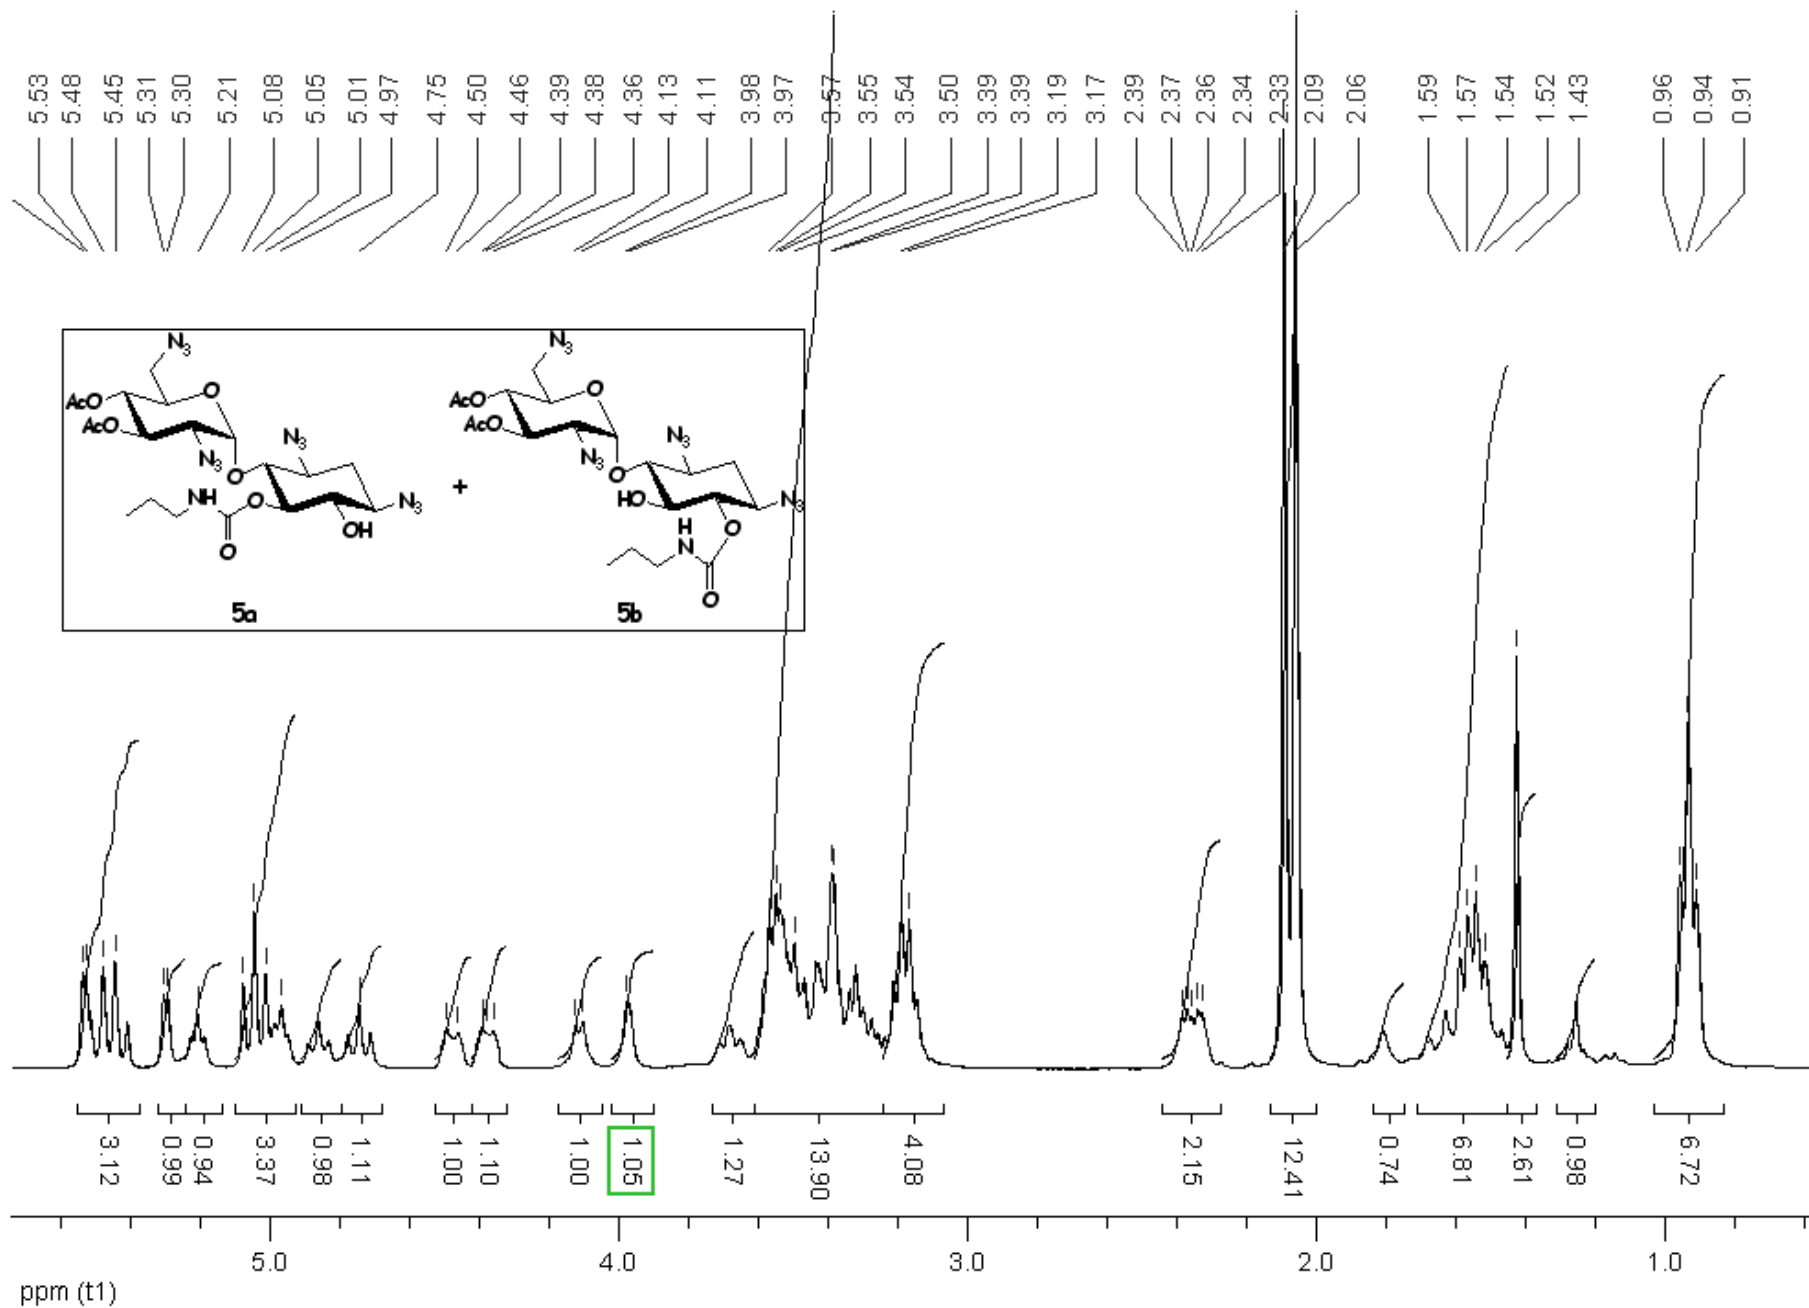



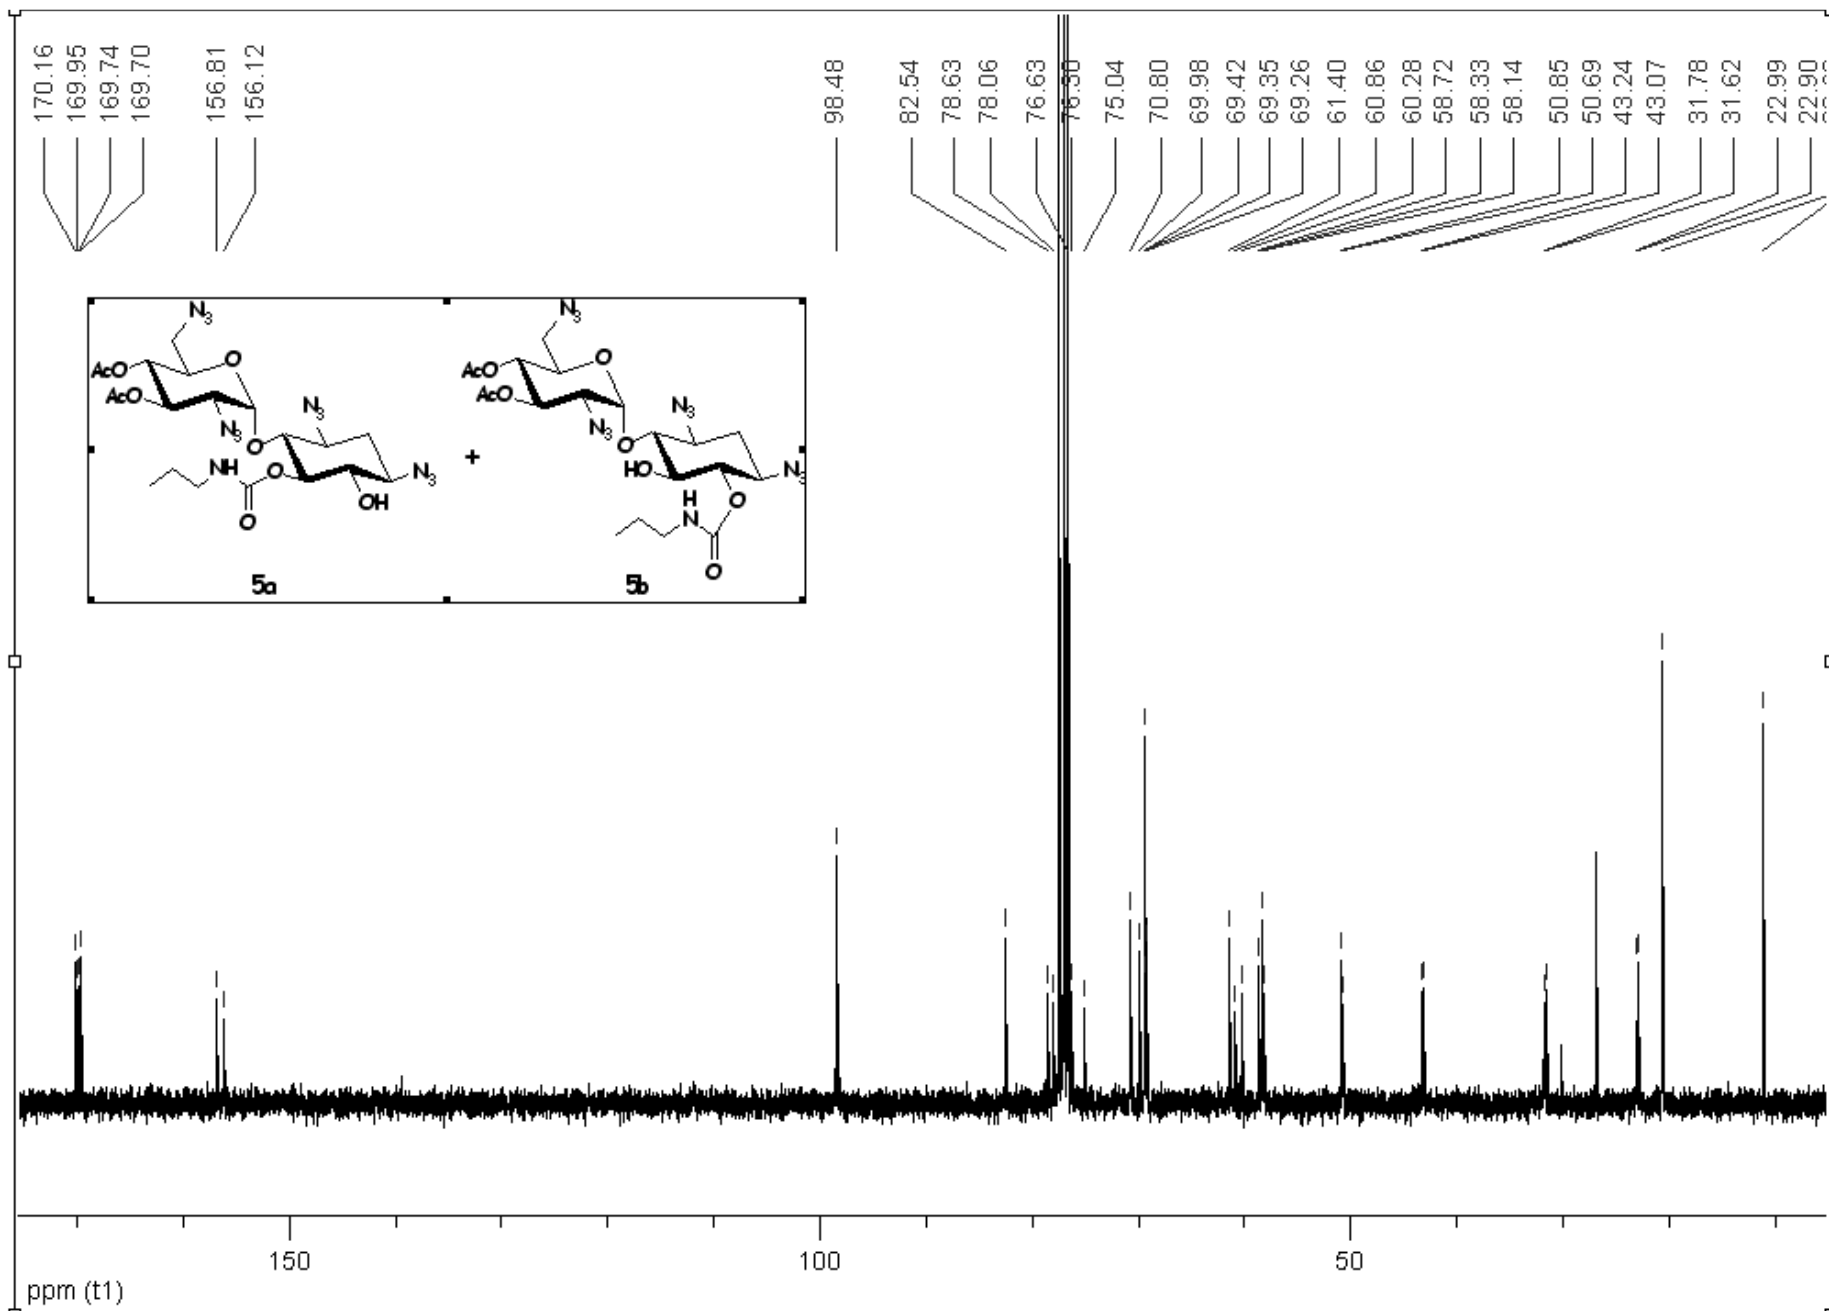

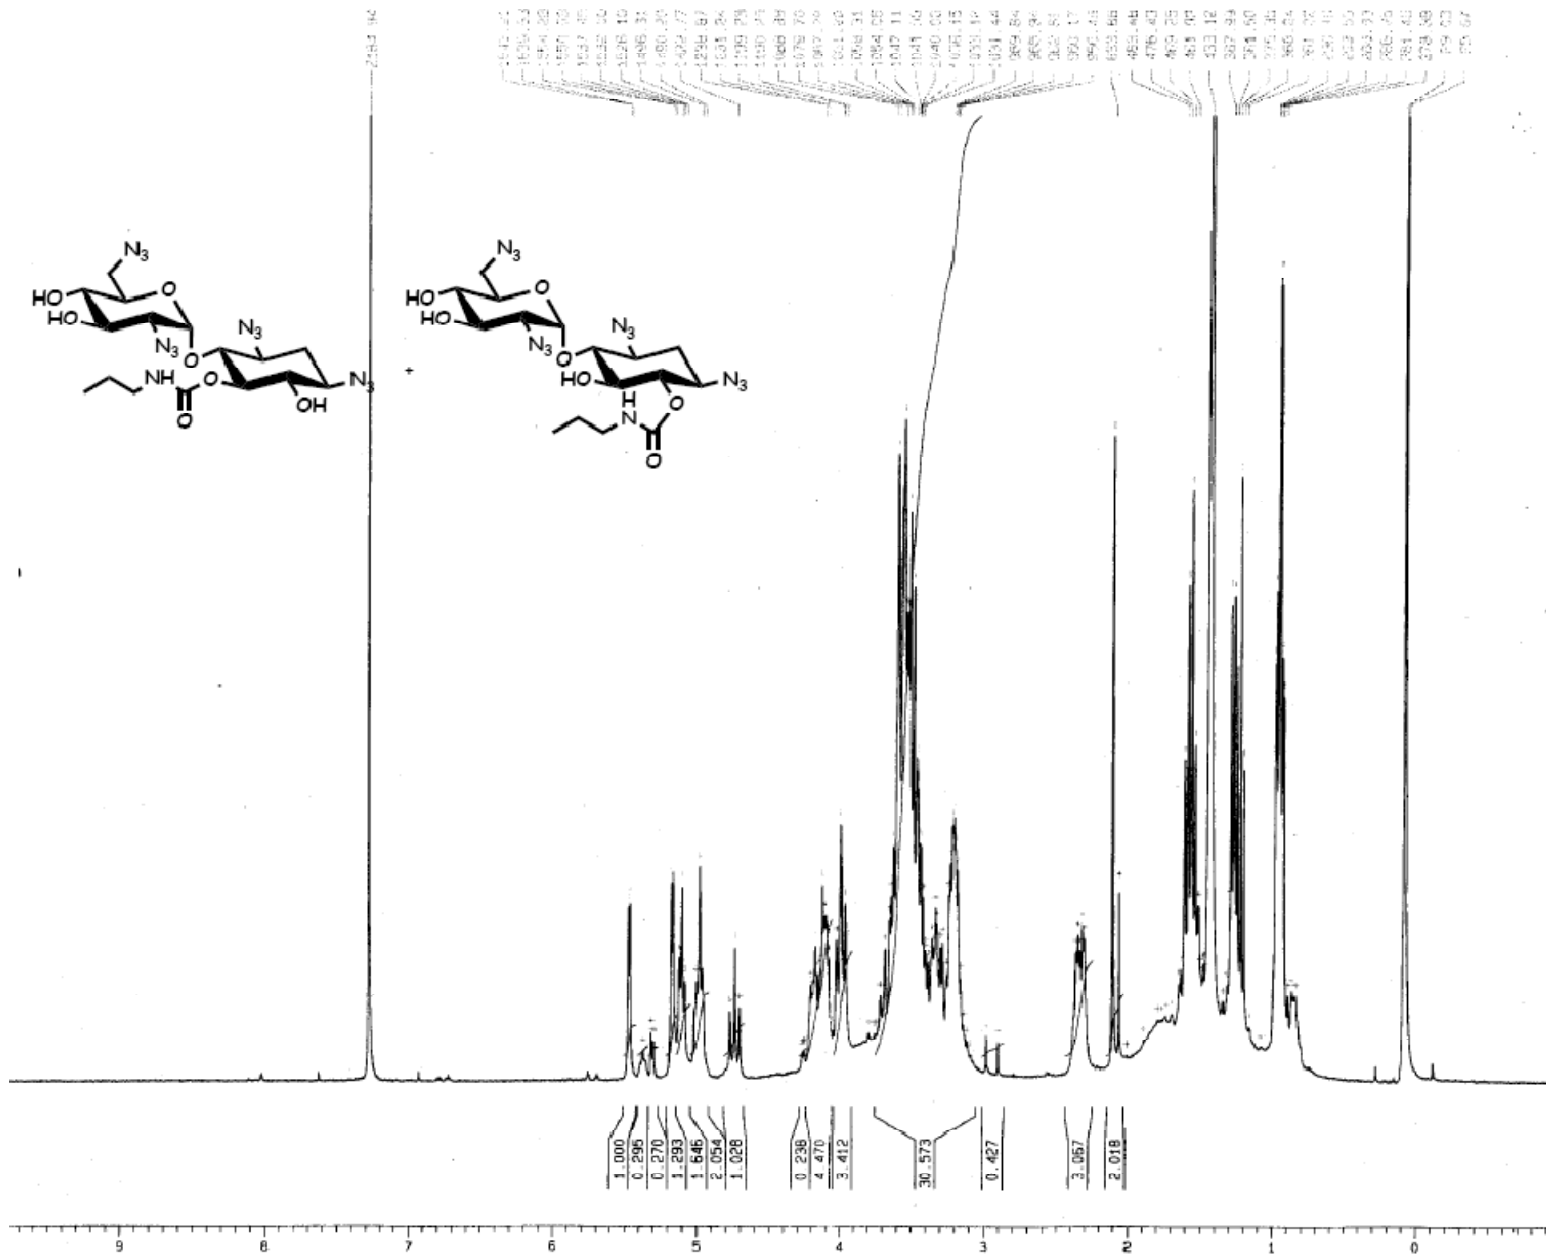

Current Data Parameters  
 NAME ng2-83b  
 EXPNO 1  
 PROCNO 1

F2 - Acquisition Parameters  
 Date\_ 20071207  
 Time 13.52  
 INSTRUM spect  
 PROBHD 5 mm BBO BB-1H  
 PULPROG zg30  
 TD 16384  
 SOLVENT CDCl3  
 NS 67  
 DS 2  
 SWH 6172.839 Hz  
 FIDRES 0.376760 Hz  
 AQ 1.3271540 sec  
 RG 362  
 DW 81.000 usec  
 DE 5.00 usec  
 TE 300.0 K  
 D1 1.0000000 sec

\*\*\*\*\* CHANNEL f1 \*\*\*\*\*  
 NUC1 1H  
 P1 8.50 usec  
 PL1 0.00 dB  
 SFO1 300.1310534 MHz

F2 - Processing parameters  
 SI 16384  
 SF 300.1300000 MHz  
 MDW EM  
 SSB 0  
 LB 0.30 Hz  
 GB 0  
 PC 1.00

1D NMR plot parameters  
 CX 35.50 cm  
 CY 200.00 cm  
 F1P 11.000 ppm  
 F1 3301.43 Hz  
 F2P -1.000 ppm  
 F2 -300.13 Hz  
 PPMCM 0.33803 ppm/cm  
 HZCM 101.45241 Hz/cm

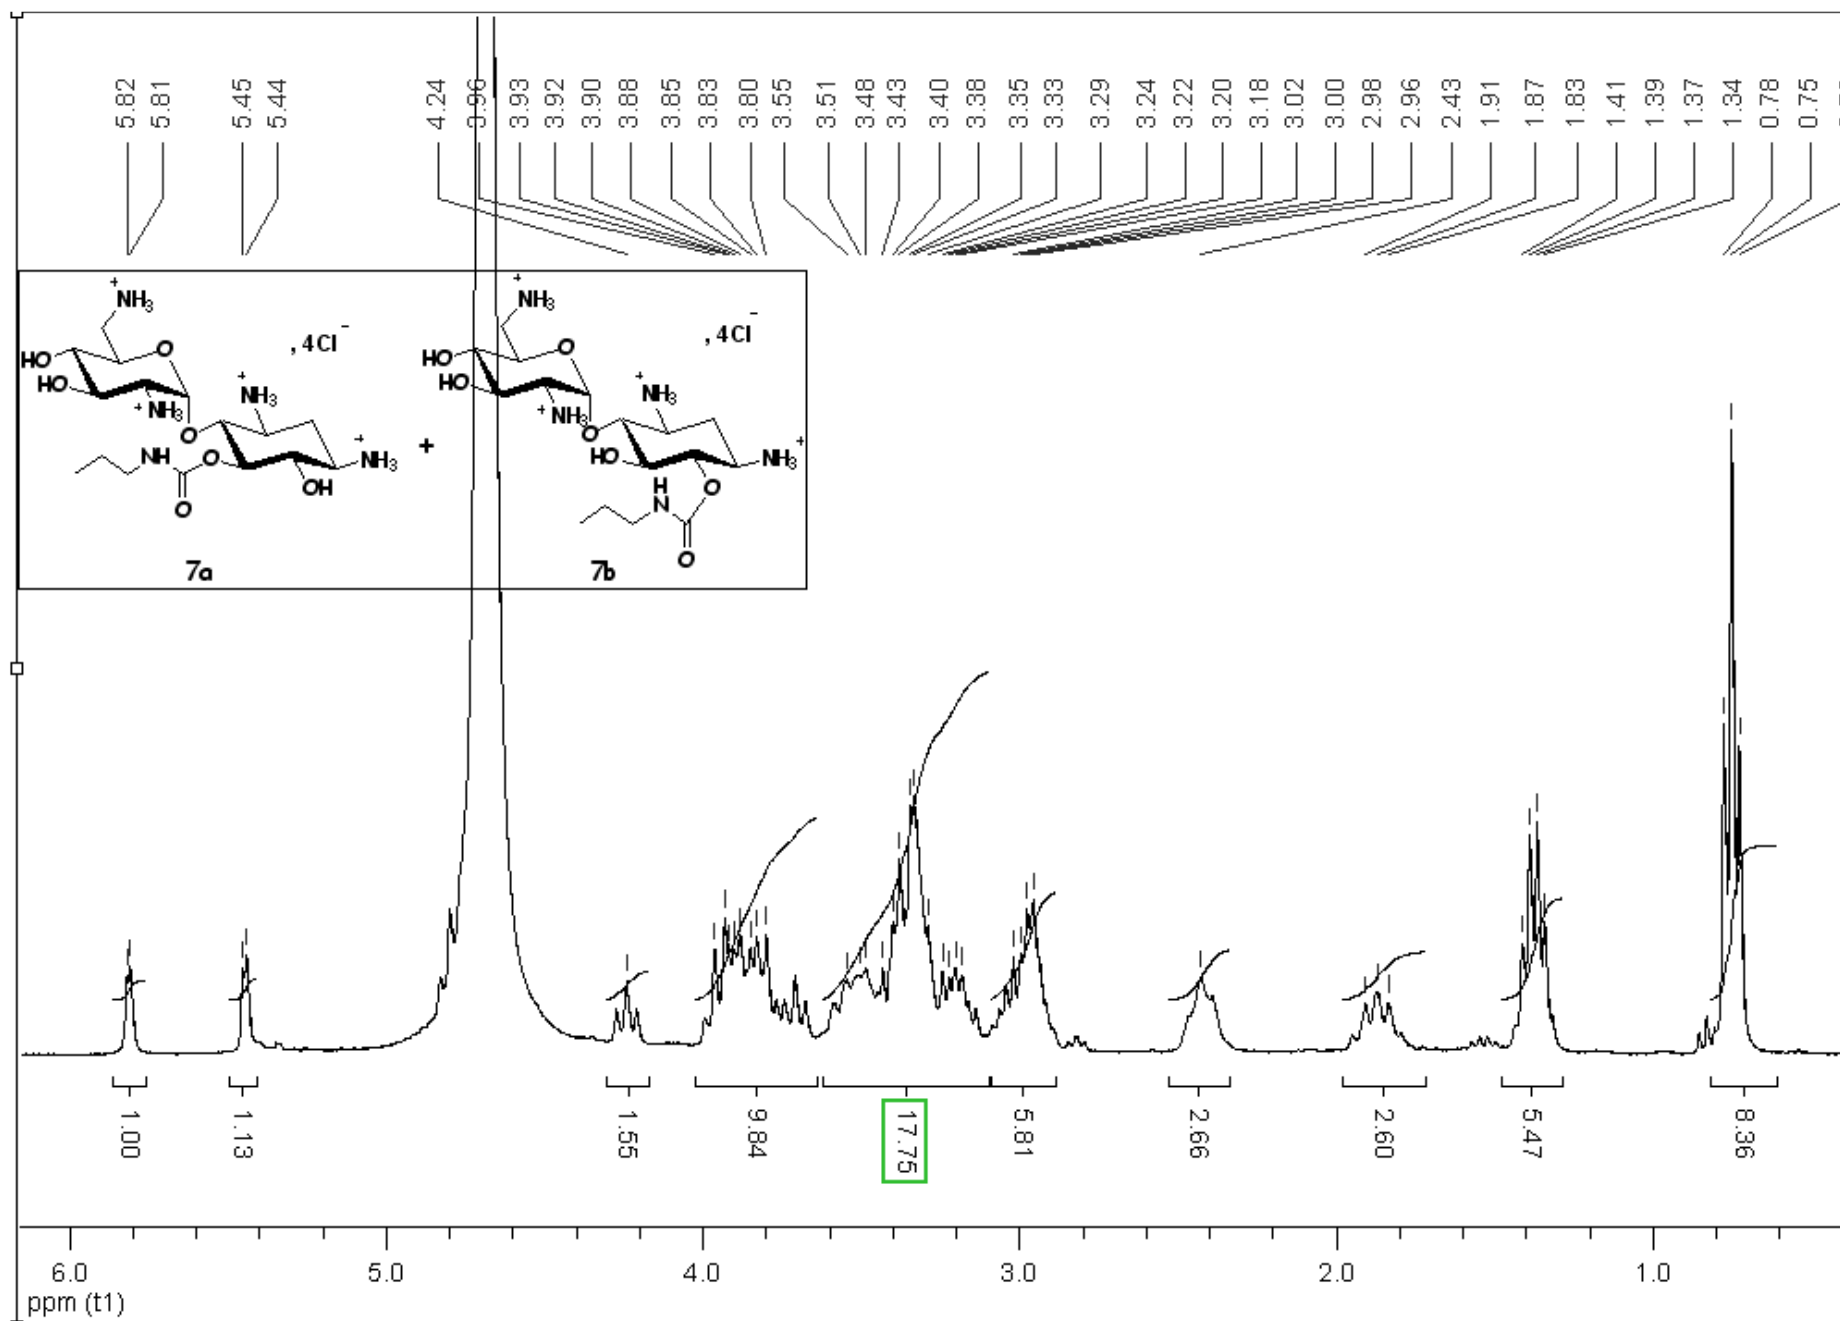

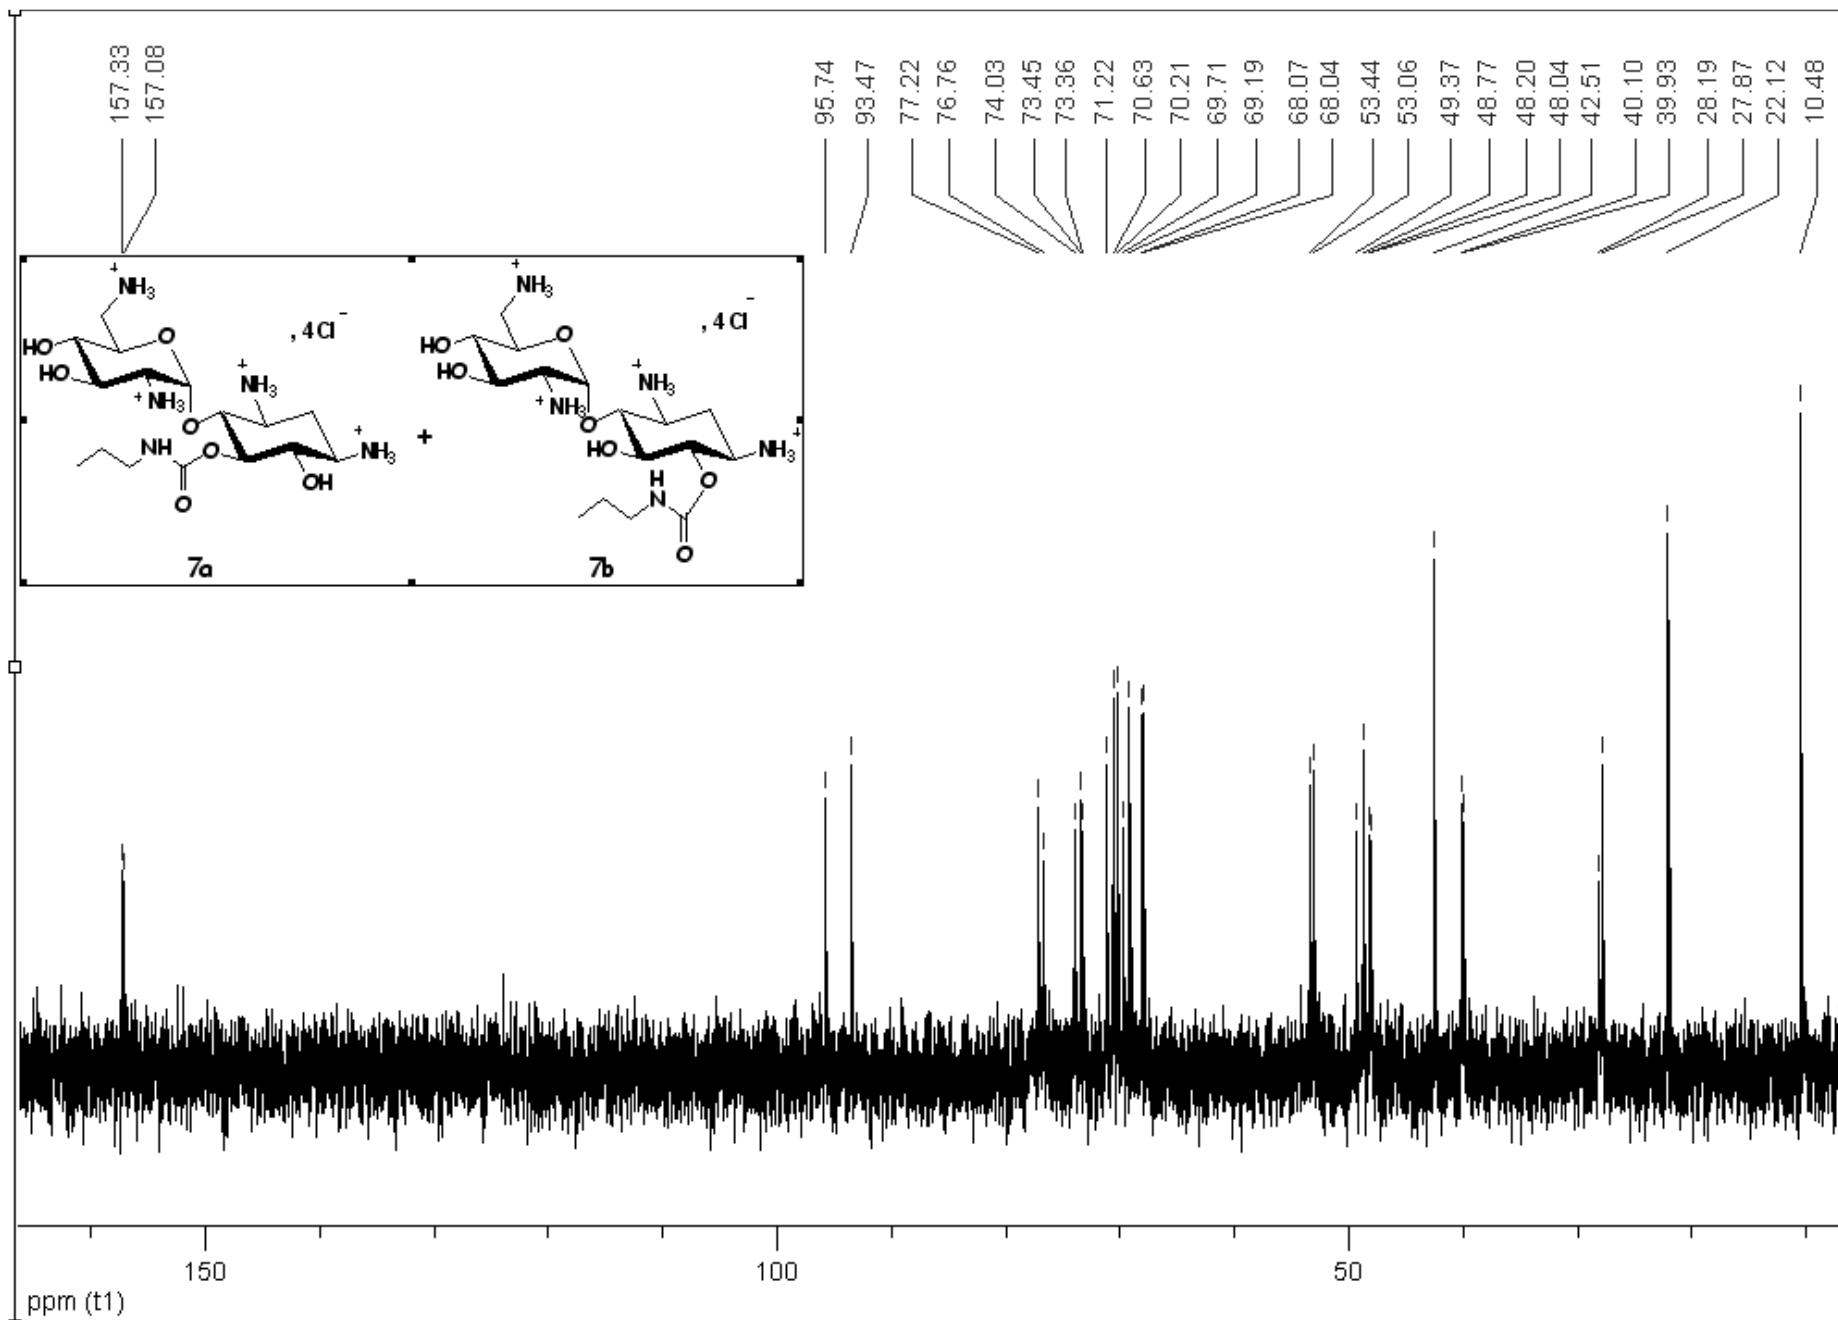

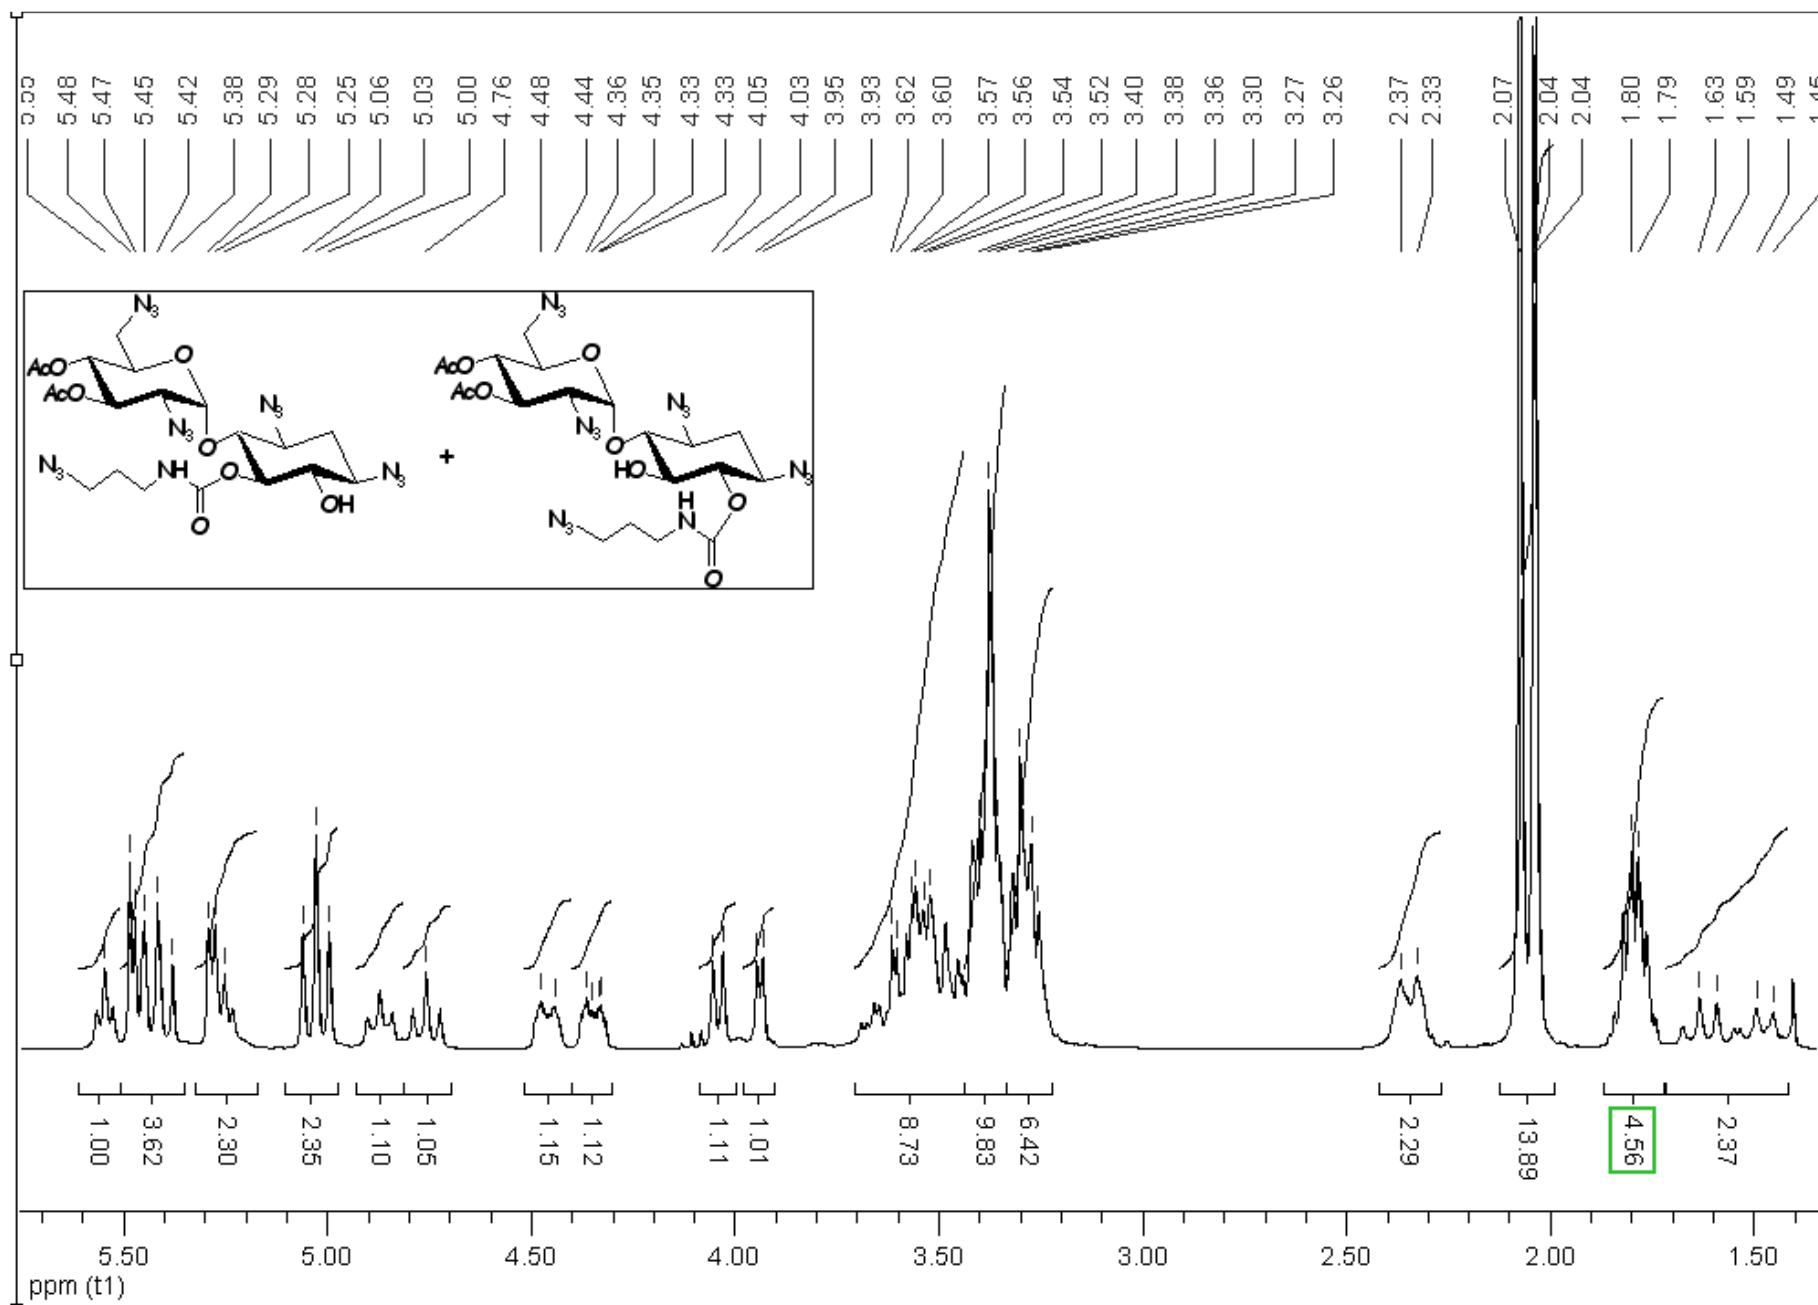

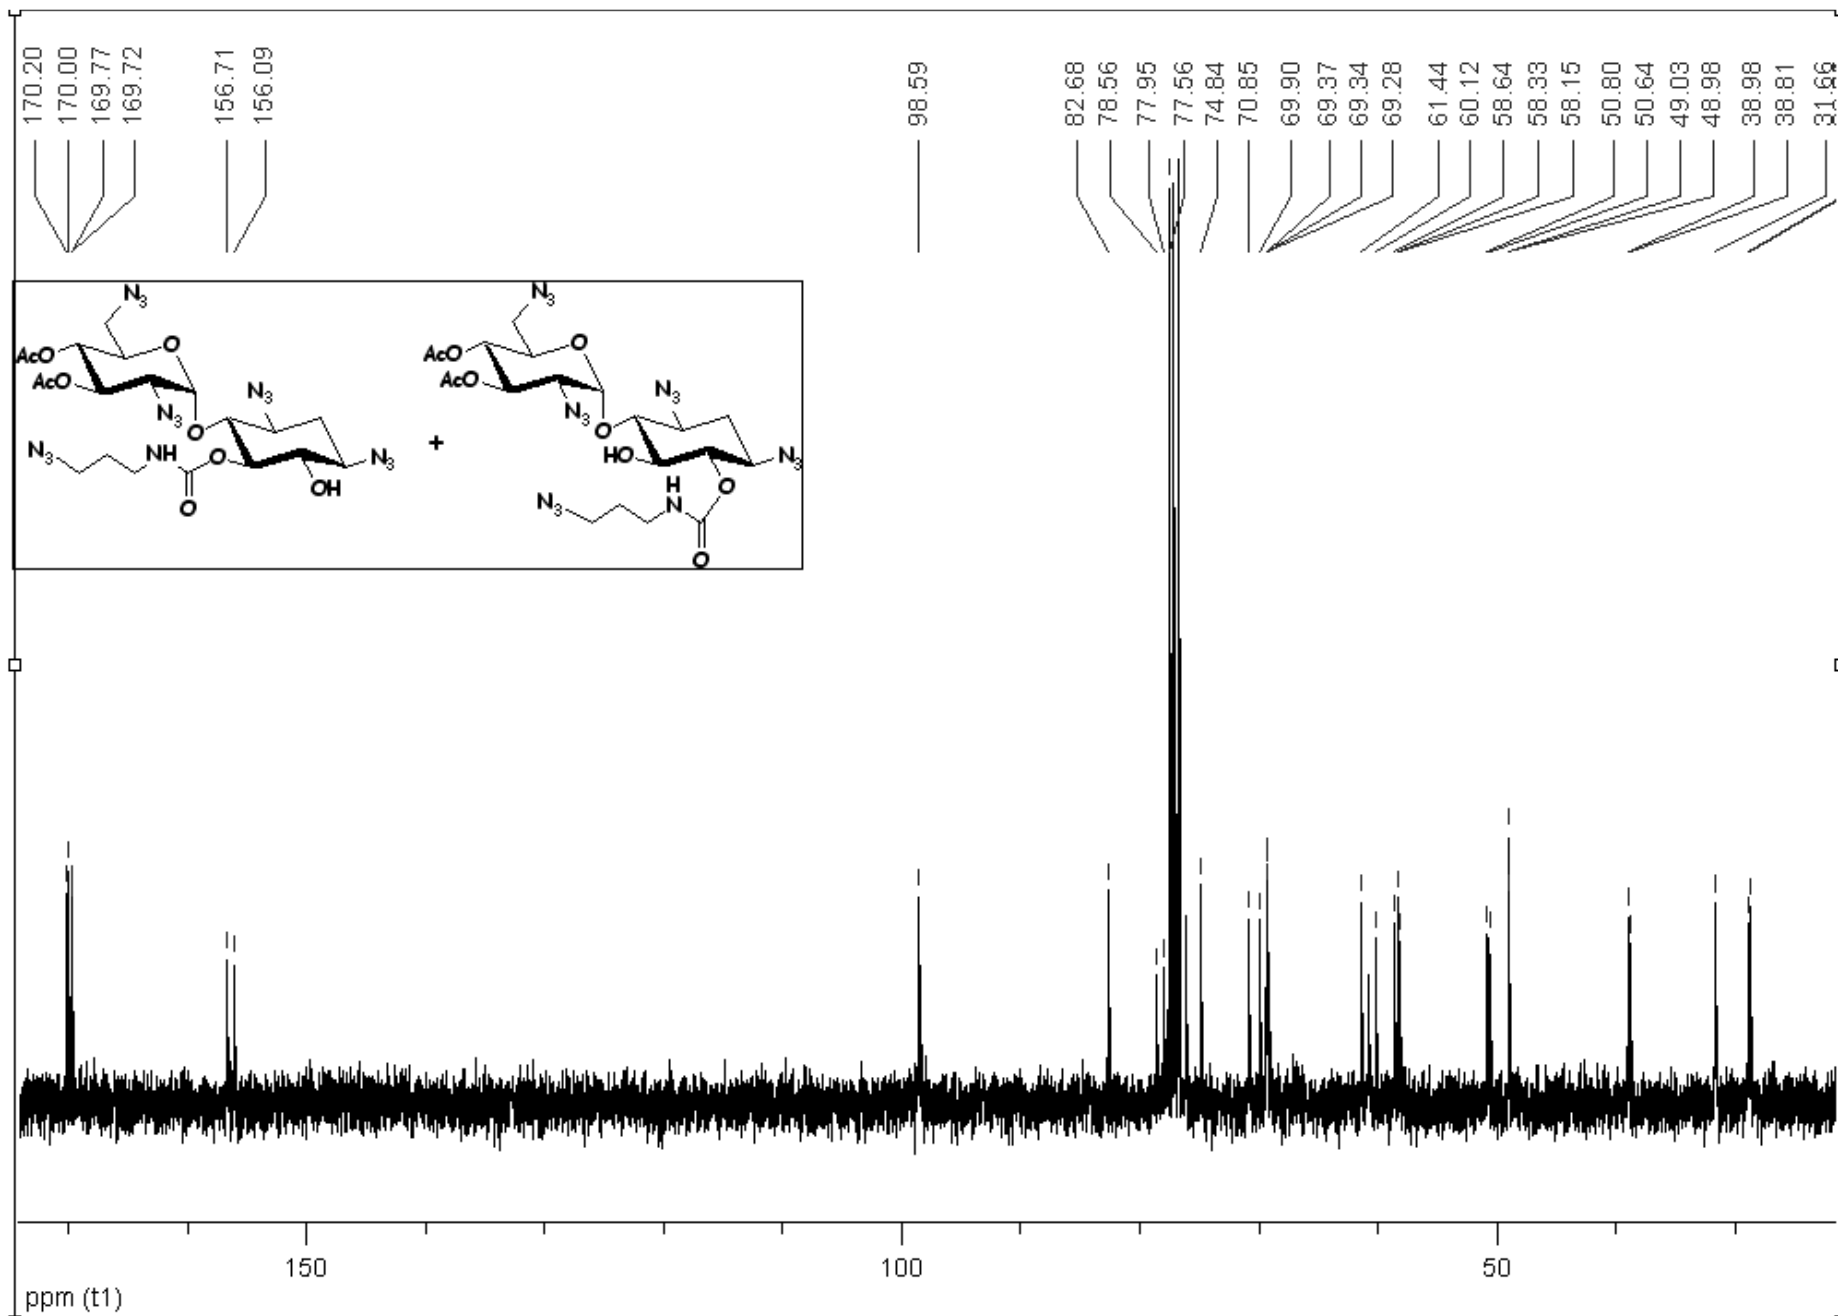

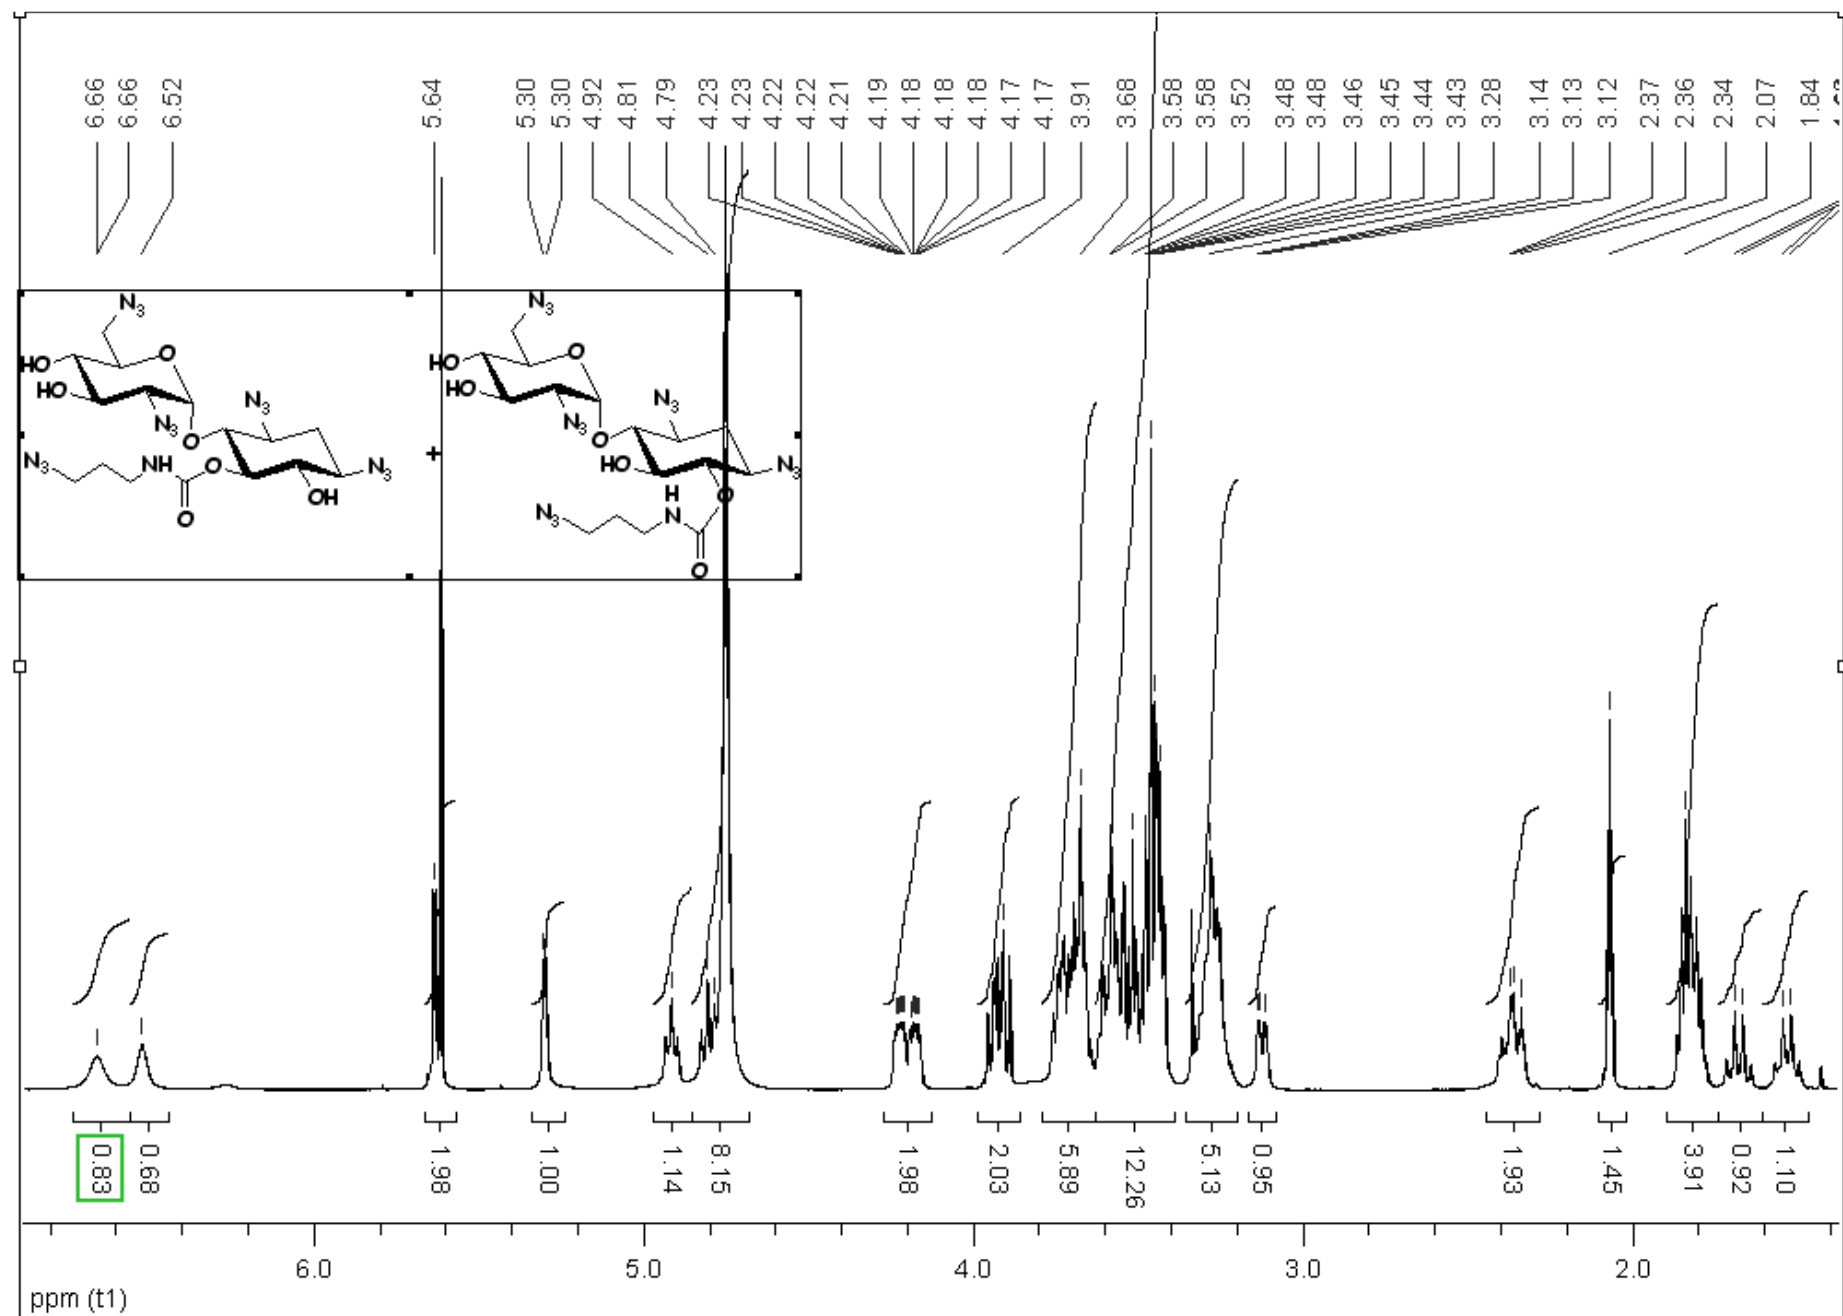

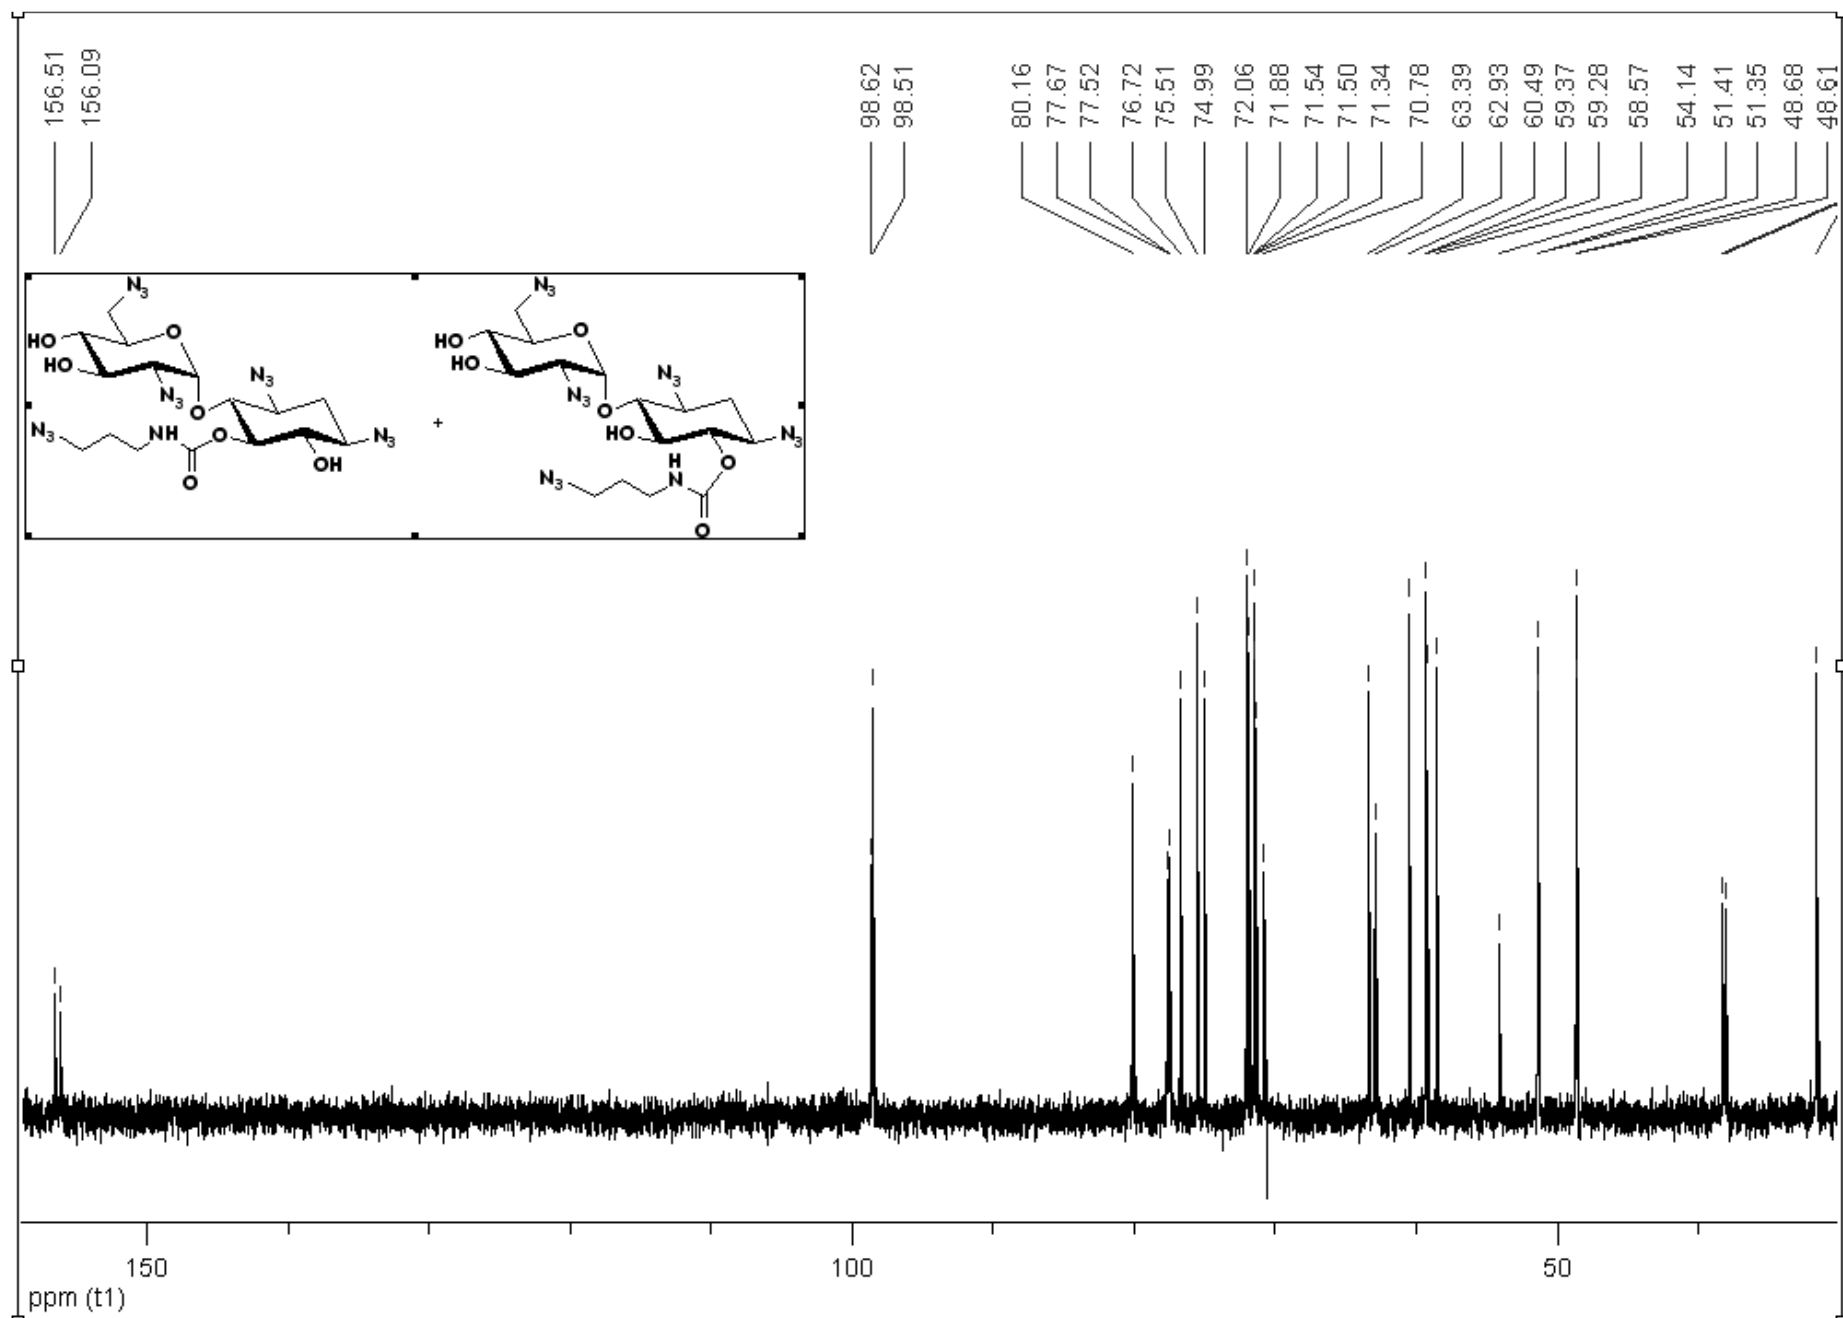



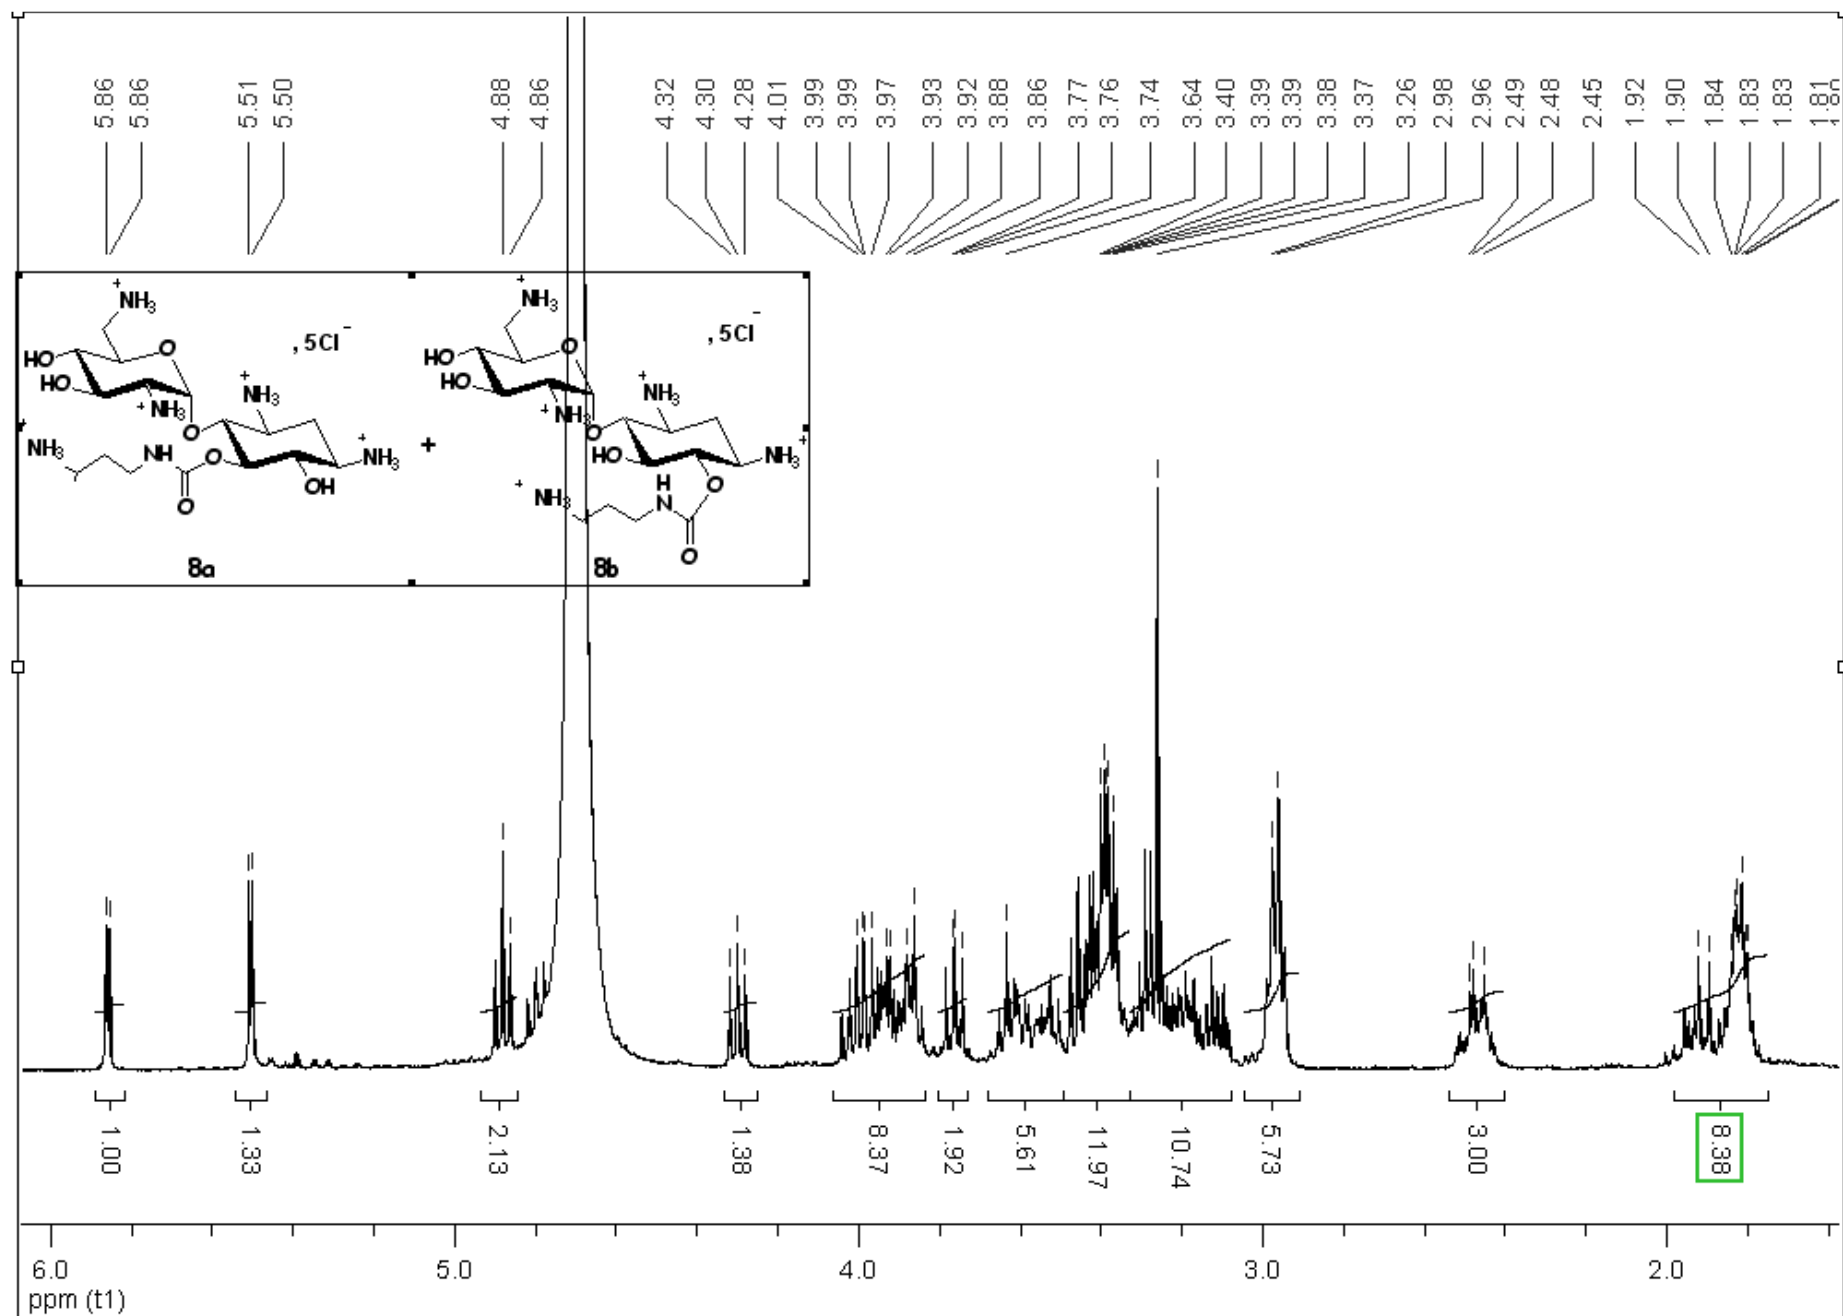

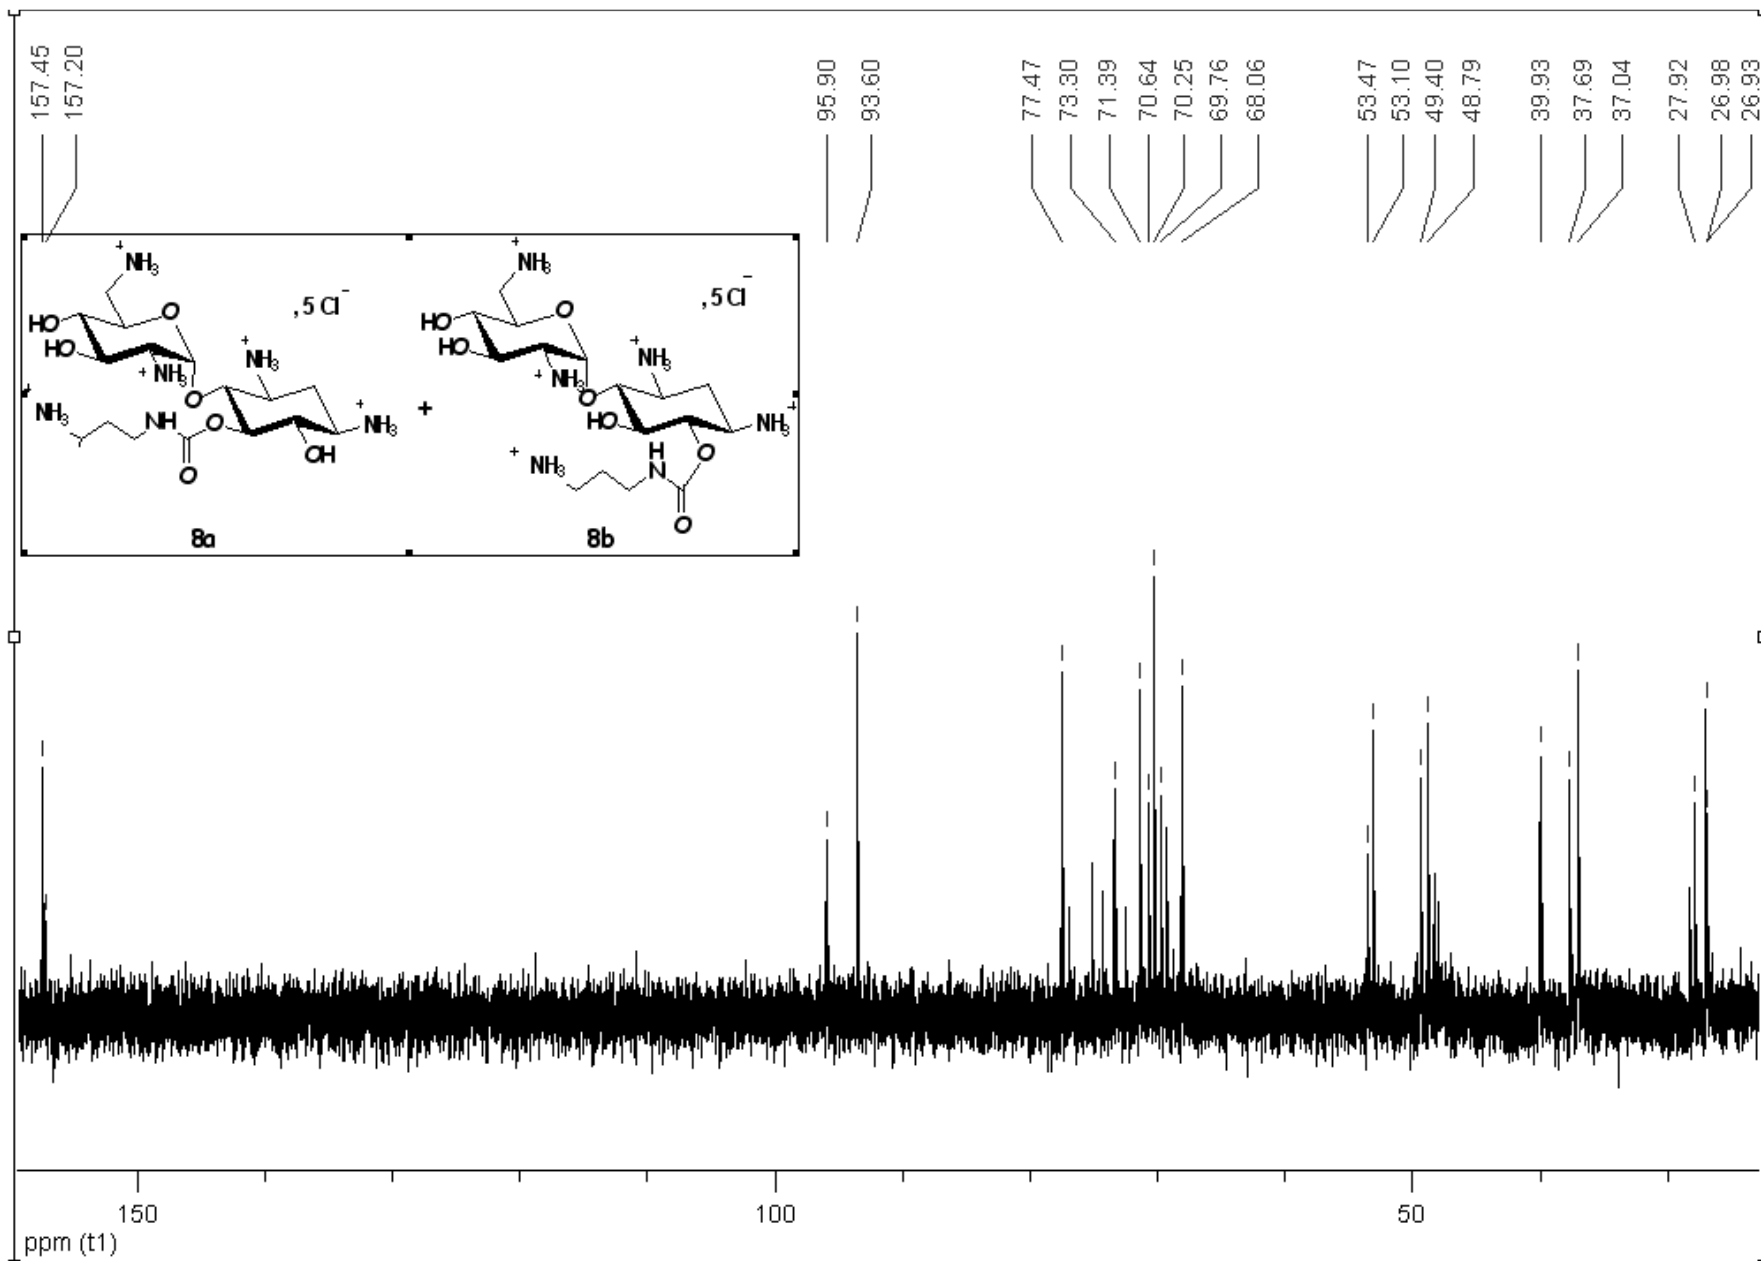

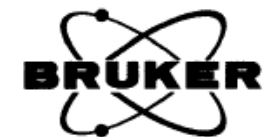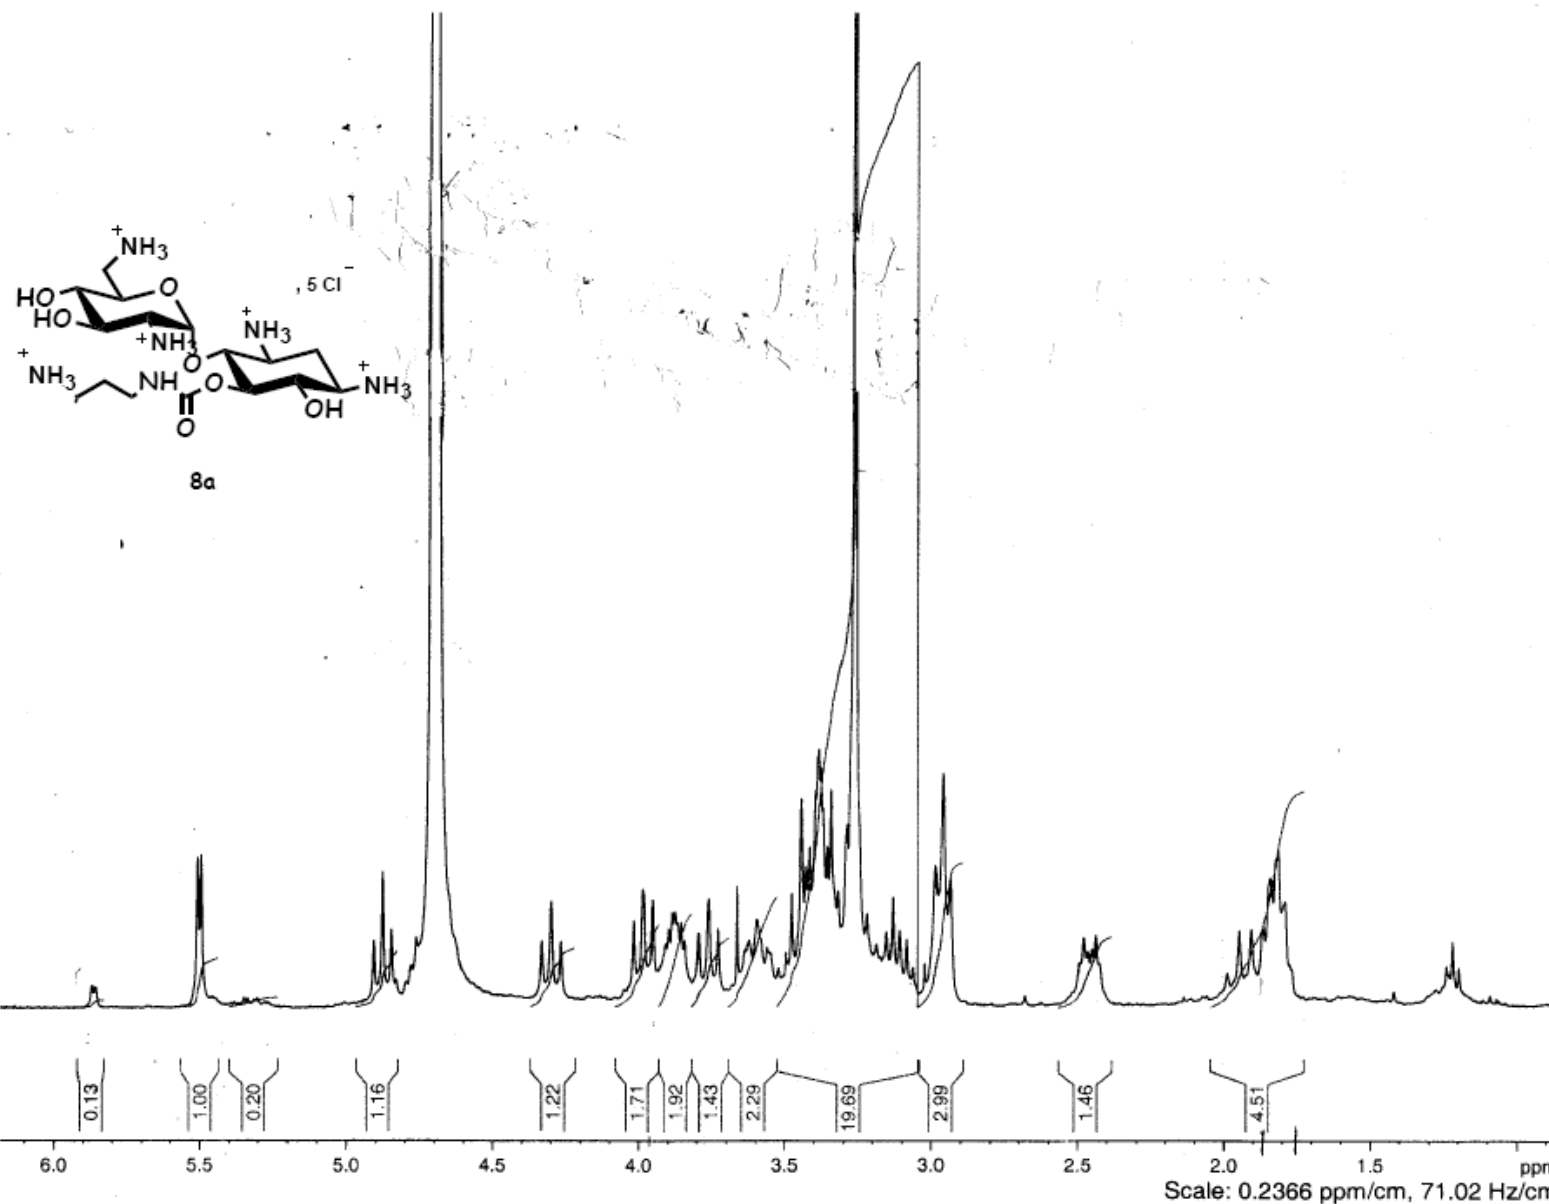

NAME FB3-46a  
EXPNO 1  
PROCNO 1  
Date\_ 20100219  
Time 11.08  
INSTRUM spect  
PROBHD 5 mm PABBO BB-  
PULPROG zg30  
TD 32768  
SOLVENT D2O  
NS 64  
DS 2  
SWH 6172.839 Hz  
FIDRES 0.188380 Hz  
AQ 2.6542580 sec  
RG 512  
DW 81.000 usec  
DE 6.50 usec  
TE 296.8 K  
D1 1.00000000 sec  
TD0 1

===== CHANNEL f1 =====  
NUC1 1H  
P1 8.20 usec  
PL1 -2.50 dB  
PL1W 23.22754669 W  
SFO1 300.1318534 MHz  
SI 32768  
SF 300.1300000 MHz  
WDW EM  
SSB 0  
LB 0.20 Hz  
GB 0  
FC 1.00

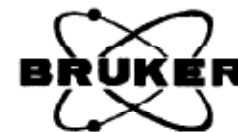

NAME 783-46e  
EXPNO 10  
PROCNO 1  
Date\_ 20100223  
Time 1.28  
INSTRUM spect  
PROBHD 5 mm PABBO B5-  
PULPROG zgpg30  
TD 65536  
SOLVENT D2O  
NS 650  
DS 2  
SWH 17985.611 Hz  
FIDRES 0.274439 Hz  
AQ 1.8219508 sec  
RG 23170.5  
DW 27.800 usec  
DE 6.50 usec  
TE 297.2 K  
D1 2.0000000 sec  
D11 0.0300000 sec  
CNO 1

===== CHANNEL f1 =====  
NUC1 13C  
P1 6.35 usec  
PL1 6.00 dB  
PL1W 95.19999655 W  
SFO1 75.4752948 MHz

===== CHANNEL f2 =====  
CDEPRO2 waltz16  
NUC2 1H  
PULP2 100.00 usec  
PL2 -2.50 dB  
PL12 19.50 dB  
PL13 19.50 dB  
PL2W 23.22754669 W  
PL12W 0.14655592 W  
PL13W 0.14655592 W  
SFO2 300.1312005 MHz  
SI 32768  
SF 75.4677490 MHz  
WDW EM  
SGB 0  
LB 0.60 Hz  
GB 0  
PC 1.40

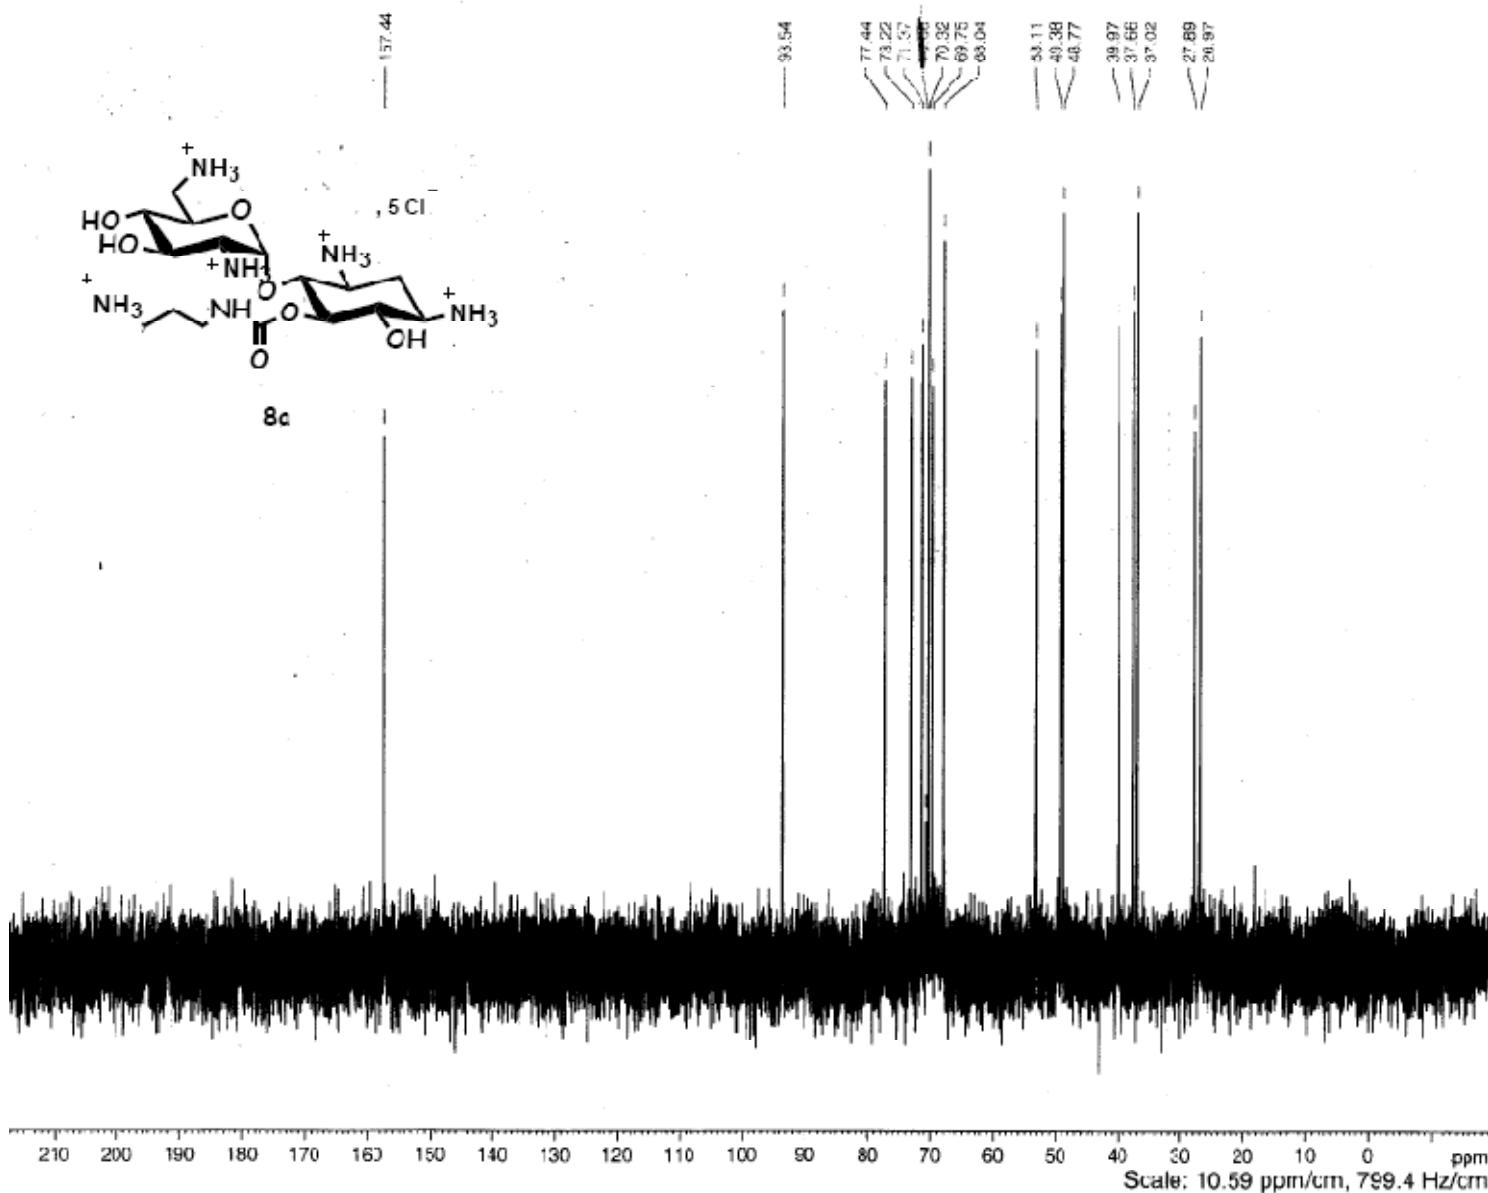

Scale: 10.59 ppm/cm, 799.4 Hz/cm

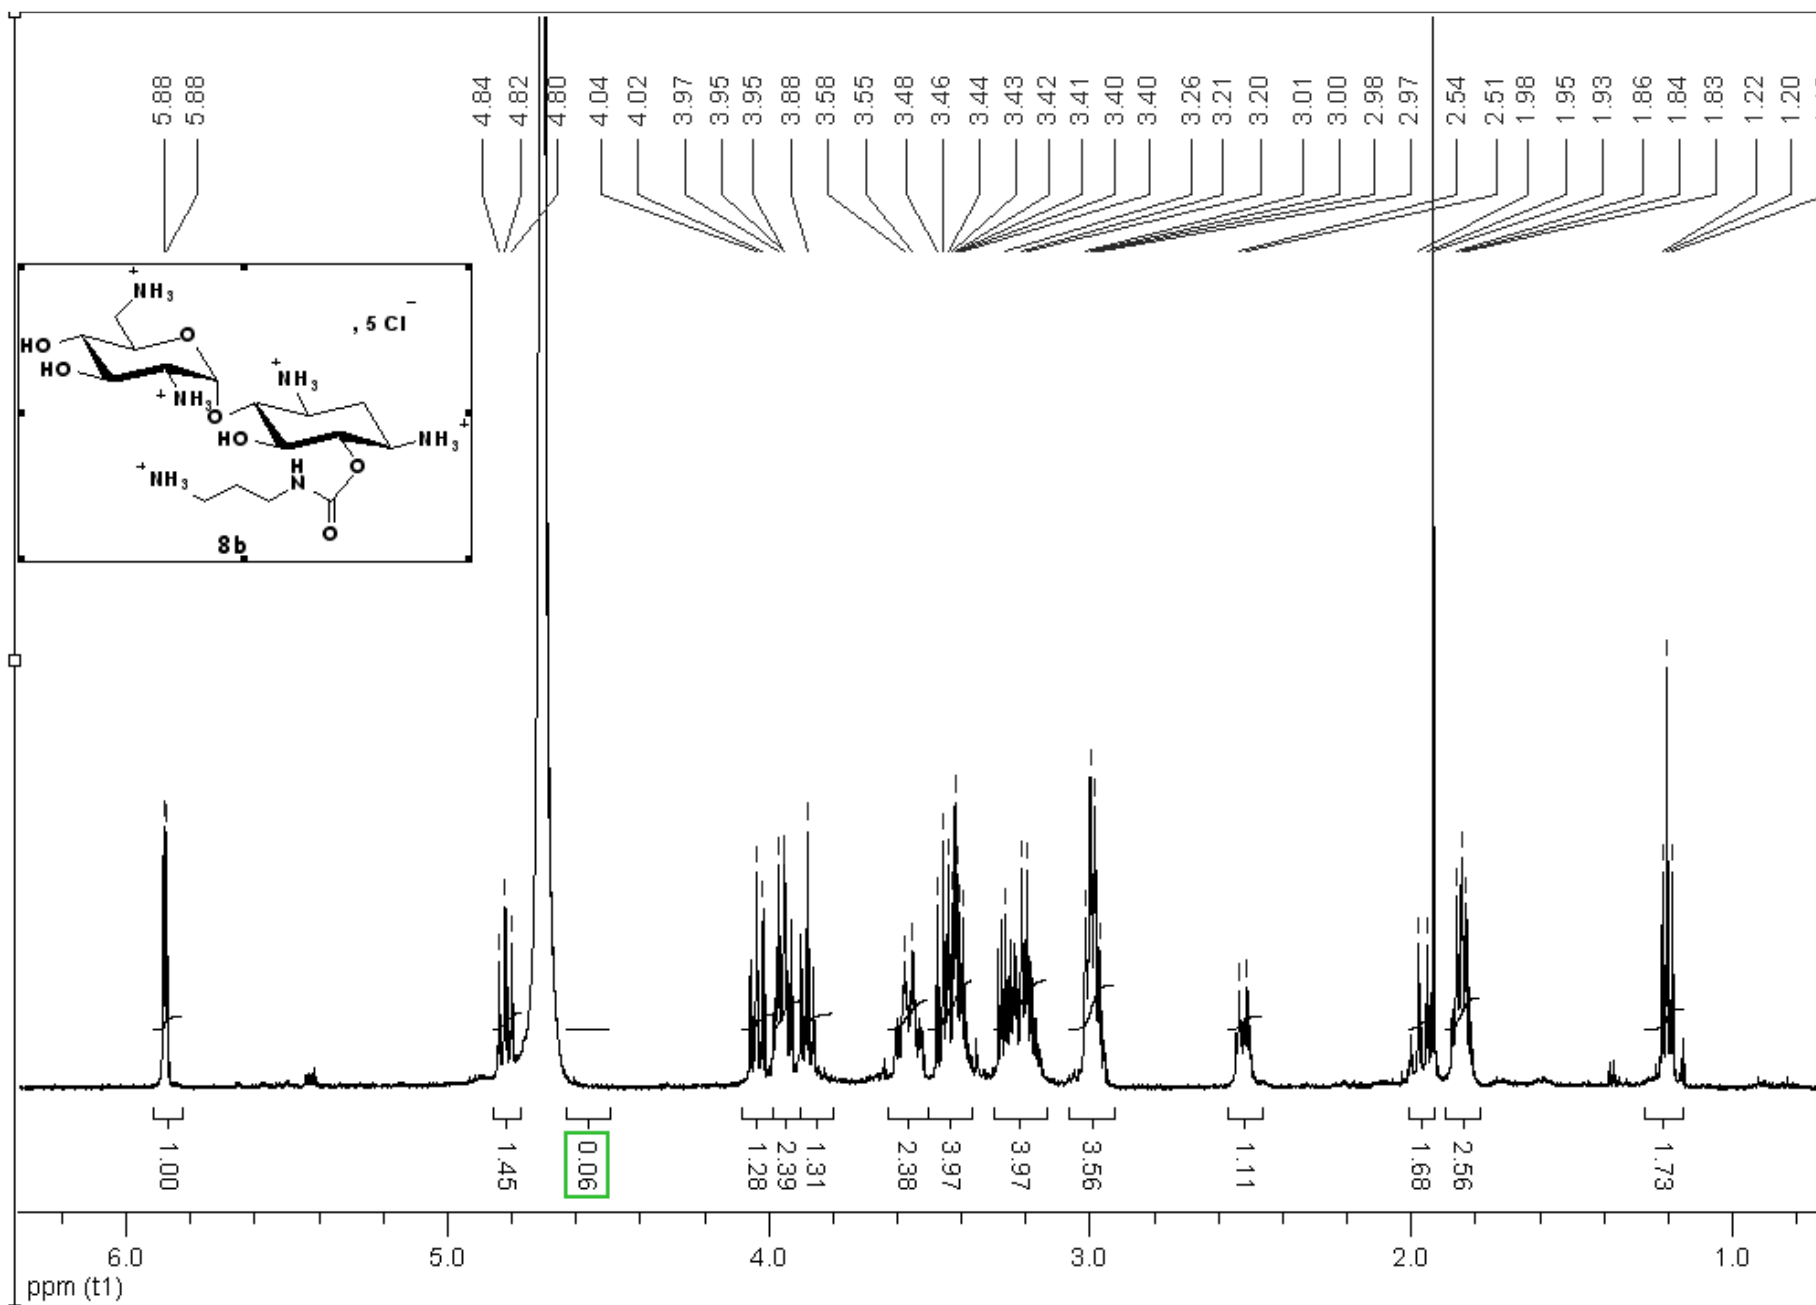

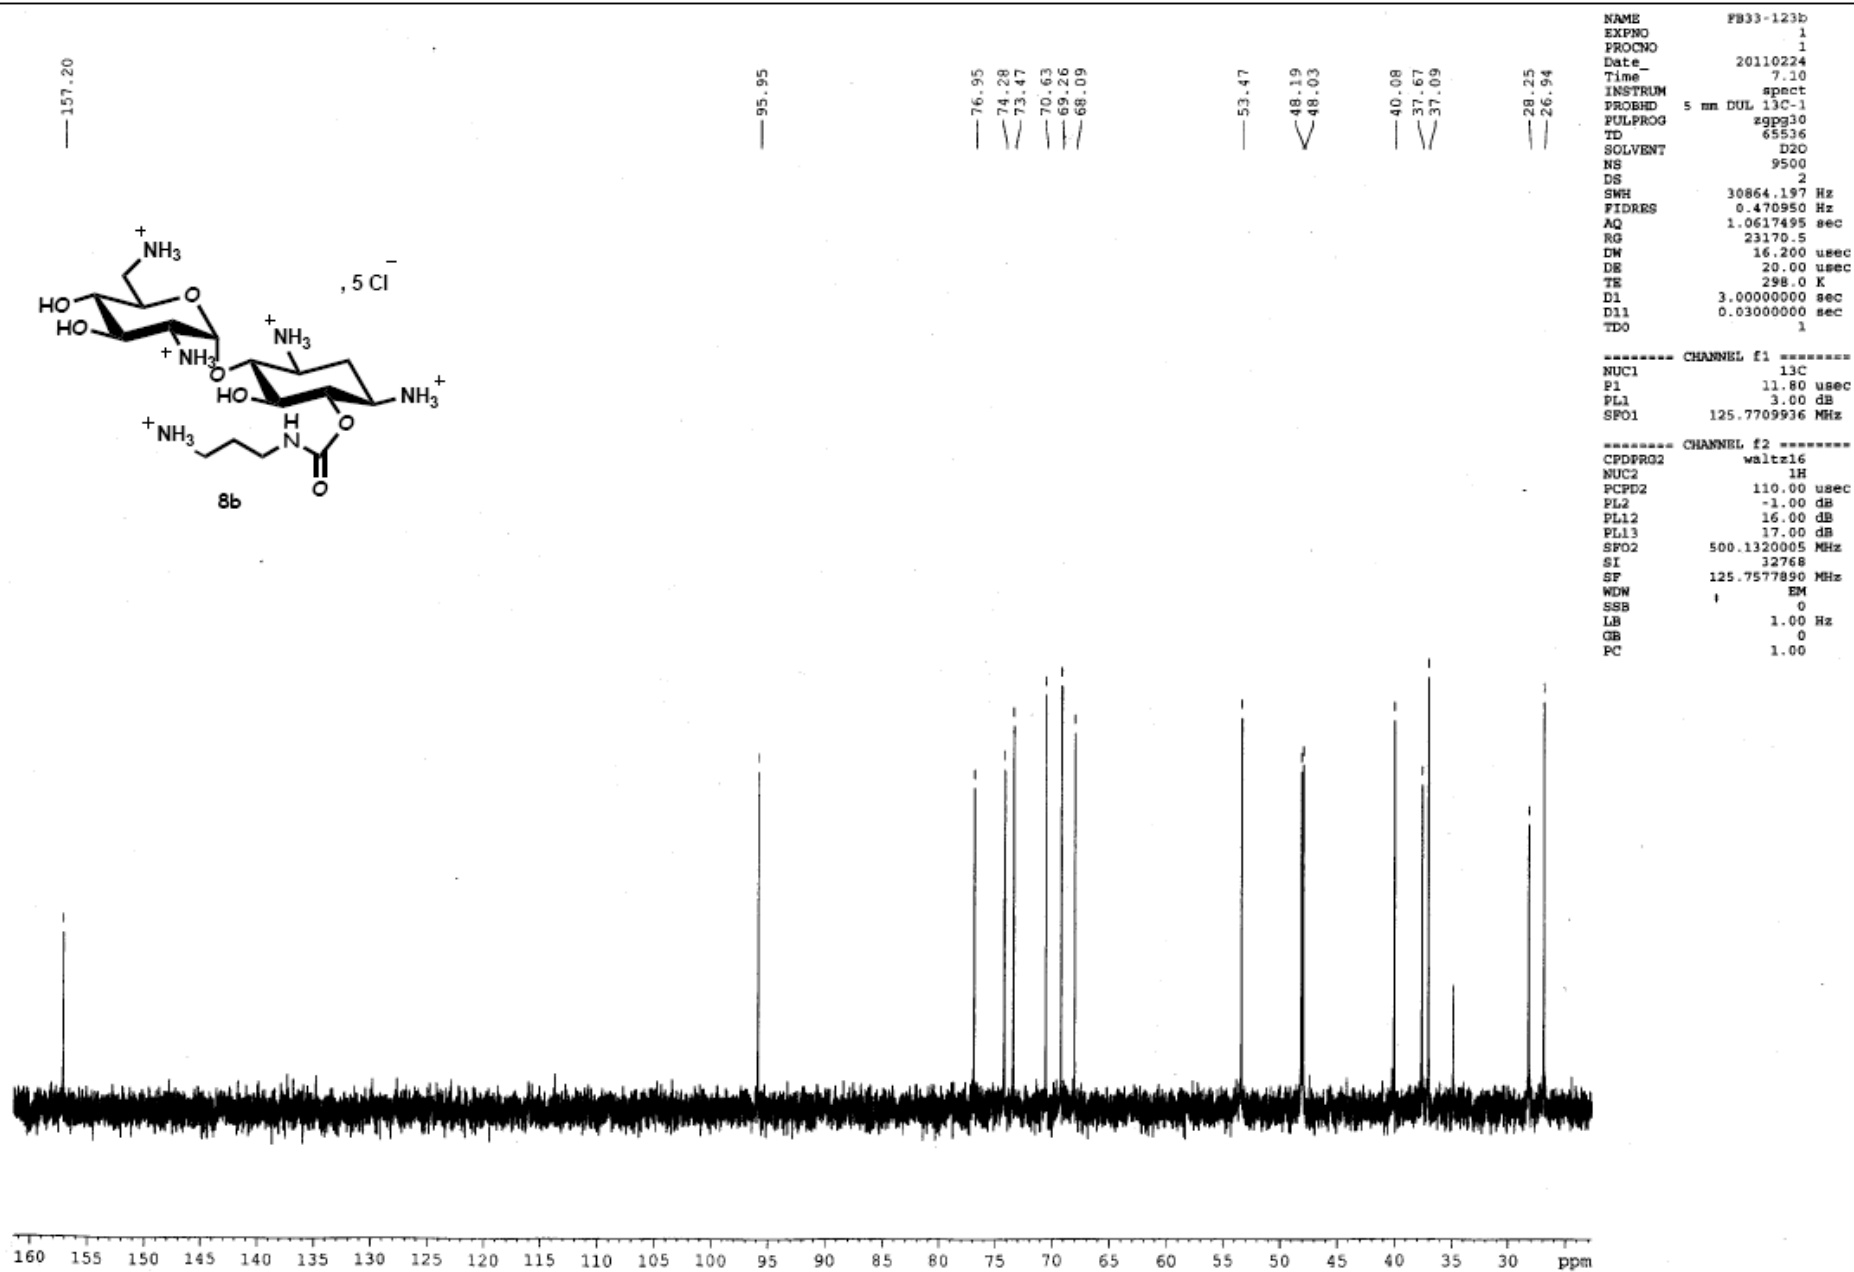

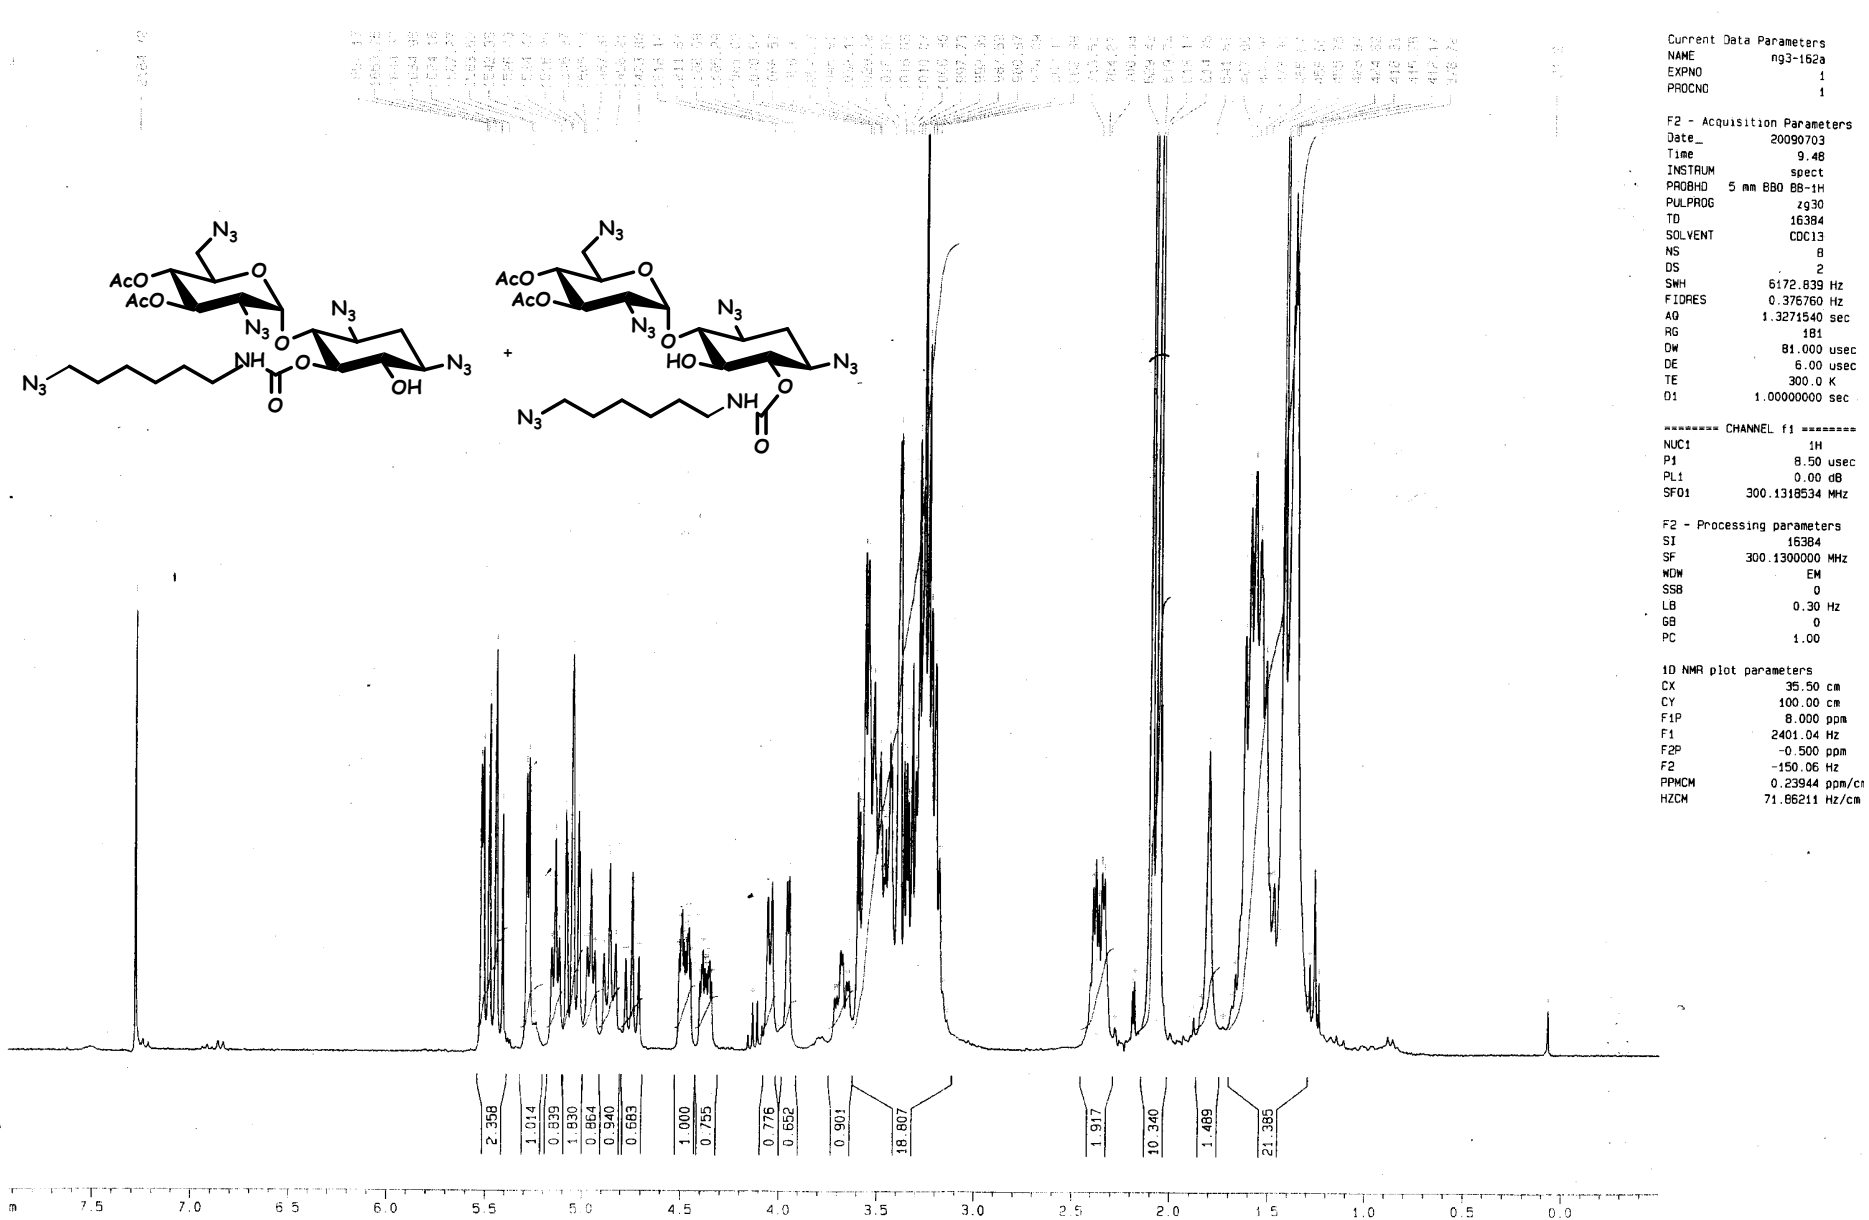

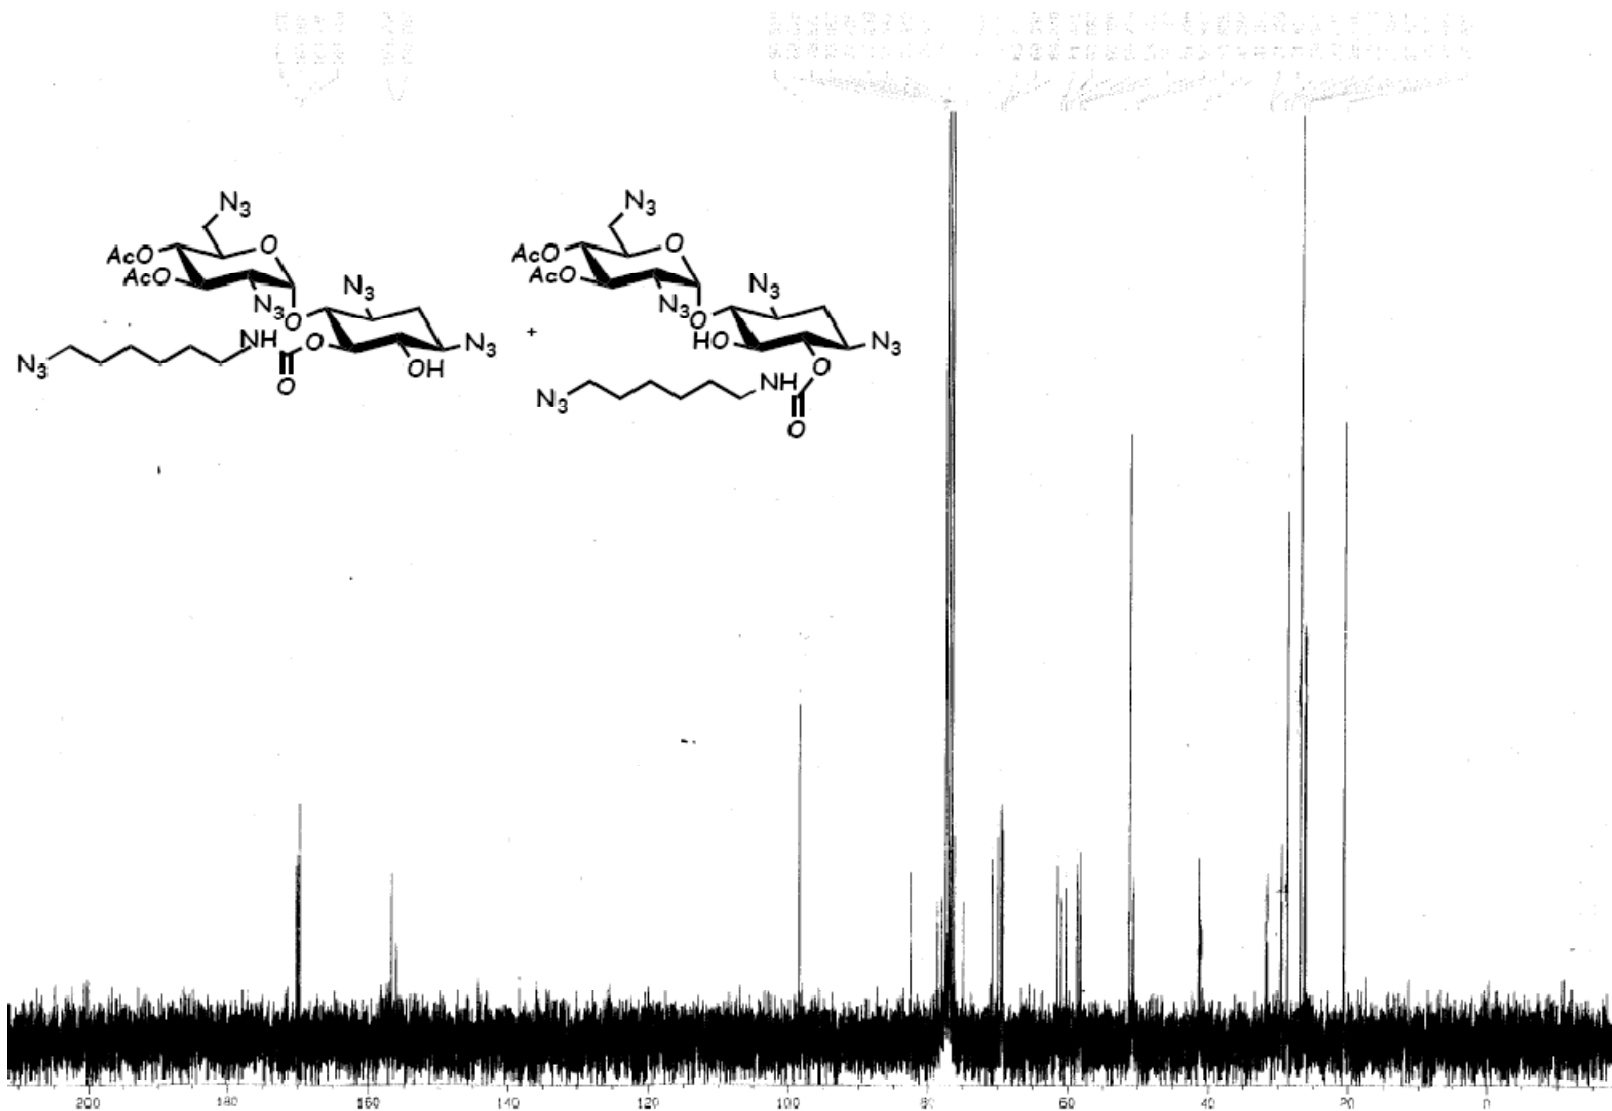

Current Data Parameters  
NAME ng3-162a  
EXPNO 2  
PROCNO 1

F2 - Acquisition Parameters  
Date\_ 20090703  
Time 9.55  
INSTRUM spect  
PROBHD 5 mm BBO BB-1H  
PULPROG zgpg30  
TD 32768  
SOLVENT CDCl3  
NS 170  
DS 2  
SWH 17965.611 Hz  
FIDRES 0.548877 Hz  
AQ 0.9110004 sec  
RG 11985.2  
Dw 27.800 usec  
DE 6.00 usec  
TE 300.0 K  
D1 2.0000000 sec  
d11 0.0300000 sec  
d12 0.0002000 sec

\*\*\*\*\* CHANNEL f1 \*\*\*\*\*  
NUC1 13C  
P1 5.20 usec  
PL1 -6.00 dB  
SFO1 75.4752953 MHz

\*\*\*\*\* CHANNEL f2 \*\*\*\*\*  
CROPRG2 waltz16  
NUC2 1H  
PCPRG2 80.00 usec  
PL2 -6.00 dB  
PL12 20.00 dB  
PL13 20.00 dB  
SFO2 300.1312005 MHz

F2 - Processing parameters  
SI 32768  
SF 75.4677490 MHz  
WDW EM  
SSB 0  
LB 0.55 Hz  
GB 0  
PC 1.40

1D MFT D10t parameters  
CX 35.50 cm  
CY 20.00 cm  
F1P 215.200 ppm  
F1 16240.66 Hz  
F2P -20.000 ppm  
F2 -1509.35 Hz  
PPMCM 6.62535 ppm/cm  
HZCM 500.00040 Hz/cm



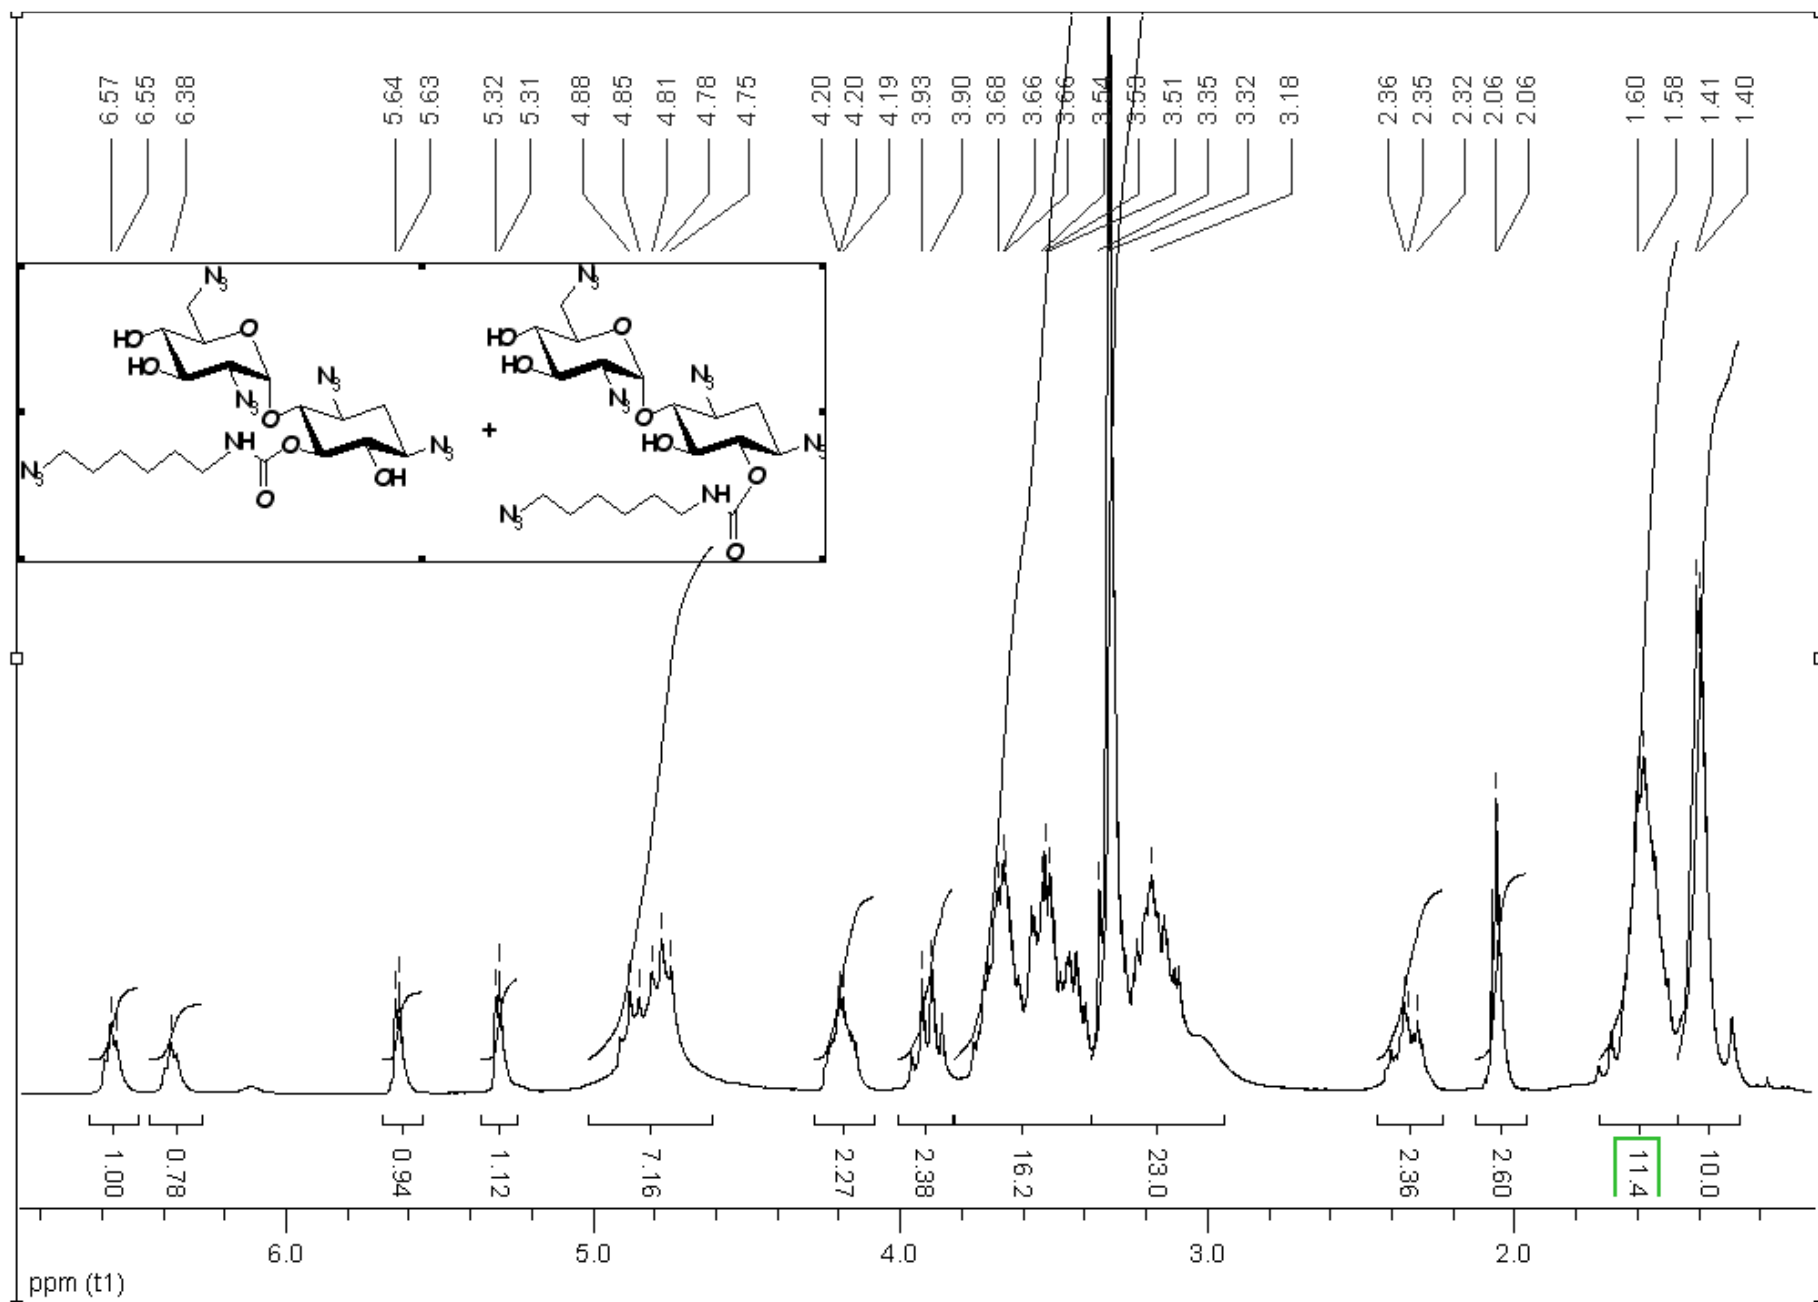

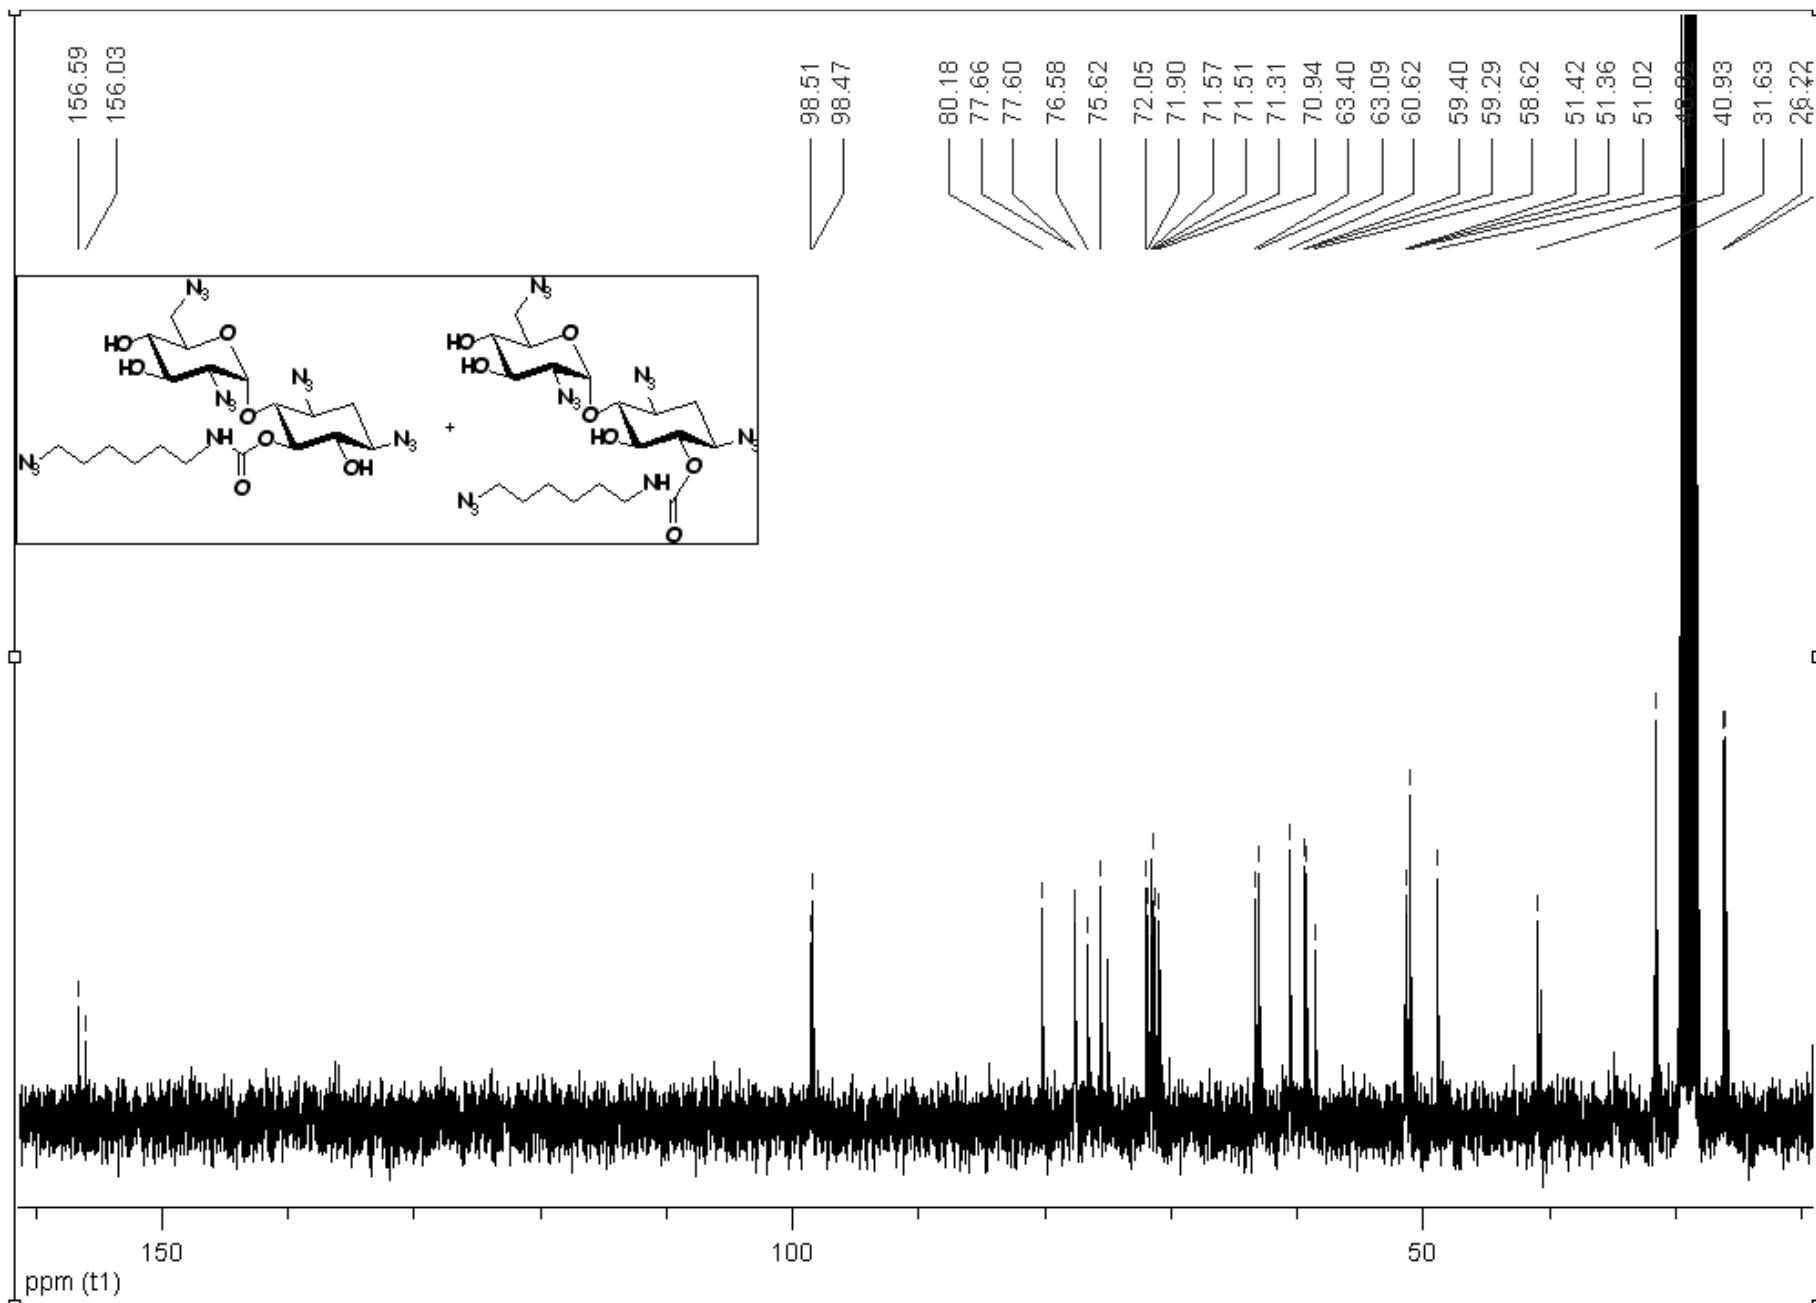

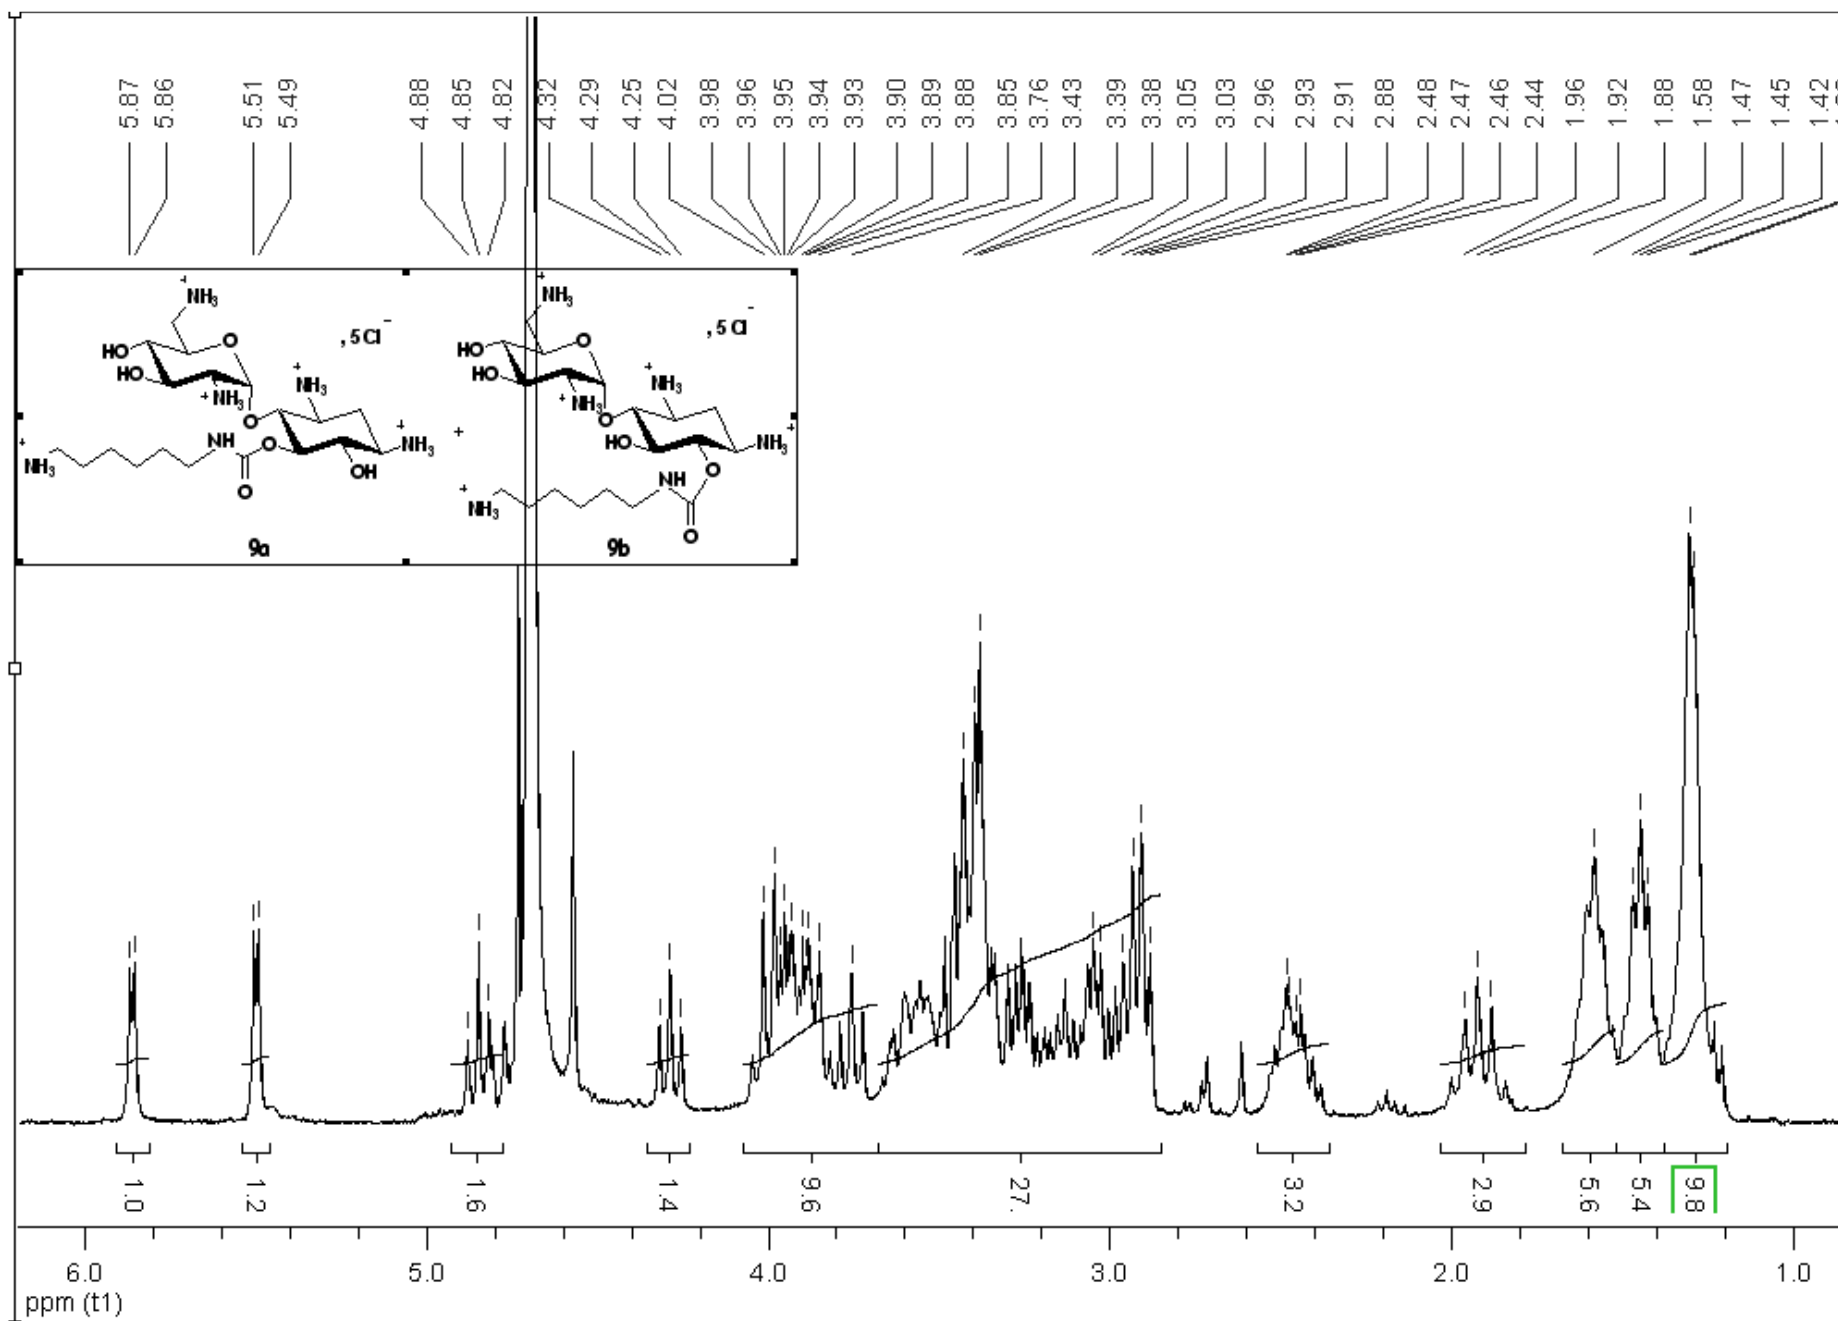

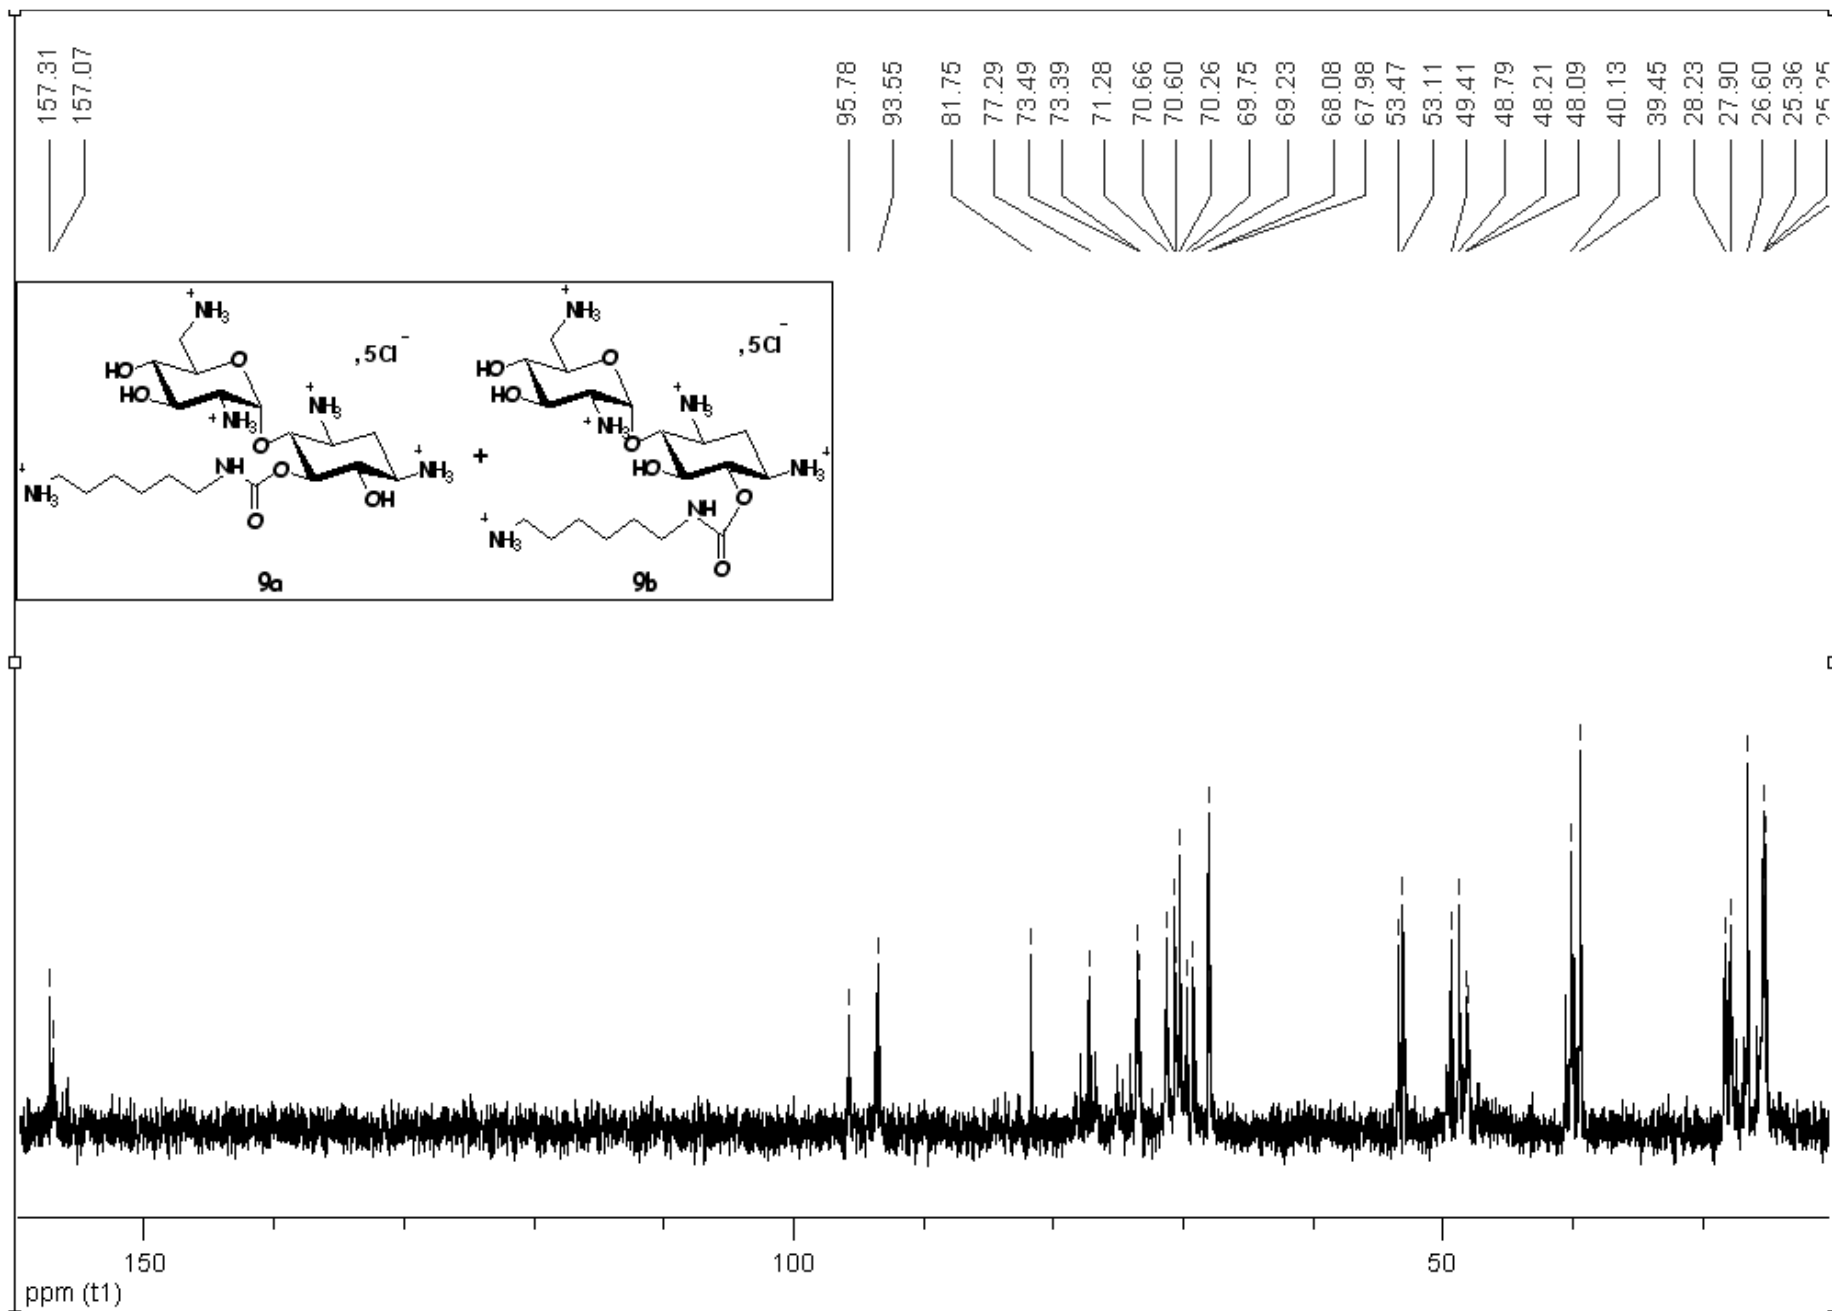

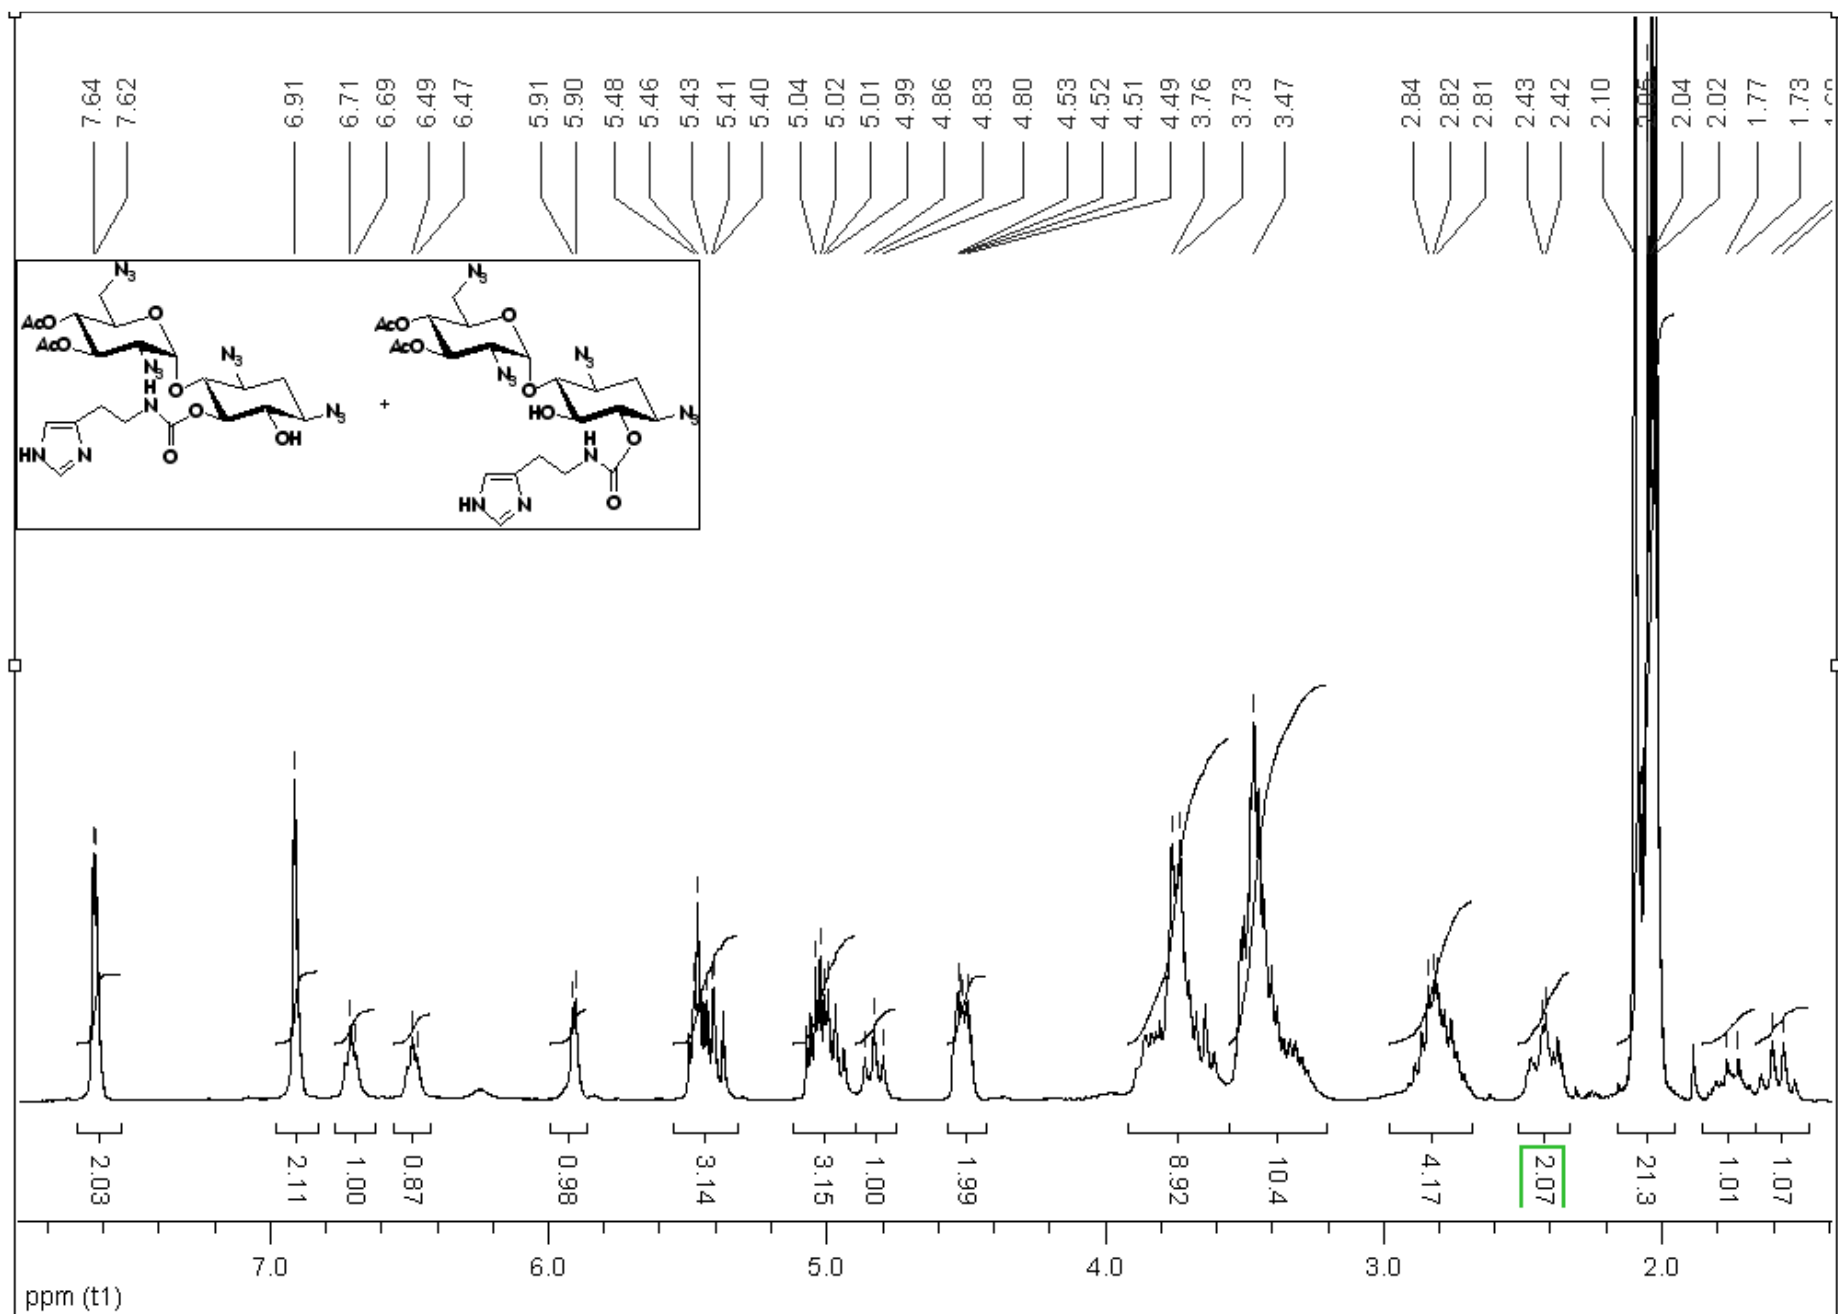

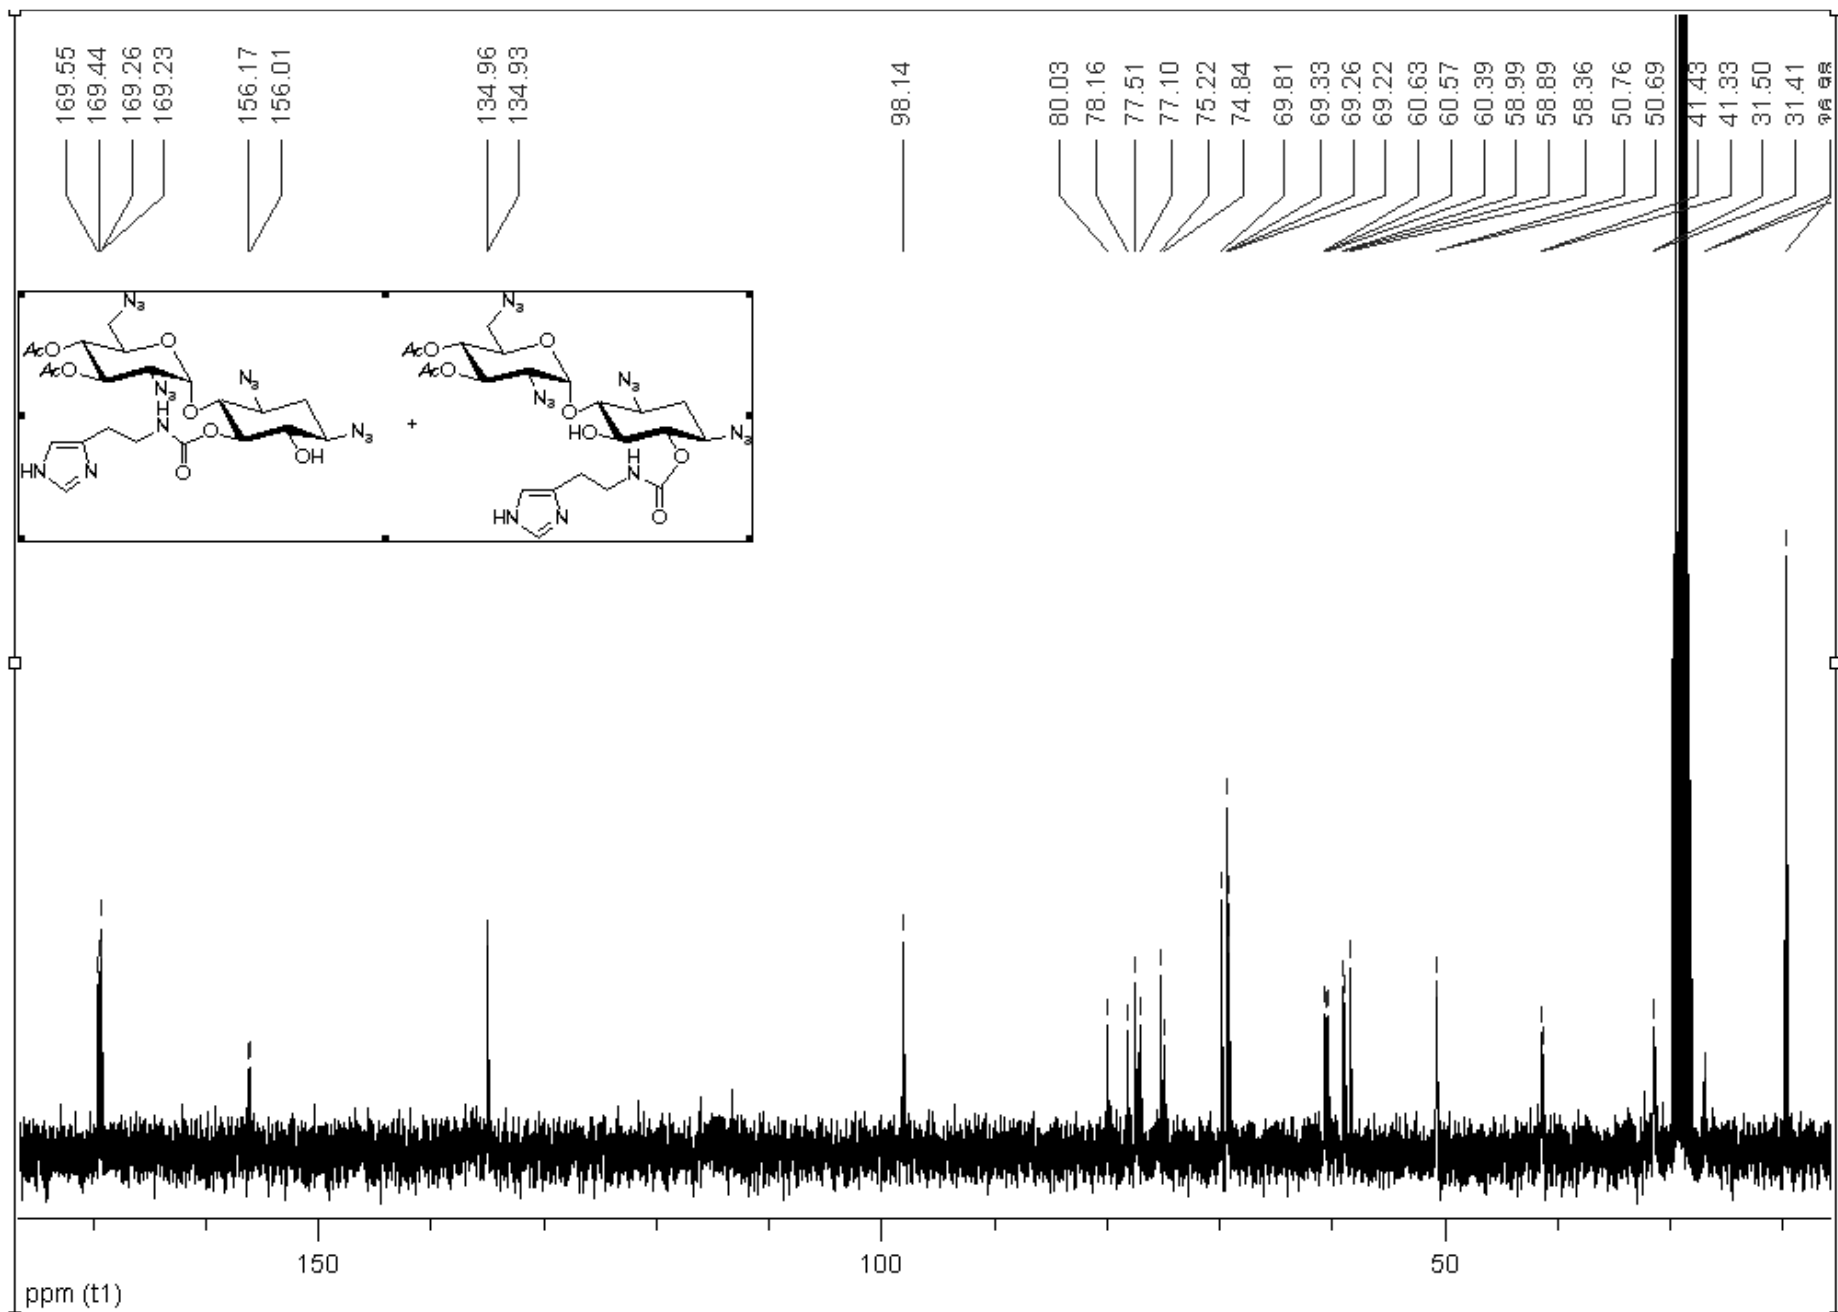

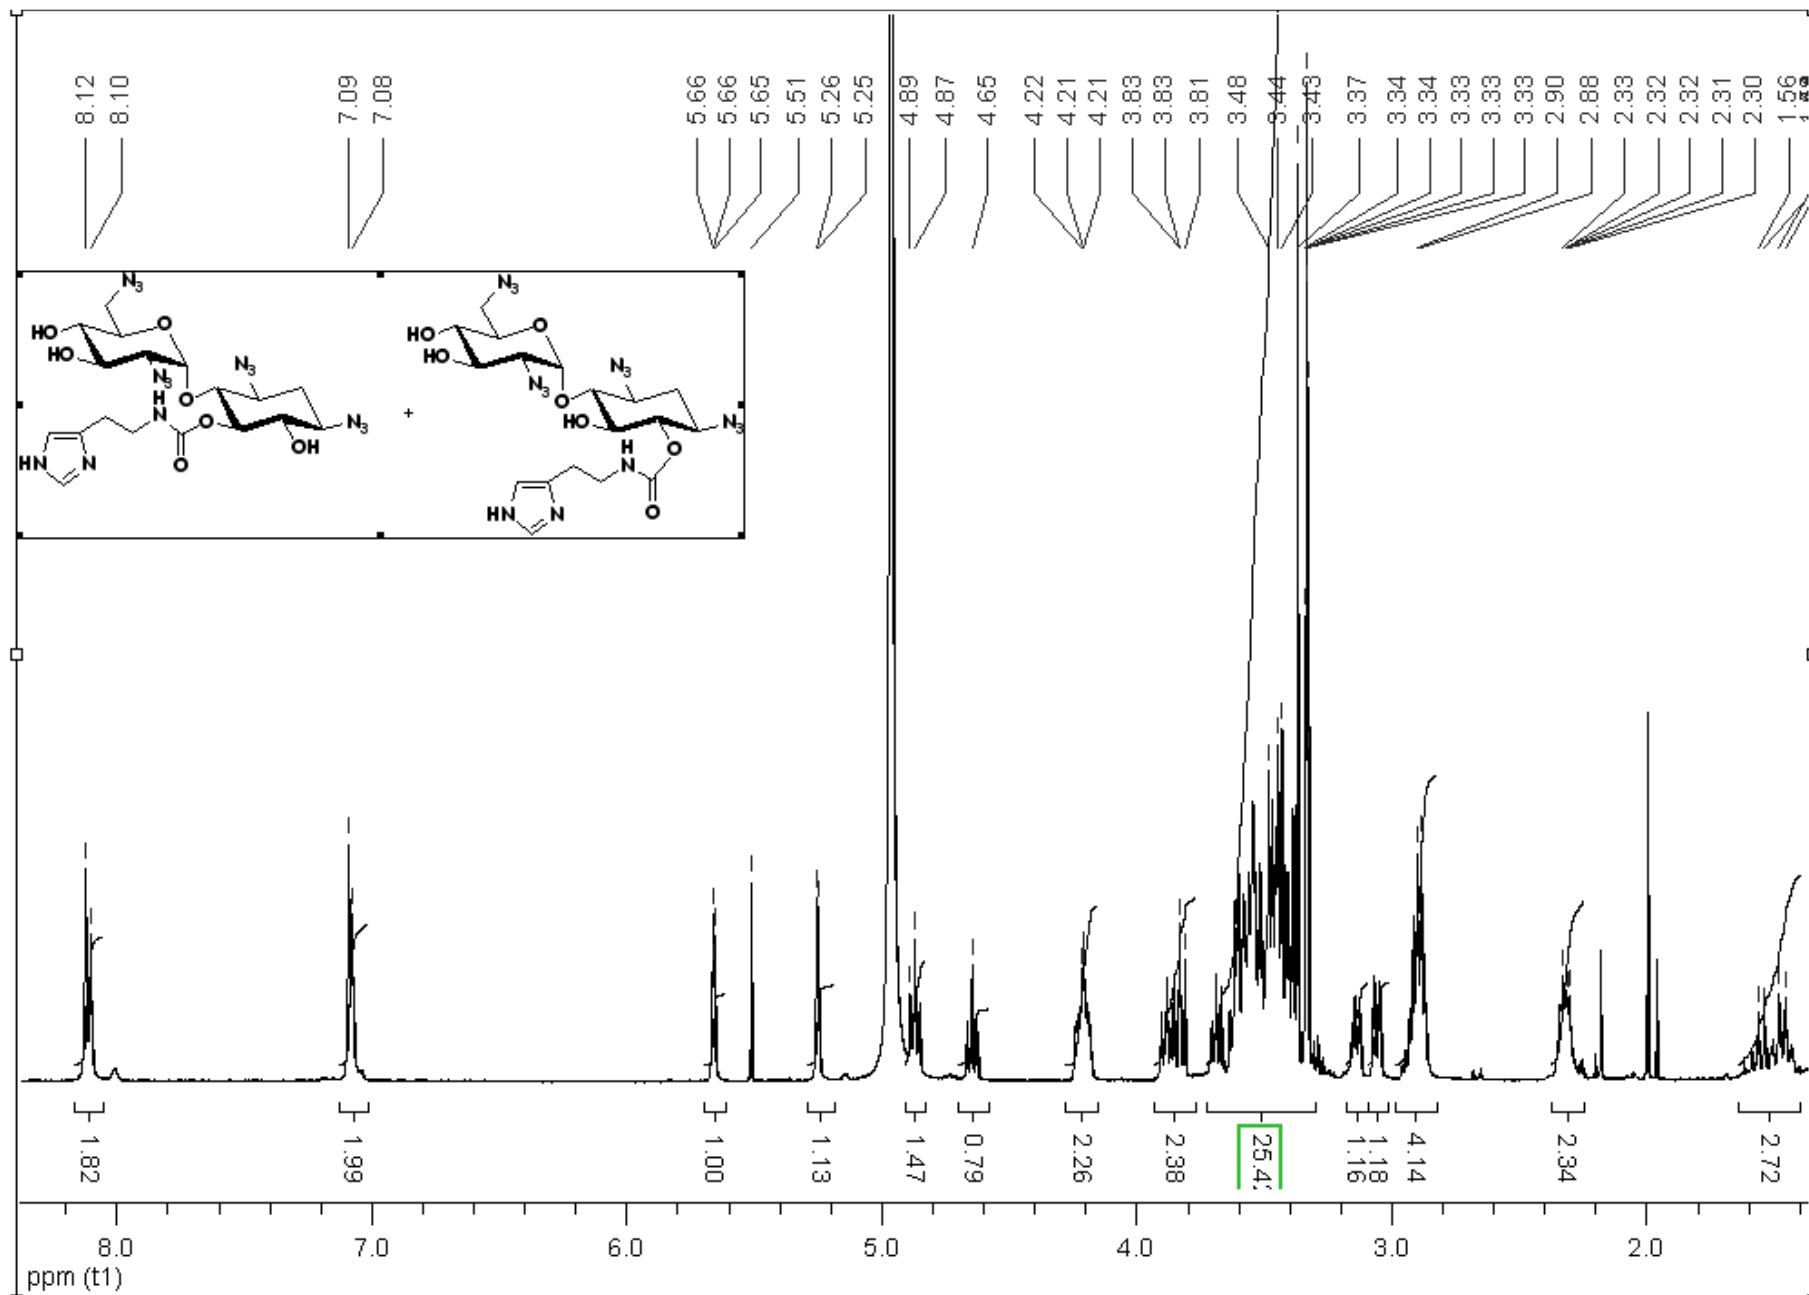

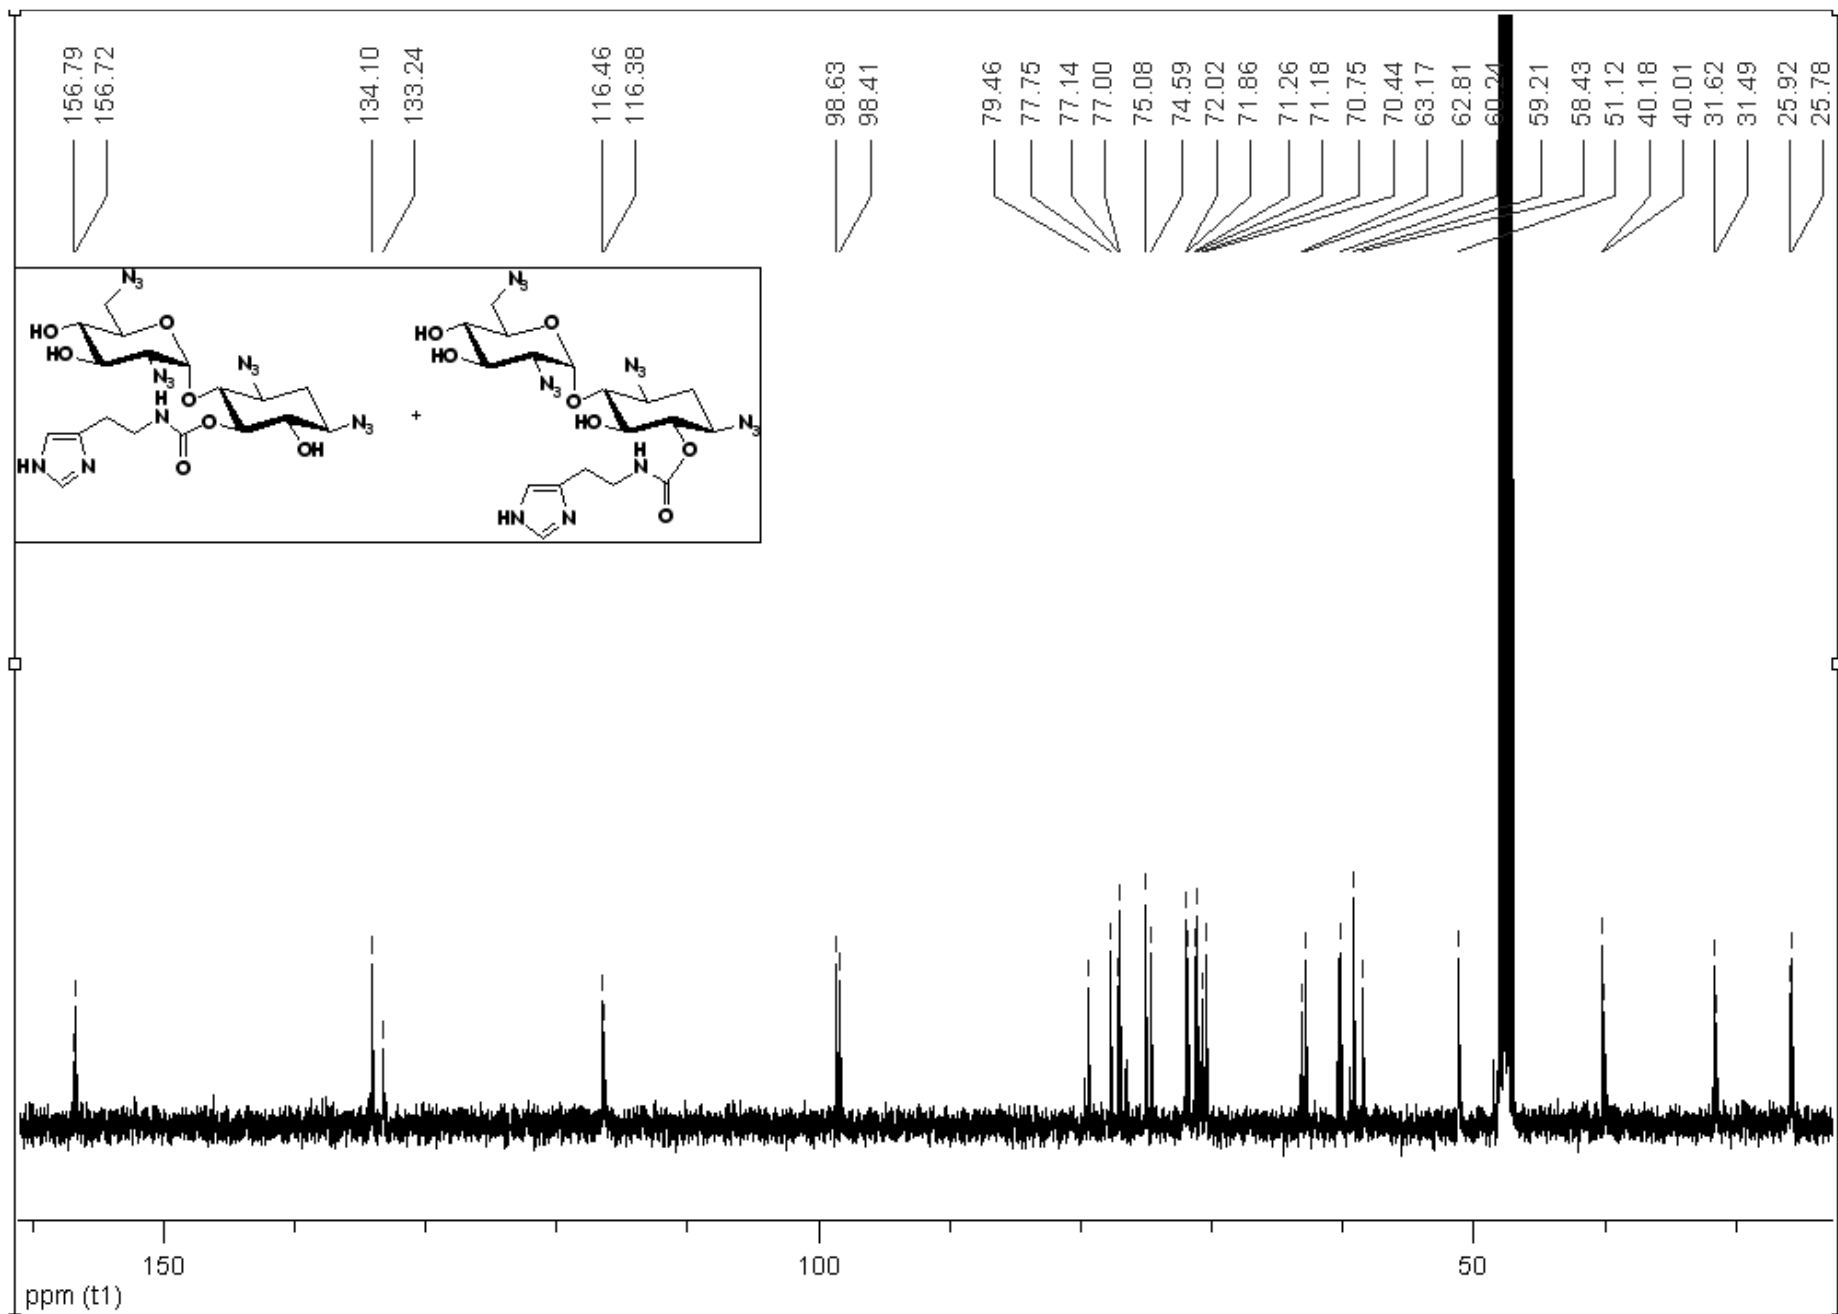



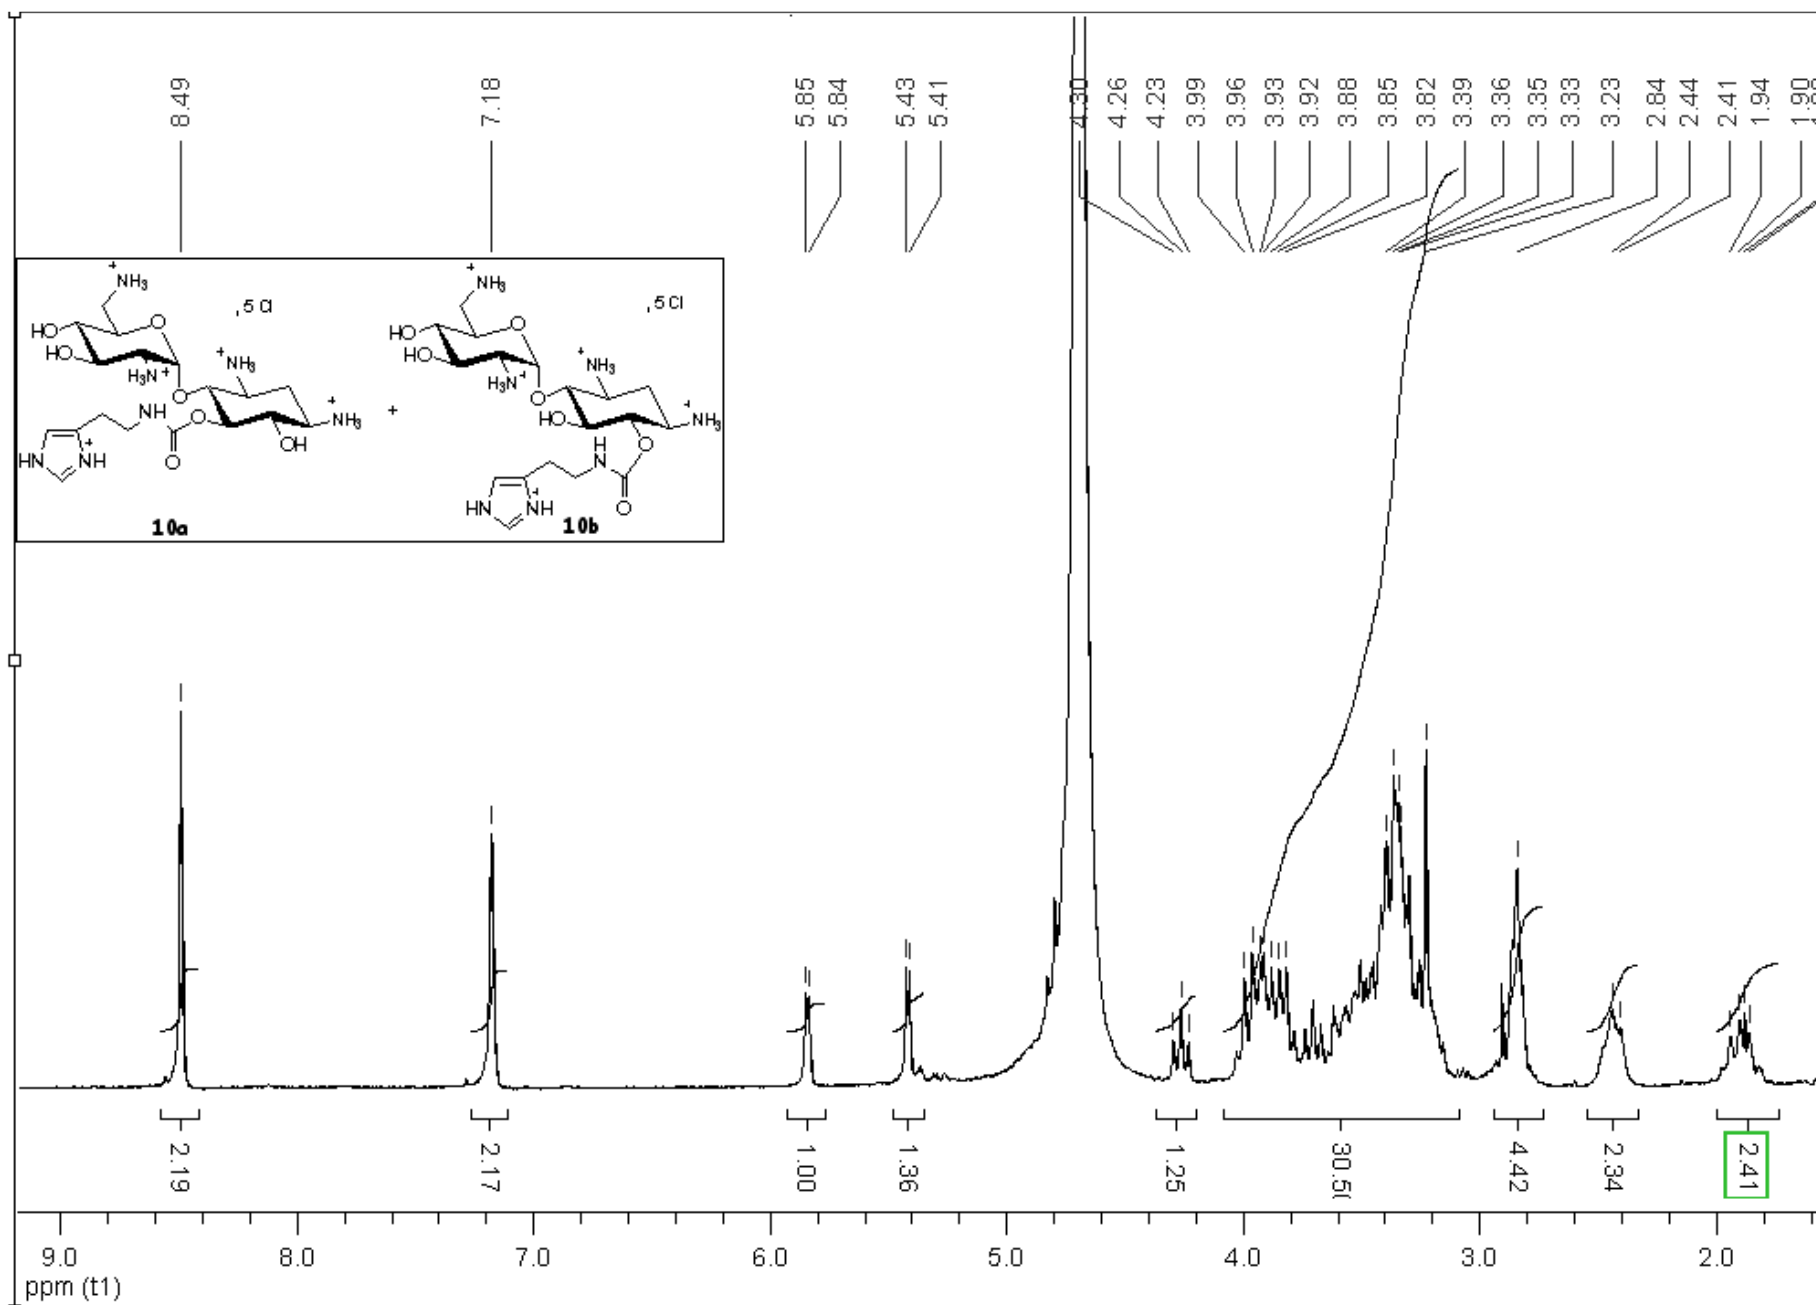

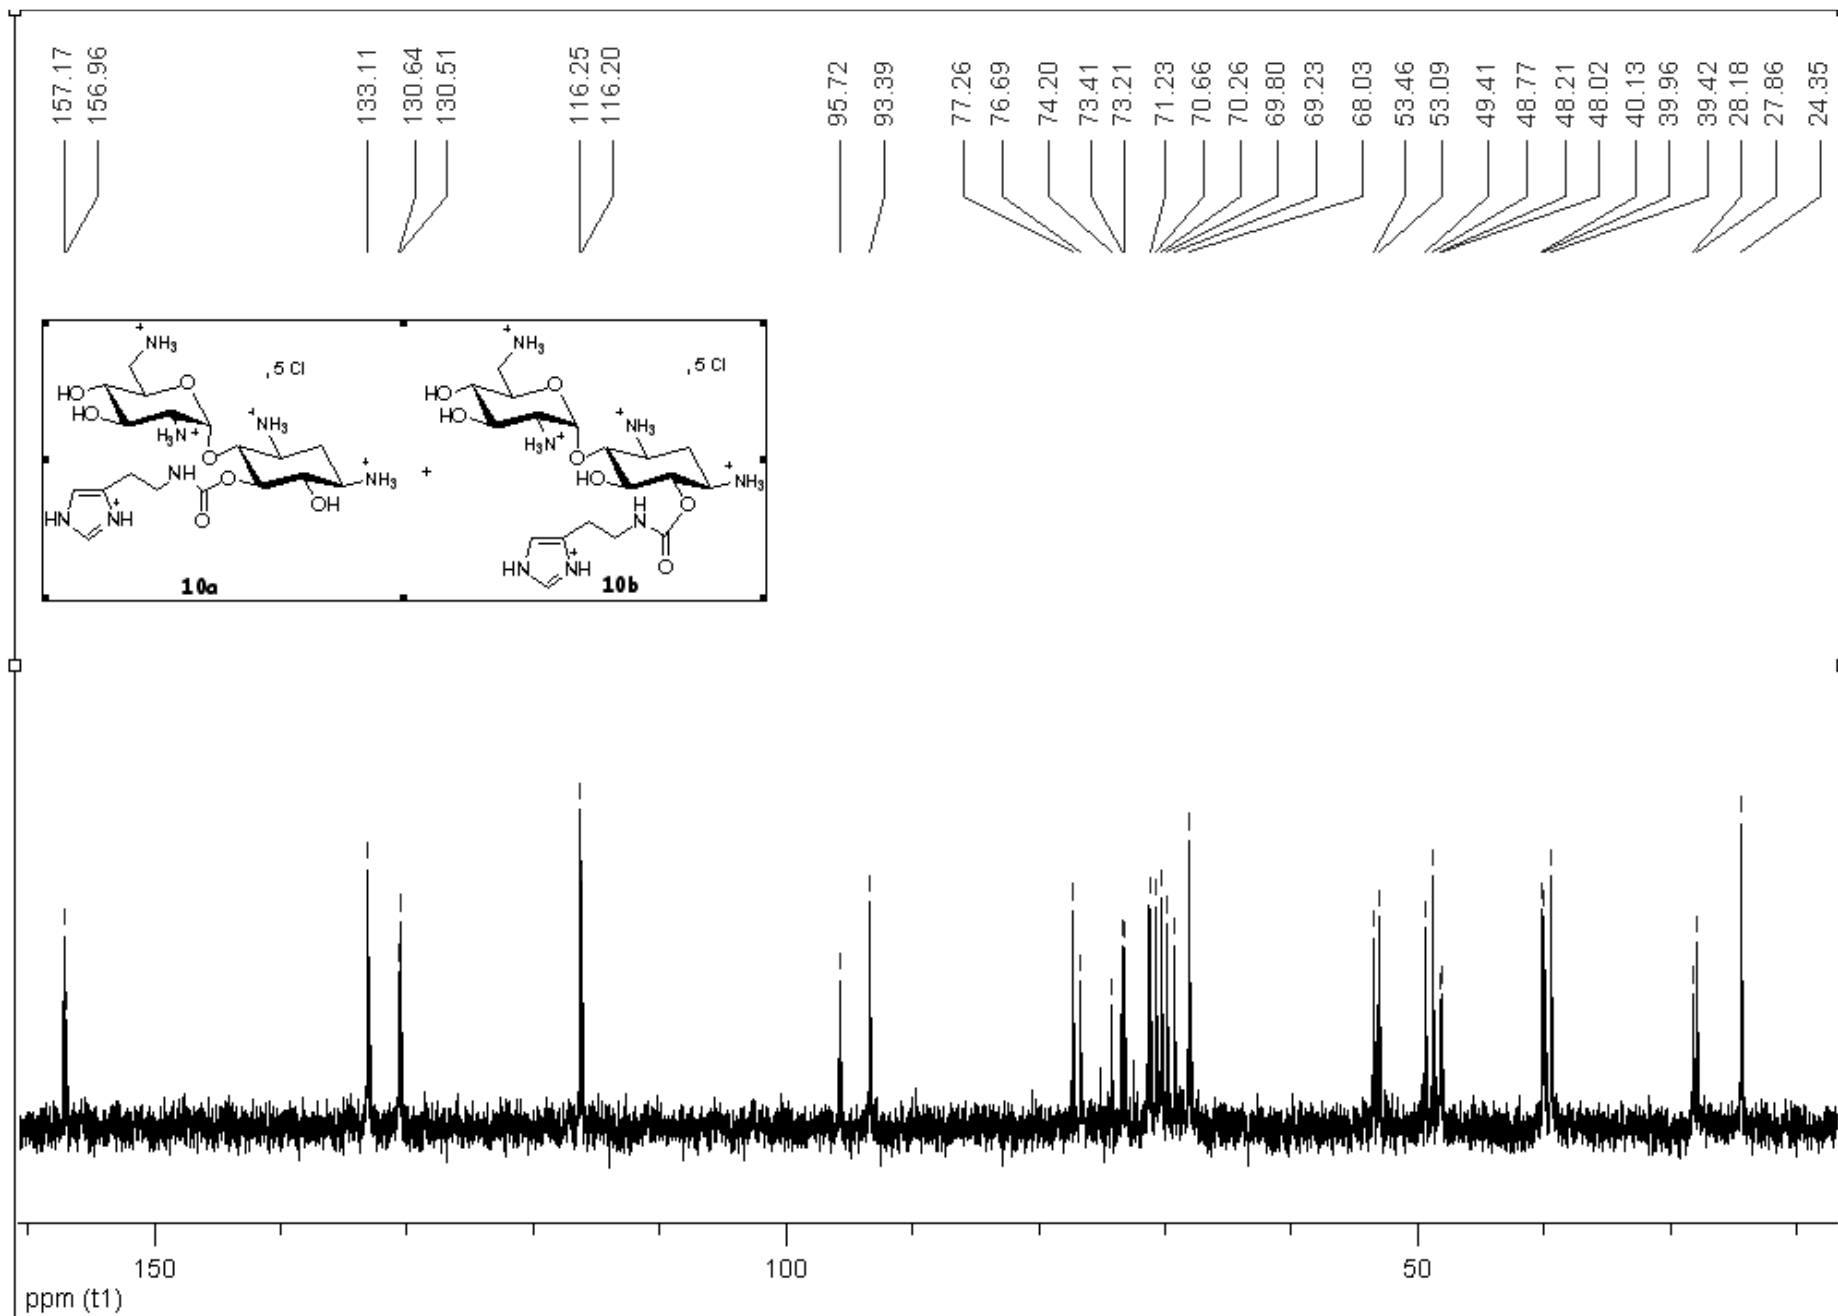

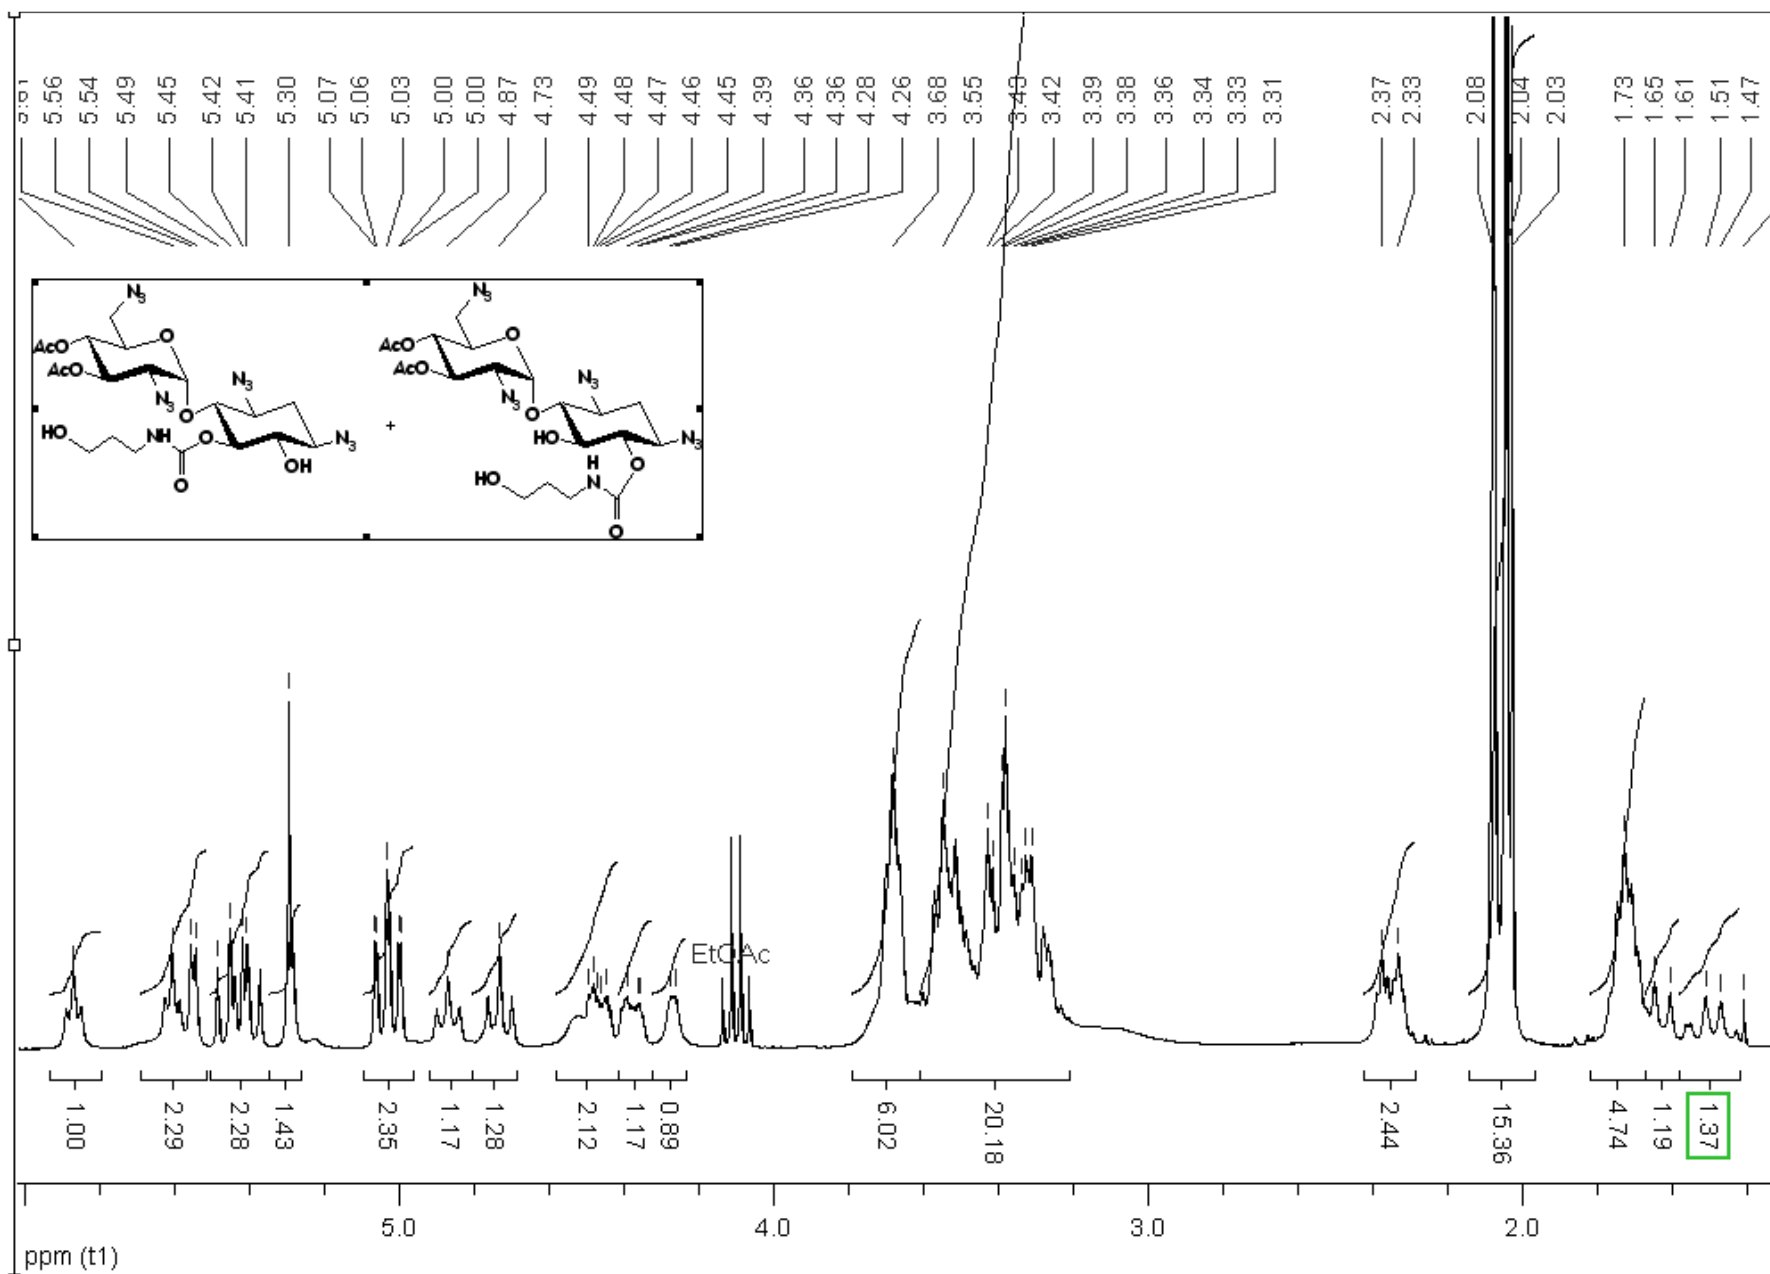

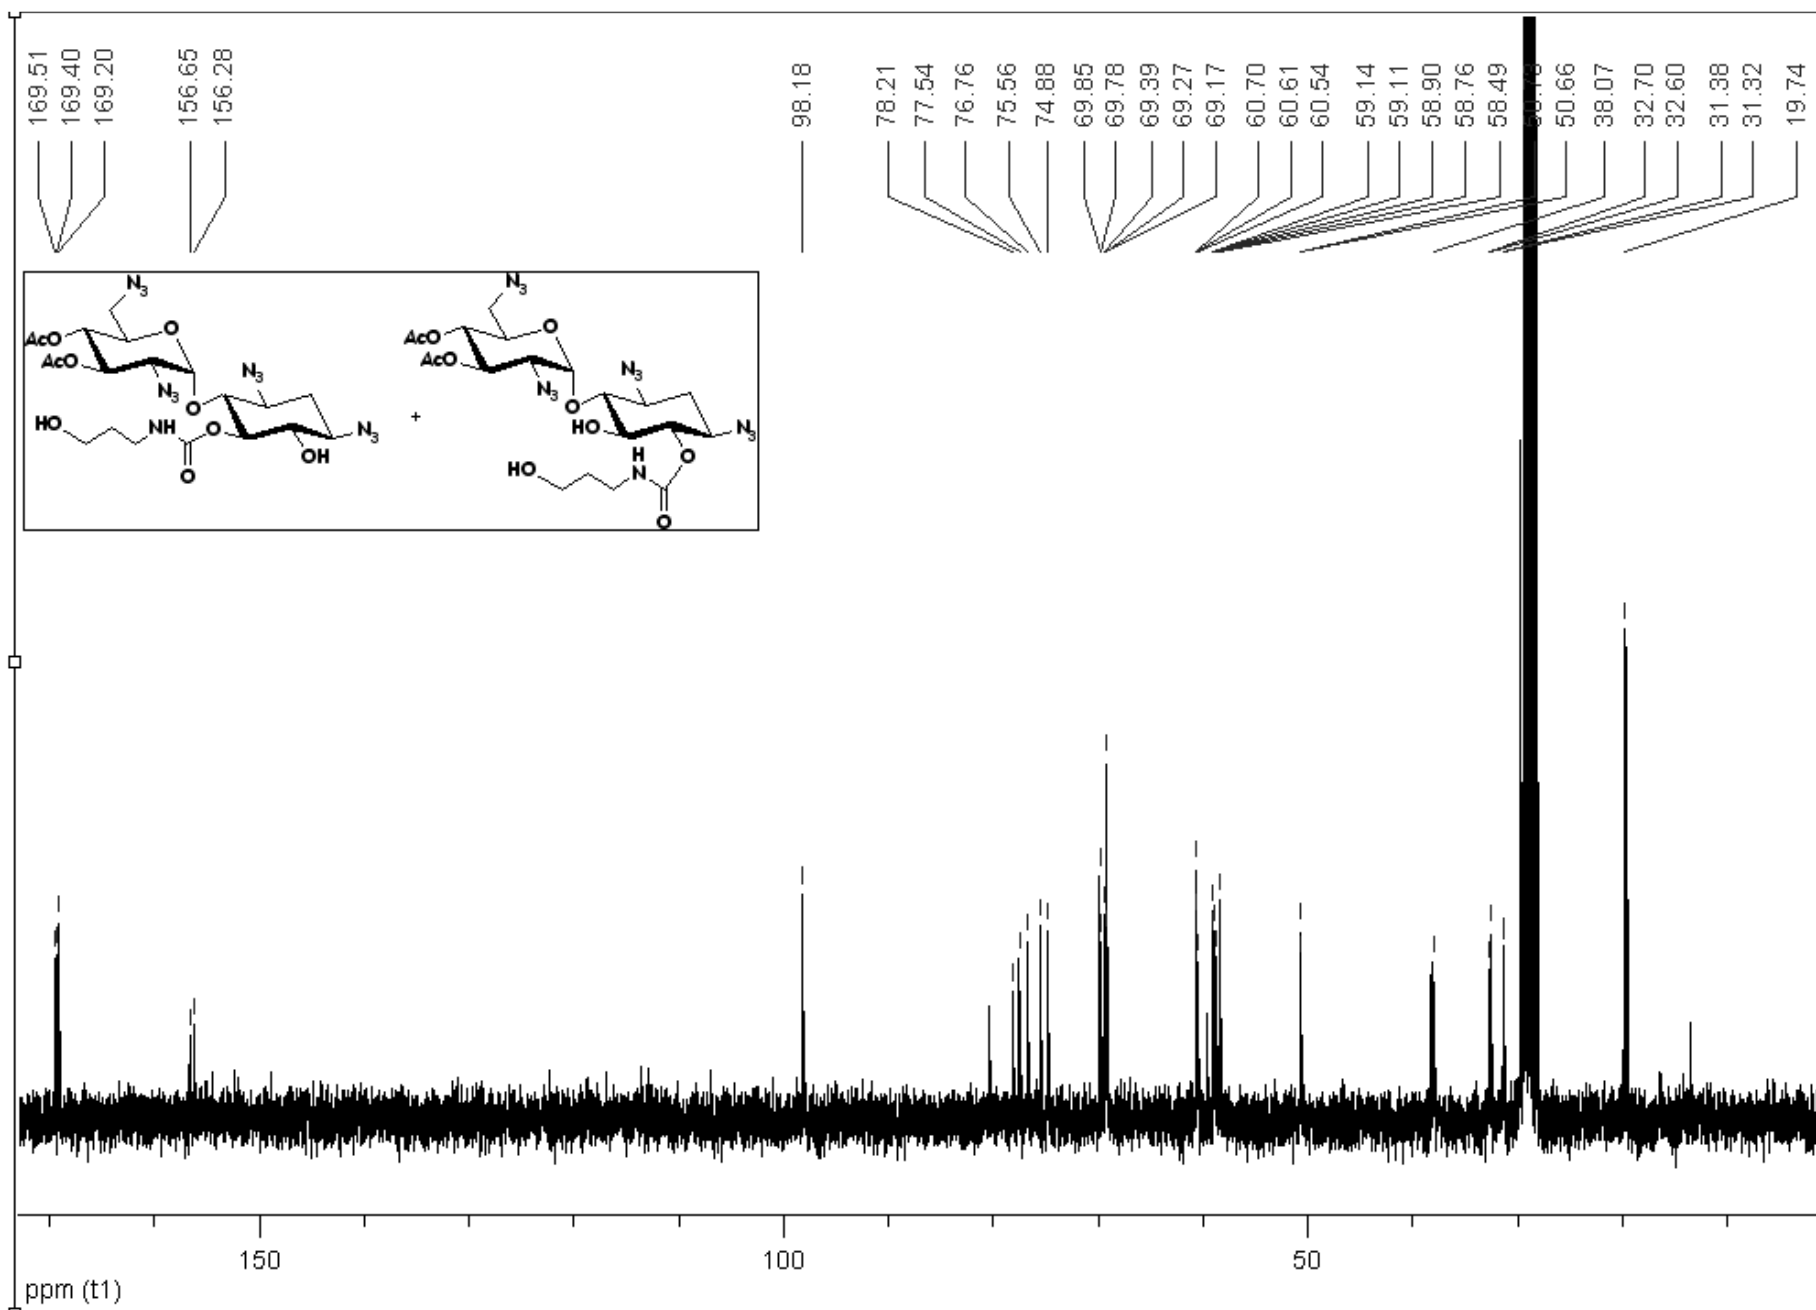



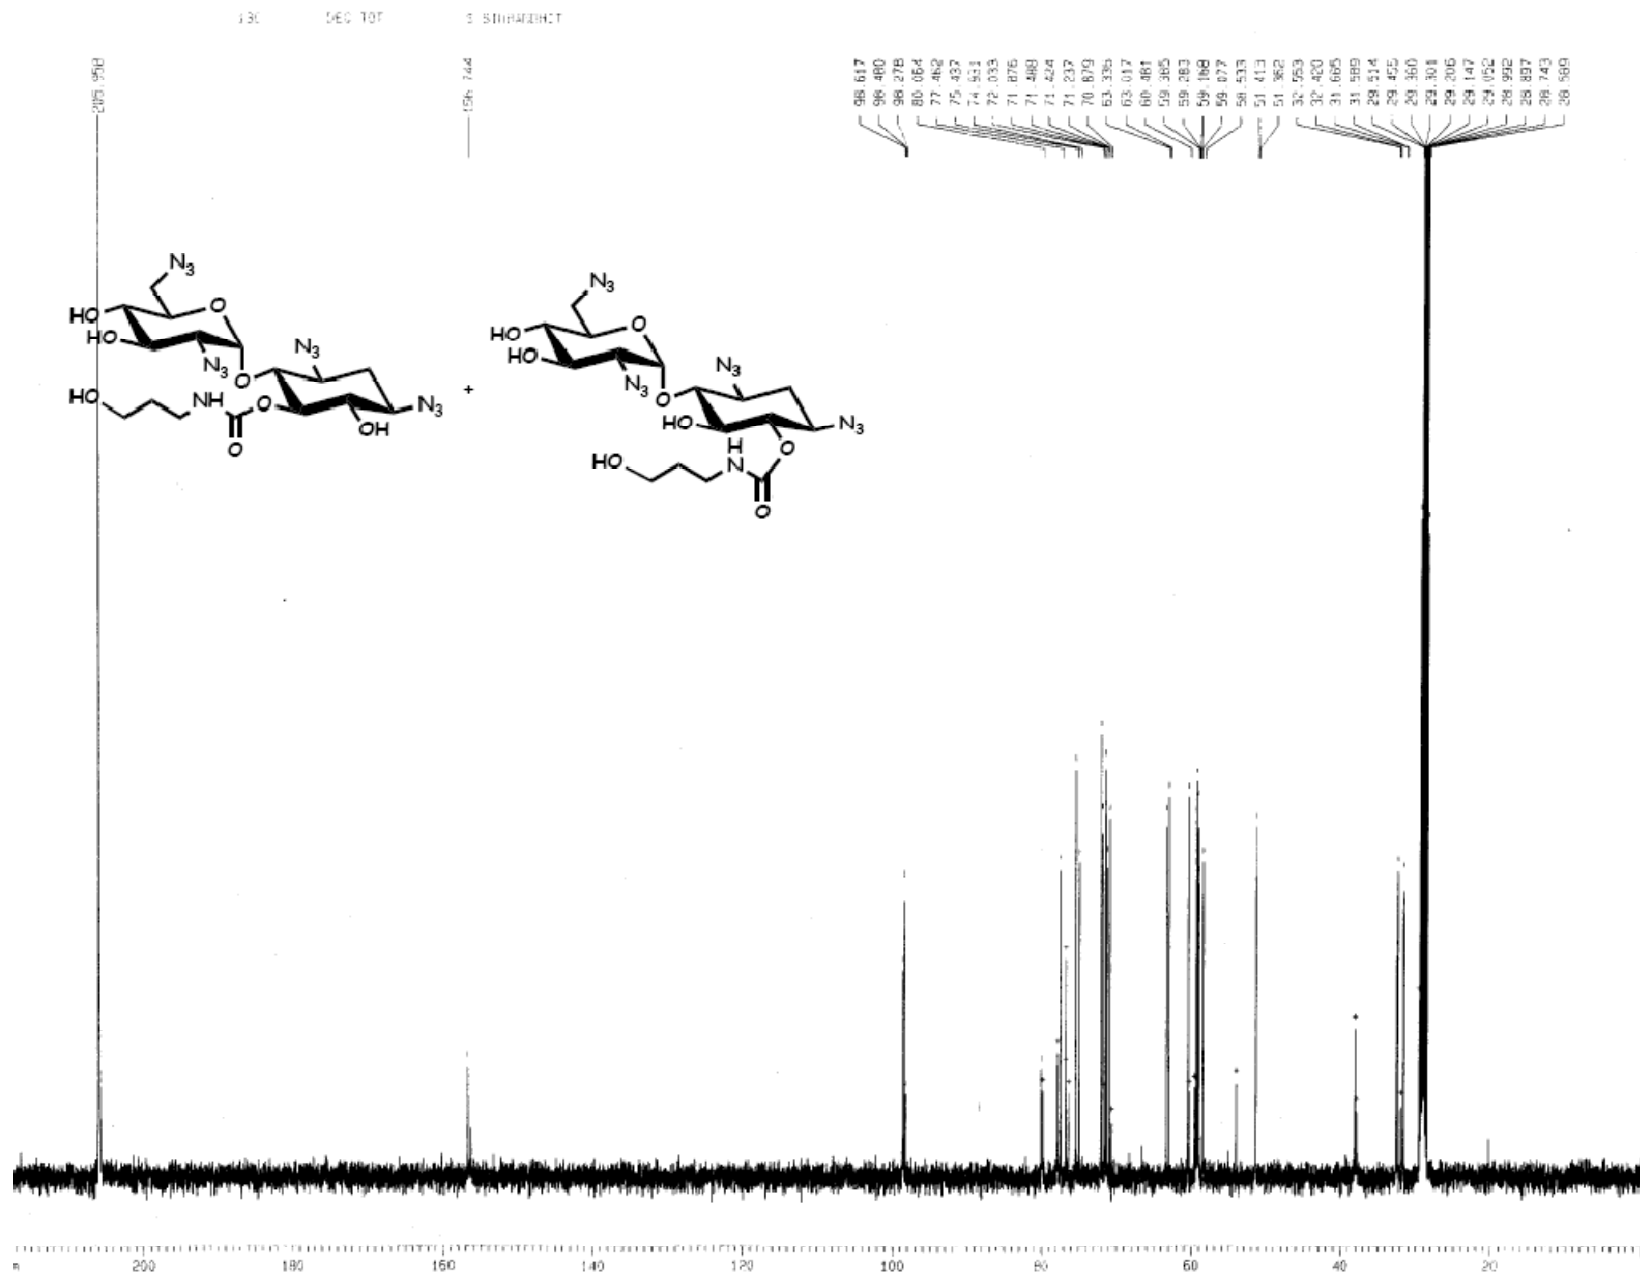

Current Data Parameters  
 NAME ng3-92a  
 EXPNO 2  
 PROCNO 1

F2 - Acquisition Parameters  
 Date\_ 20090408  
 Time 10.52  
 INSTRUM spect  
 PROBHD 5 mm QNP 13C/1  
 PULPROG zgpg30  
 TO 69.35  
 SOLVENT CDCl3  
 NS 95  
 DS 4  
 SWH 30103.030 Hz  
 FIDRES 0.462368 Hz  
 AQ 1.0914105 sec  
 RG 18390.4  
 DW 16.500 usec  
 DE 20.00 usec  
 TE 300.0 K  
 D1 3.00000000 sec  
 d11 0.03000000 sec  
 d12 0.00002000 sec

----- CHANNEL f1 -----  
 NU1 13C  
 P1 9.40 usec  
 PL1 4.00 dB  
 SF01 125.7716224 MHz

----- CHANNEL f2 -----  
 CPDPRG2 waltz16  
 NU2 1H  
 P2 100.00 usec  
 PL2 0.00 dB  
 PL12 17.00 dB  
 PL13 17.00 dB  
 SF02 500.1320005 MHz

F2 - Processing parameters  
 SI 32768  
 SF 125.7578956 MHz  
 MDW EM  
 SSB 0  
 LB 1.00 Hz  
 GB 0  
 PC 1.00

3D NMR plot parameters  
 CX 35.00 cm  
 CY 100.00 cm  
 F1P 820.000 ppm  
 F1 27866.71 Hz  
 F2P -0.500 ppm  
 F2 -62.88 Hz  
 PPMX 6.30000 ppm/cm  
 XZCM 792.27405 Hz/cm

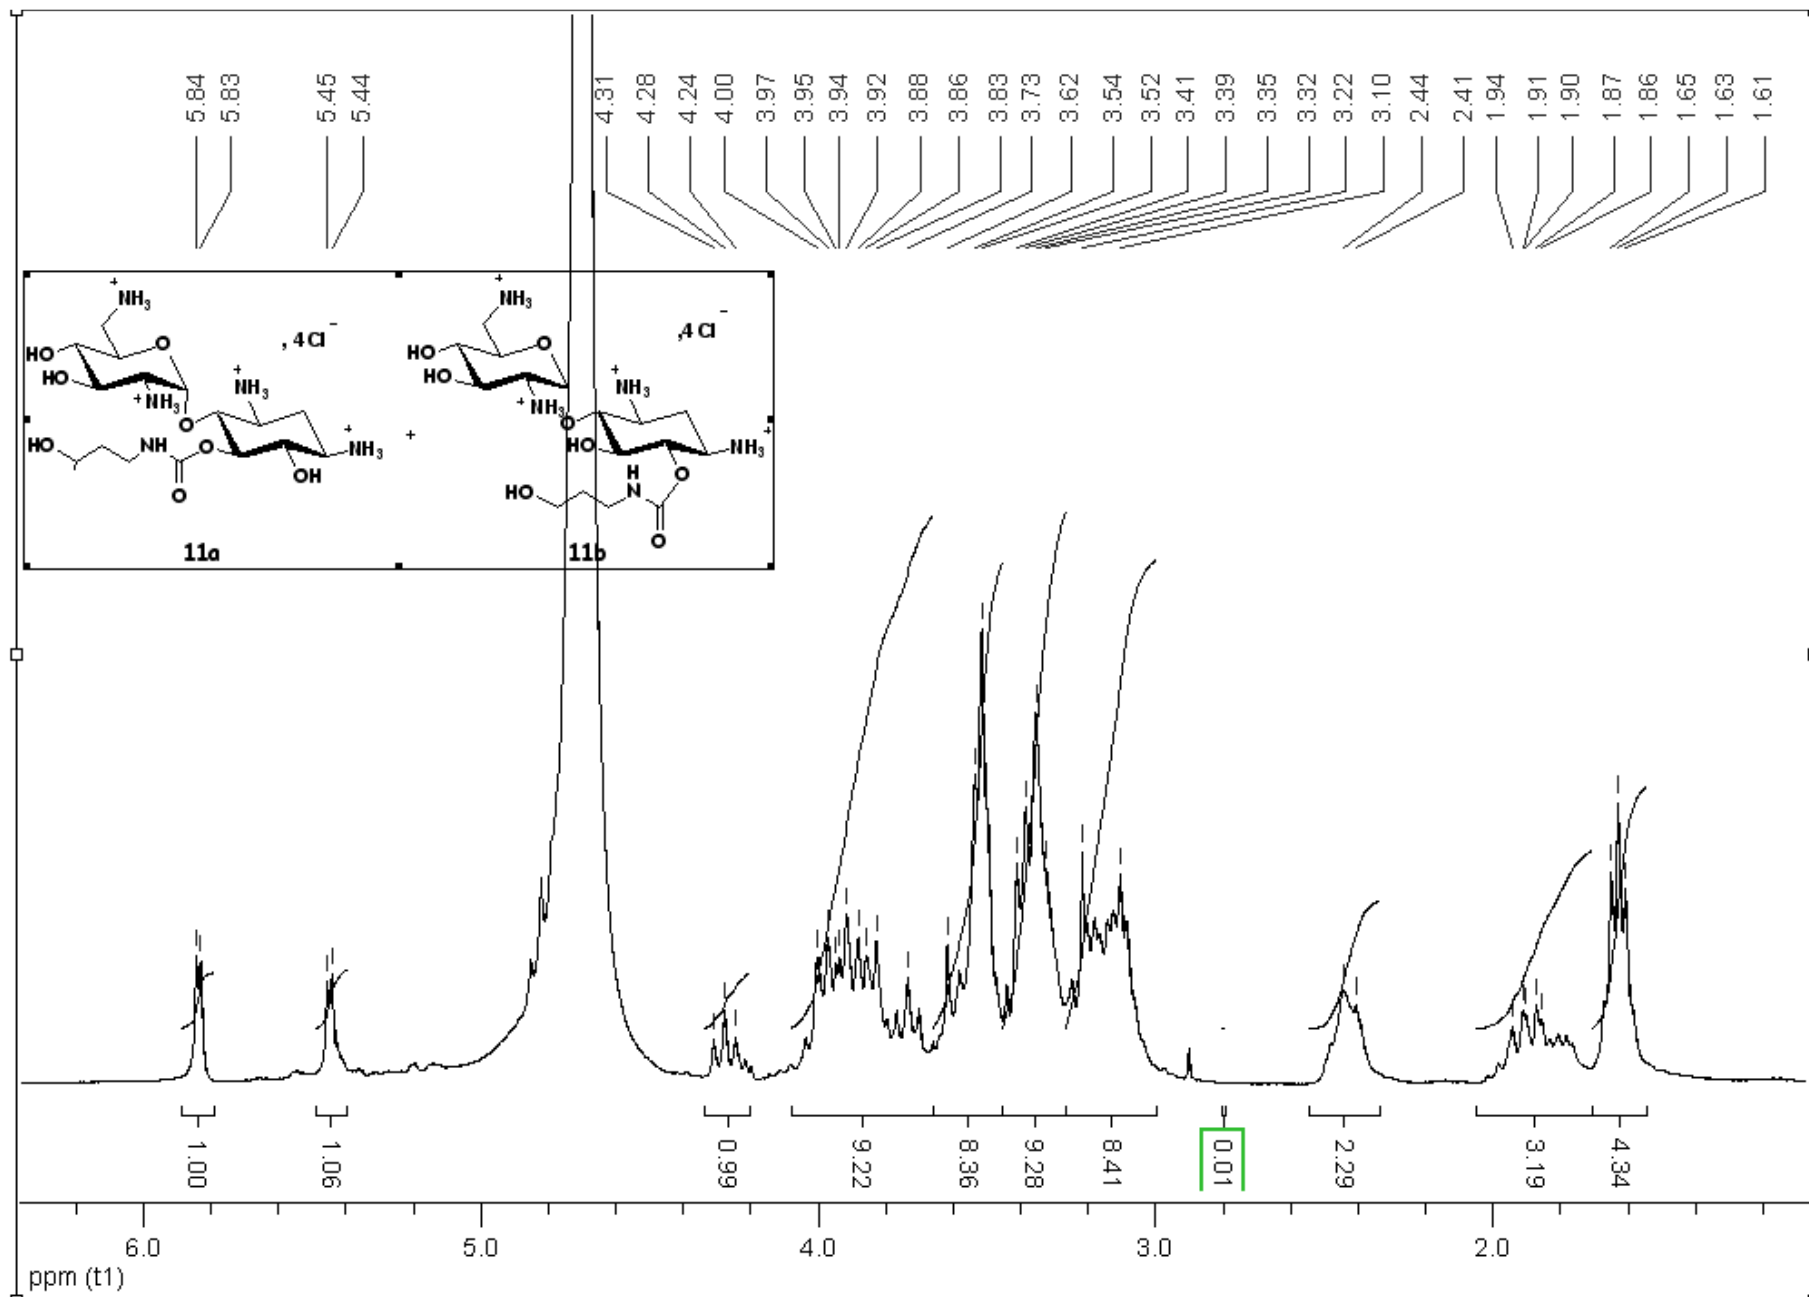

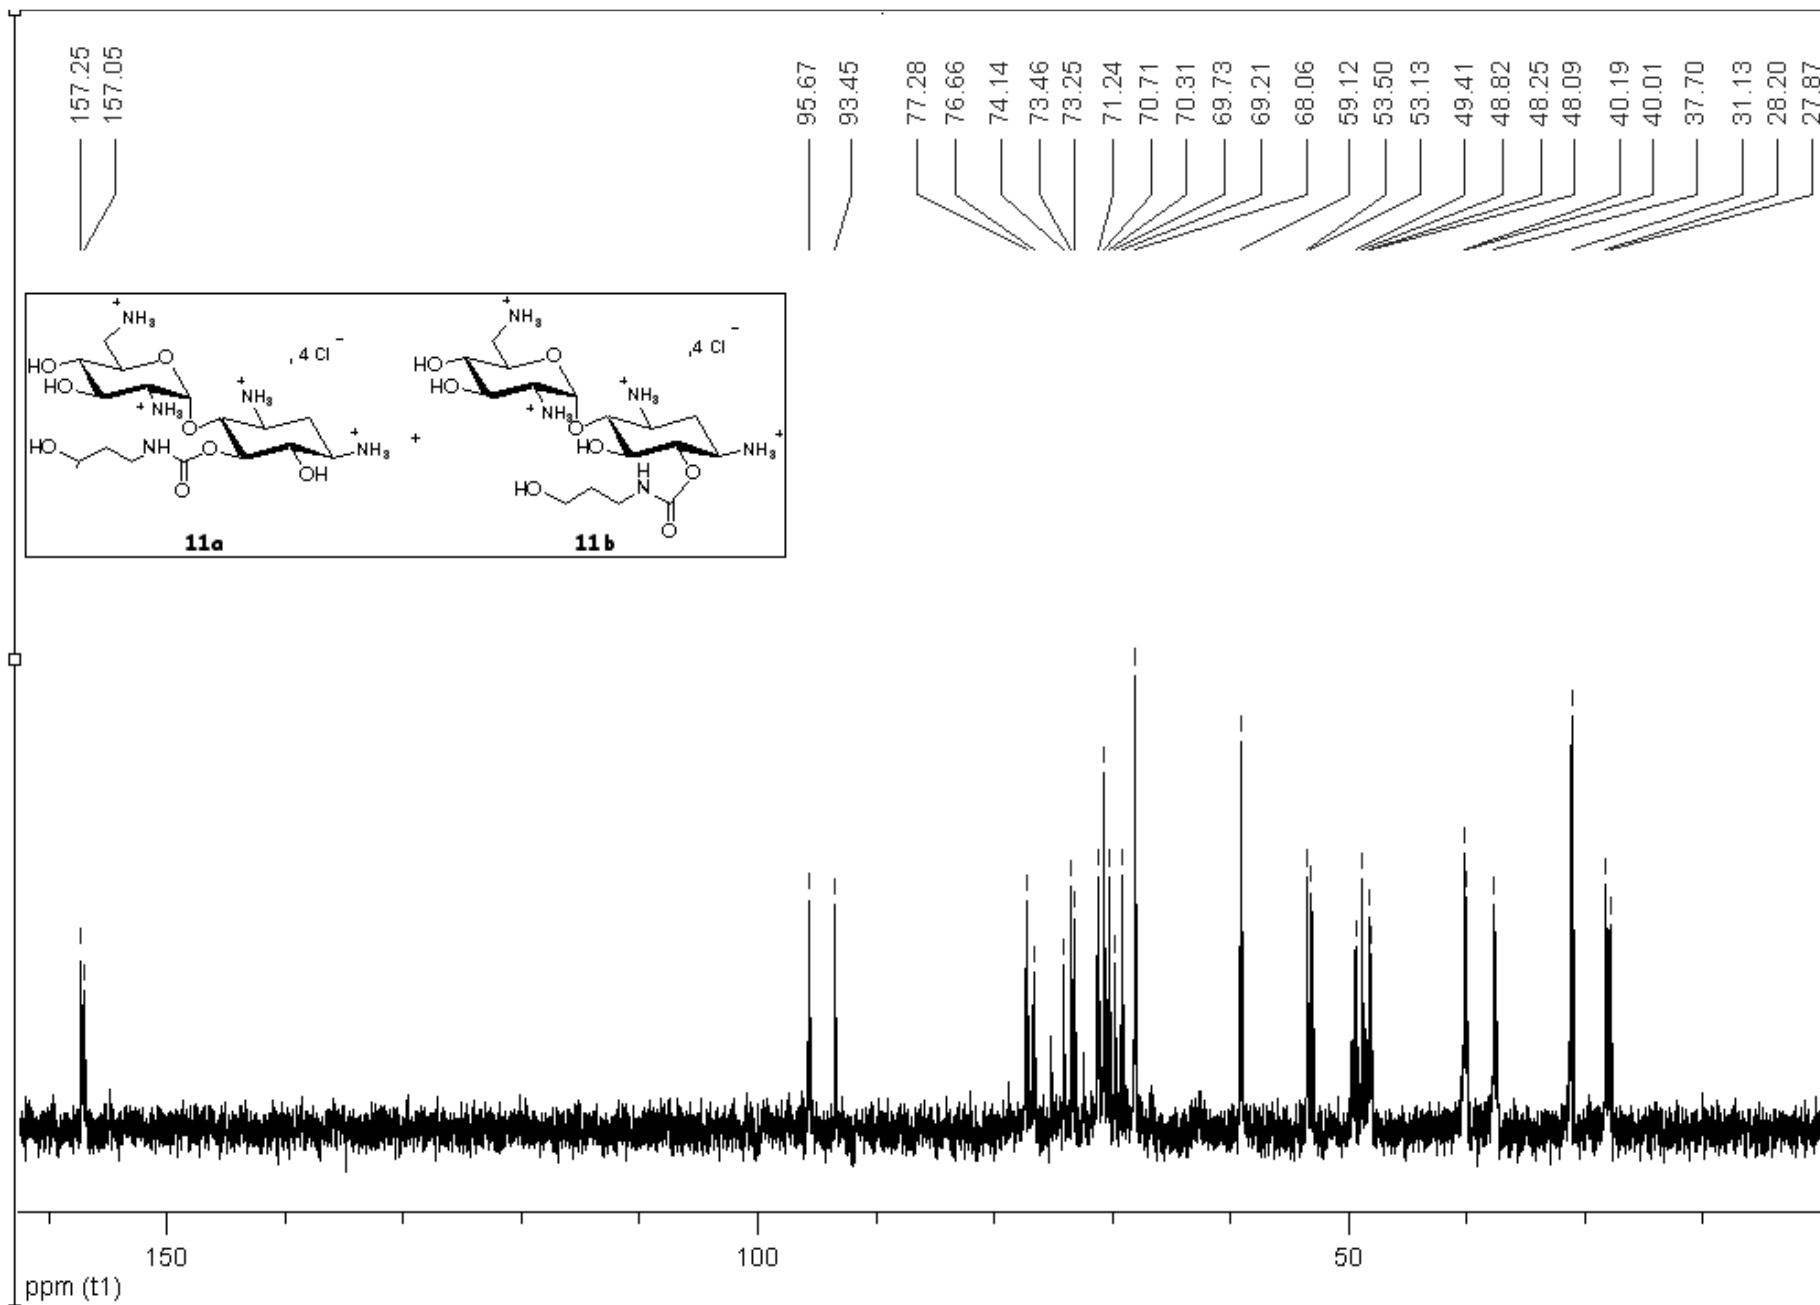



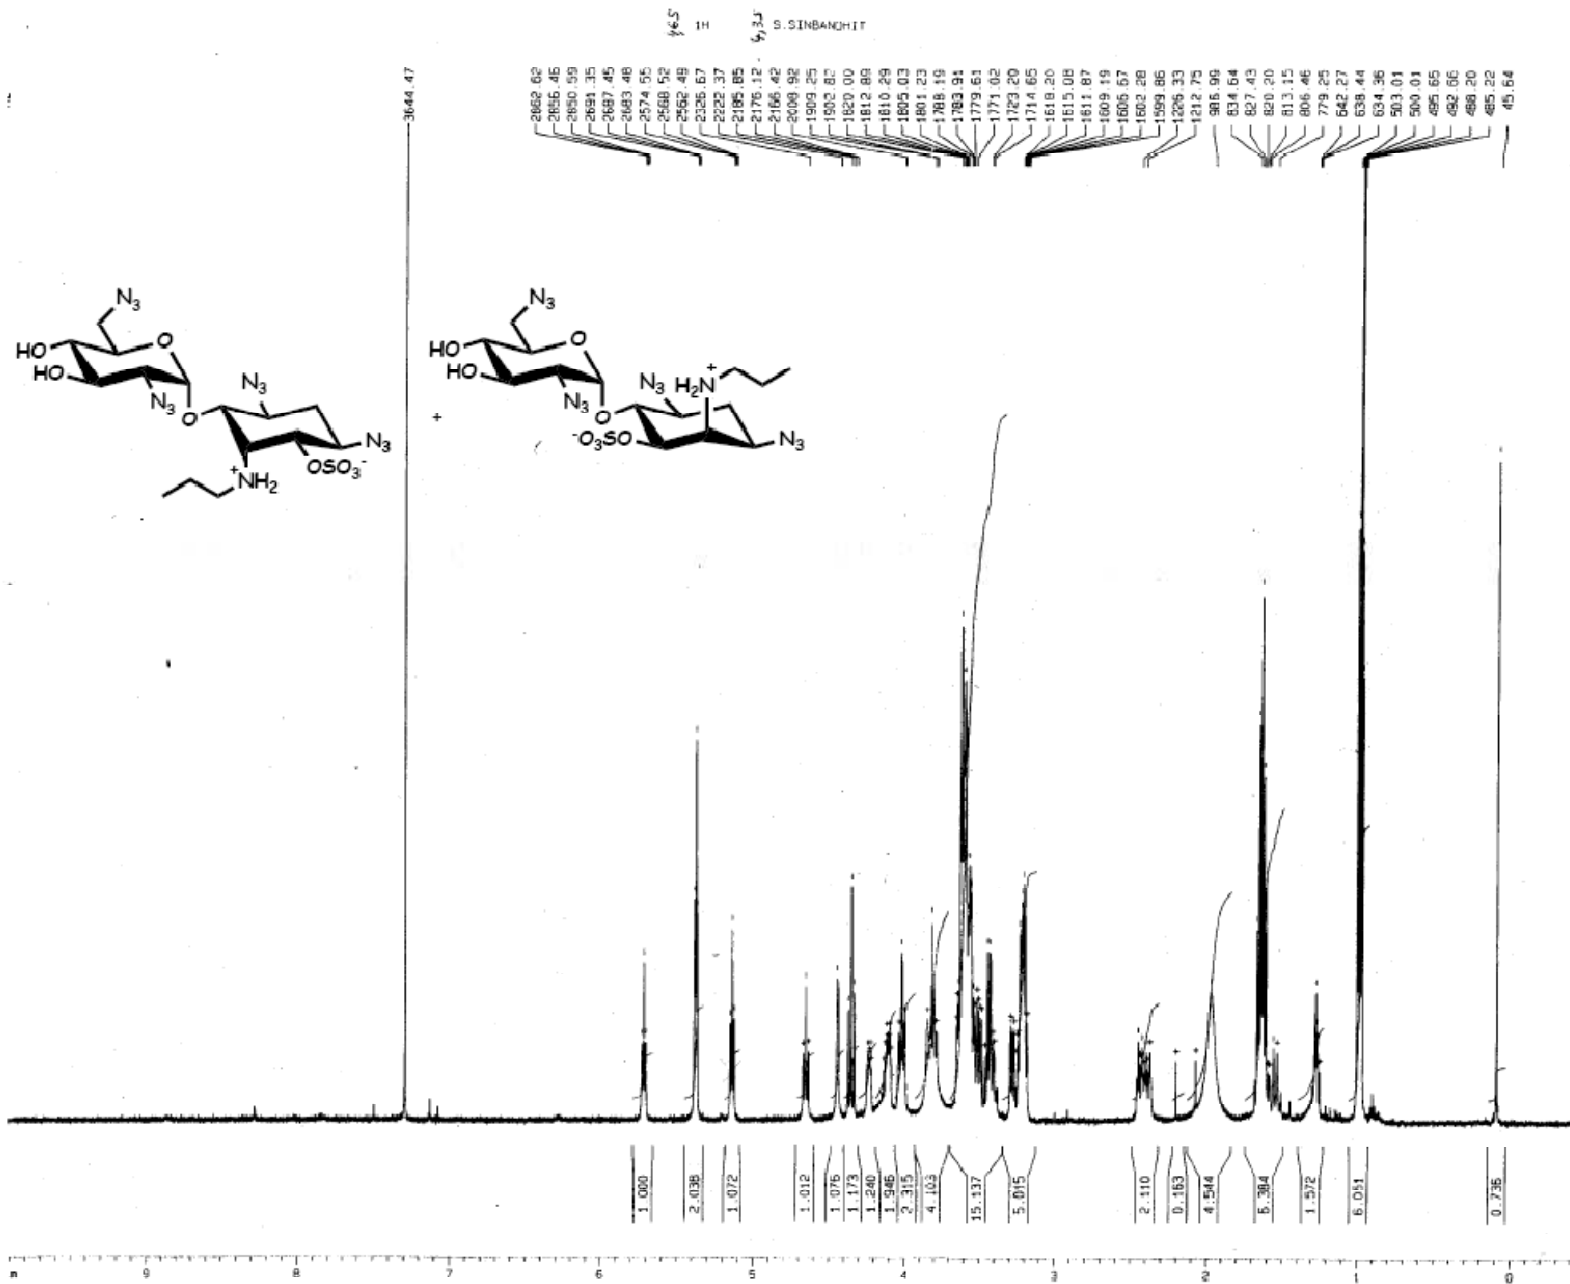

Current Data Parameters  
 NAME: mg2-40c  
 EXNO: 1  
 PROCNO: 1

F2 - Acquisition Parameters  
 Date\_: 20070722  
 Time: 10.35  
 INSTRUM: spect  
 PROBHD: 5 mm Dual 13C/  
 PULPROG: zg30  
 TD: 65536  
 SOLVENT: CDCl3  
 VS: 16  
 OS: 2  
 SSB: 7002.001 Hz  
 FIDRES: 0.106854 Hz  
 AQ: 4.6793910 sec  
 RG: 406.4  
 DM: 71.400 usec  
 DE: 12.00 usec  
 TE: 300.0 K  
 D9: 0.5000000 sec

\*\*\*\*\* CHANNEL f1 \*\*\*\*\*  
 NUC1: 1H  
 P1: 8.65 usec  
 PL1: 0.05 dB  
 SFO1: 500.1330008 MHz

F2 - Processing parameters  
 SI: 32768  
 SF: 500.1330000 MHz  
 WDW: no  
 SSB: 0  
 LB: 0.00 Hz  
 GB: 0  
 PC: 1.00

F2 NMR plot parameters  
 CX: 35.00 cm  
 CY: 60.00 cm  
 FSP: 10.000 ppm  
 F1: 500.130 MHz  
 F2: -250.06 Hz  
 PRNCH: 0.30000 ppm/cm  
 ROCK: 150.03899 Hz/cm

13C DEC T01 5 SINBANDH1

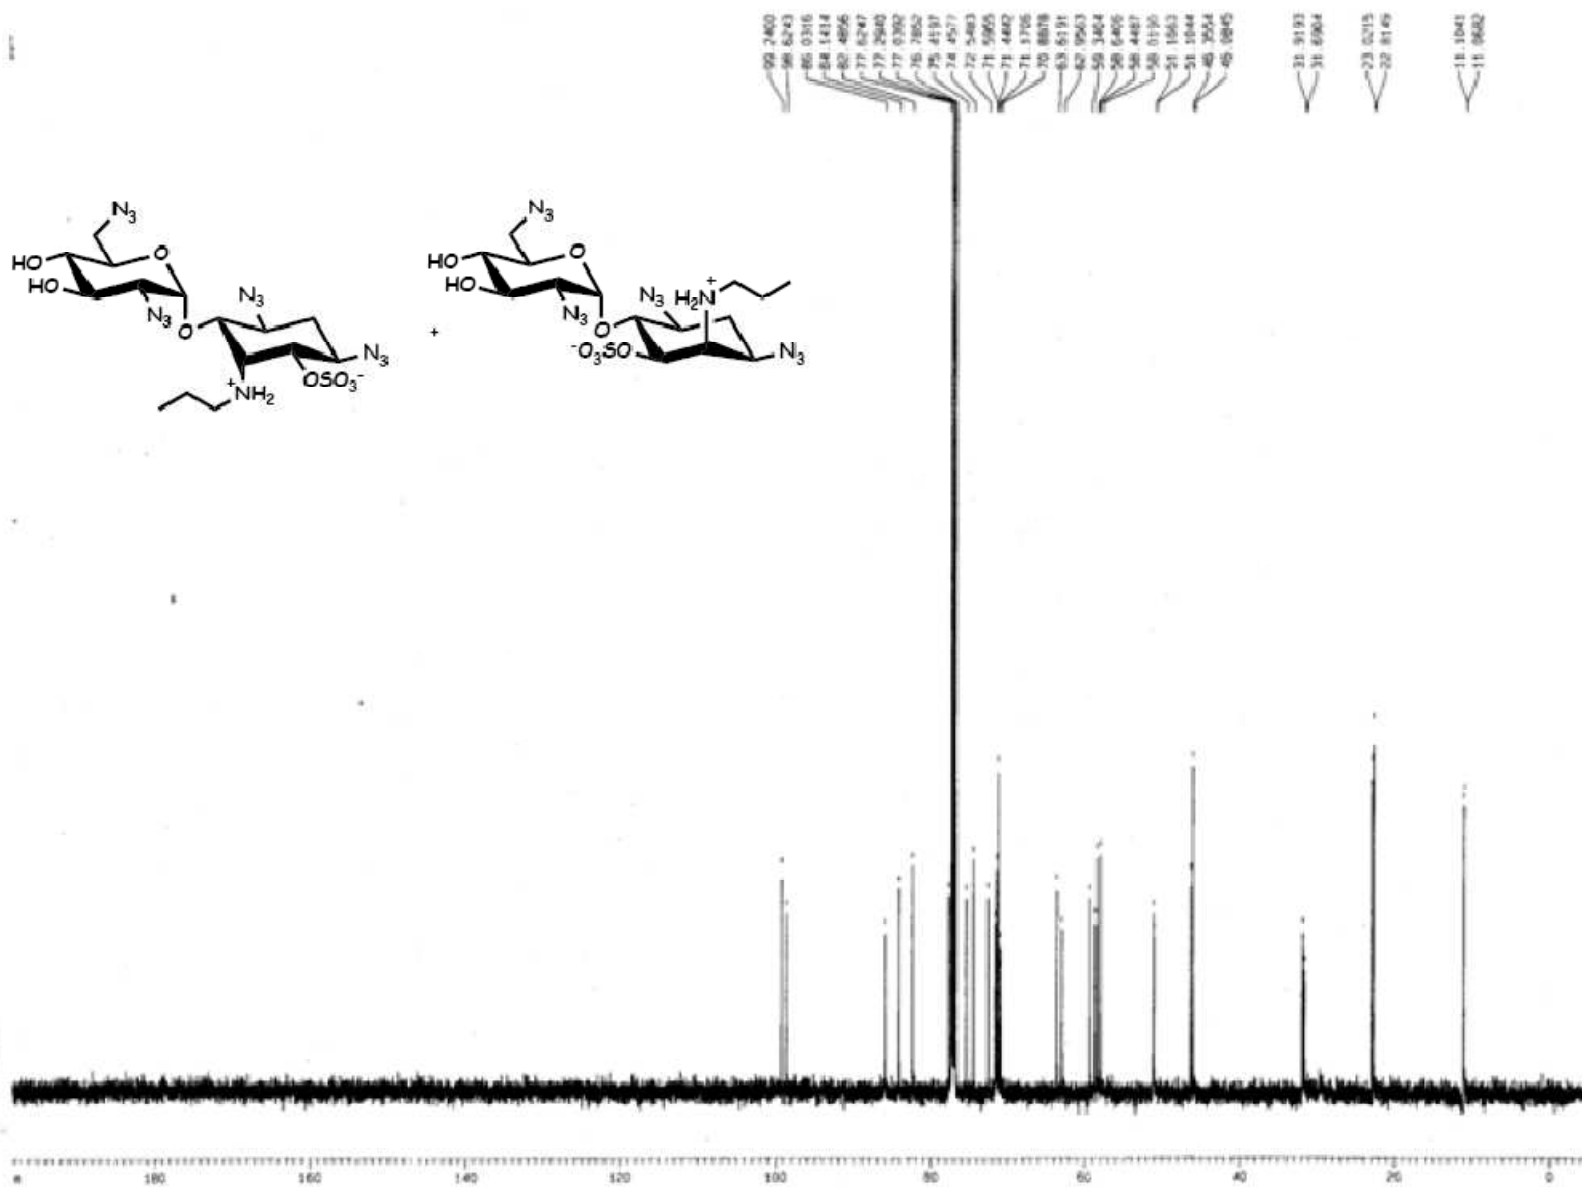

===== DATA PARAMETERS =====  
 NAME: AG2-H0c  
 CONNO: 3  
 PROCD: 1

F2 - Acquisition Parameters  
 Date\_: 20070720  
 Time: 14.56  
 INSTRM: spect  
 PROBHD: 5 mm QNP 13C/  
 PULPROG: zgpg30  
 TD: 65536  
 SOLVENT: CDCl3  
 NS: 2548  
 DS: 2  
 SWH: 30446.540 Hz  
 FIDRES: 0.478028 Hz  
 AQ: 1.0420883 sec  
 RG: 23170.5  
 DW: 15.960 usec  
 DE: 29.00 usec  
 TE: 300.0 K  
 D1: 2.00000000 sec  
 d11: 0.00000000 sec  
 d12: 0.00000000 sec

===== CHANNEL F1 =====  
 NUC1: 13C  
 P1: 24.50 usec  
 PL1: -2.00 dB  
 SFO1: 100.628160 MHz

===== CHANNEL F2 =====  
 CPDPRG2: waltz16  
 NUC2: 1H  
 PCPD2: 100.00 usec  
 PL2: 0.00 dB  
 PL12: 22.00 dB  
 PL13: 20.00 dB  
 SFO2: 500.137800 MHz

F2 - Processing parameters  
 SI: 32768  
 SF: 100.628160 MHz  
 WDW: EM  
 SSB: 0  
 GB: 1.00 Hz  
 SC: 0  
 PC: 1.00

===== 13C NMR plot parameters =====  
 CH: 35.00 um  
 CR: 8.00 um  
 FIDP: 200.000 um  
 FI: 25151.56 Hz  
 FIDP: -5.000 um  
 F2: -628.78 Hz  
 RMWD: 5.85714 um/s  
 SCA: 736.58136 Hz/cm

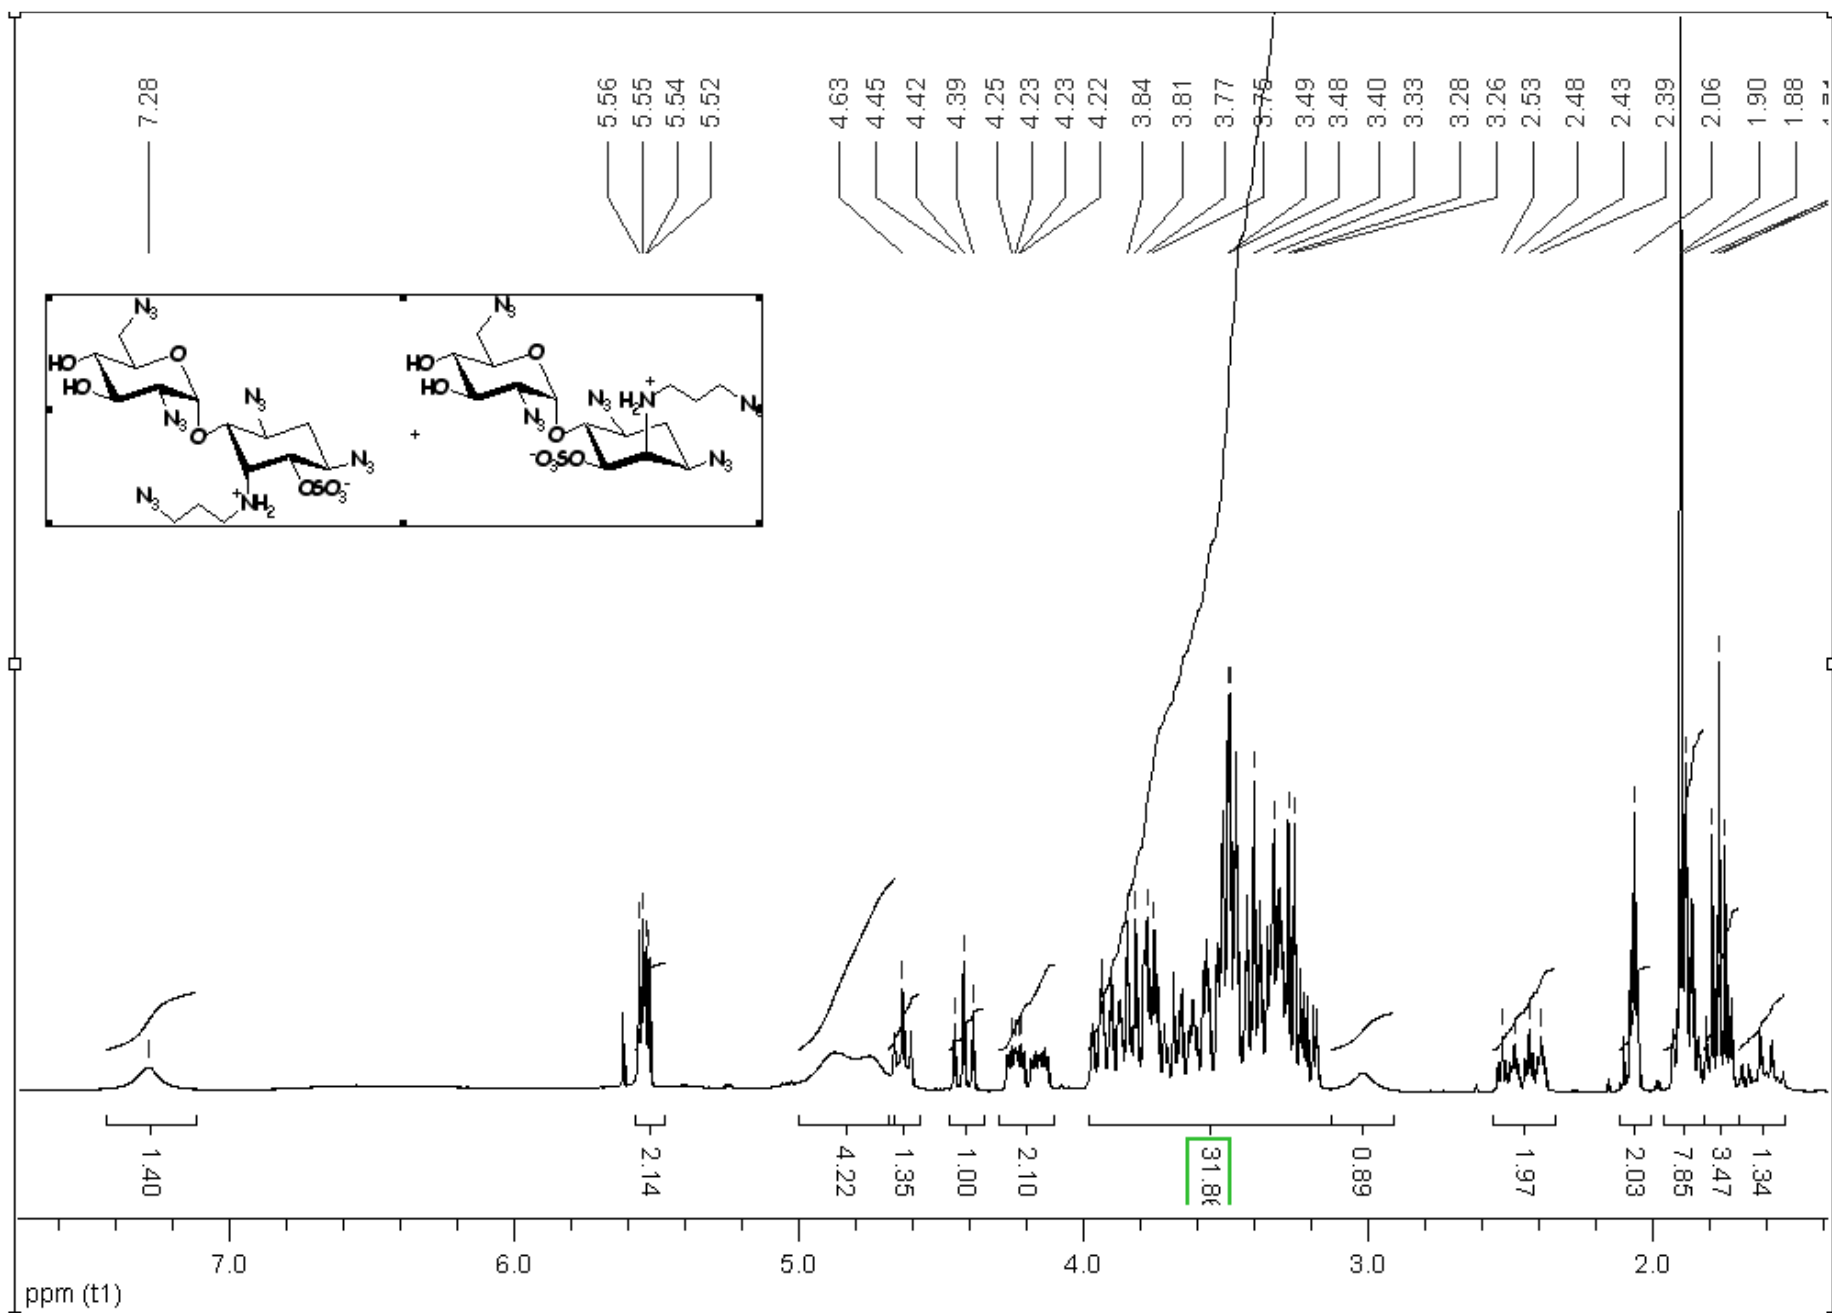

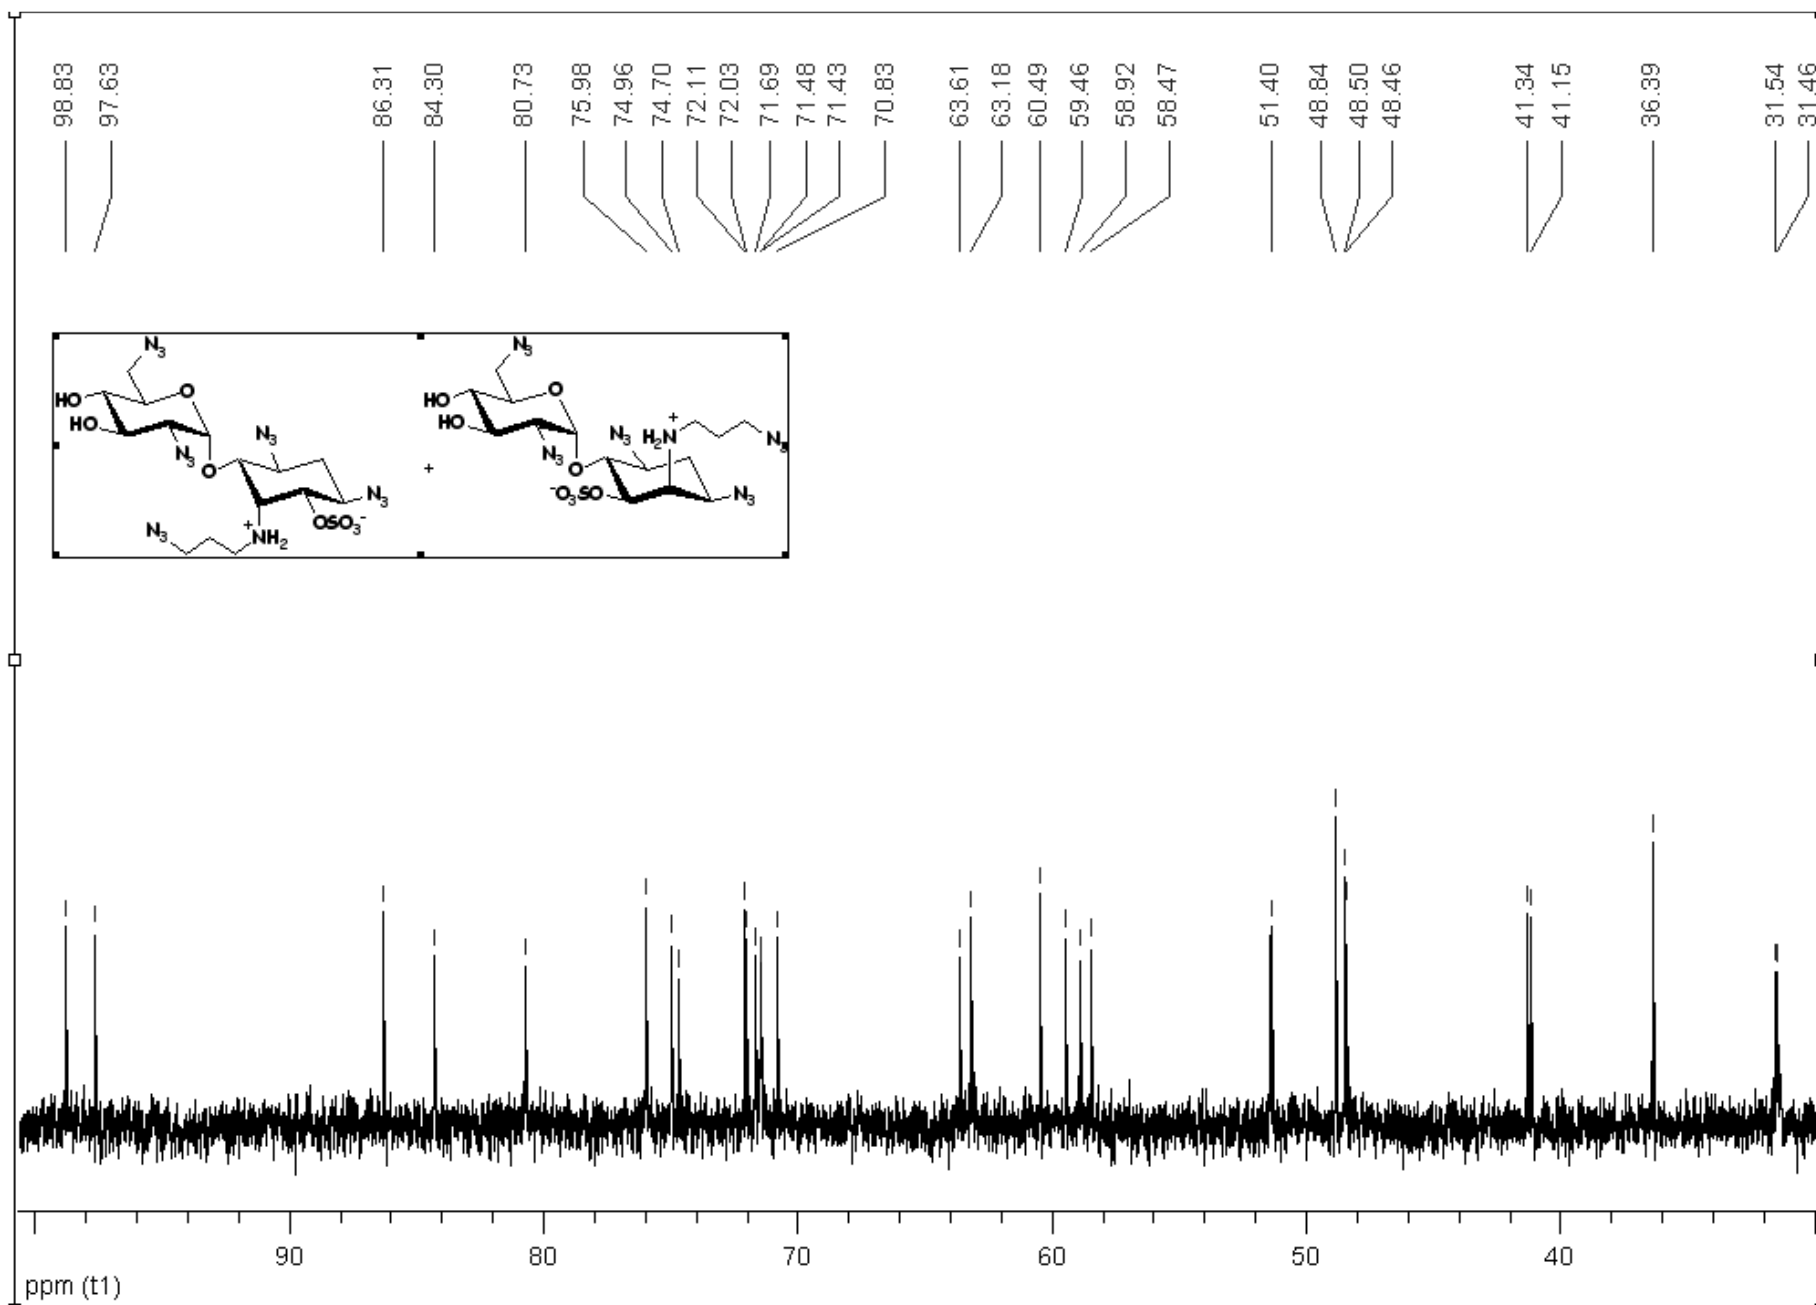

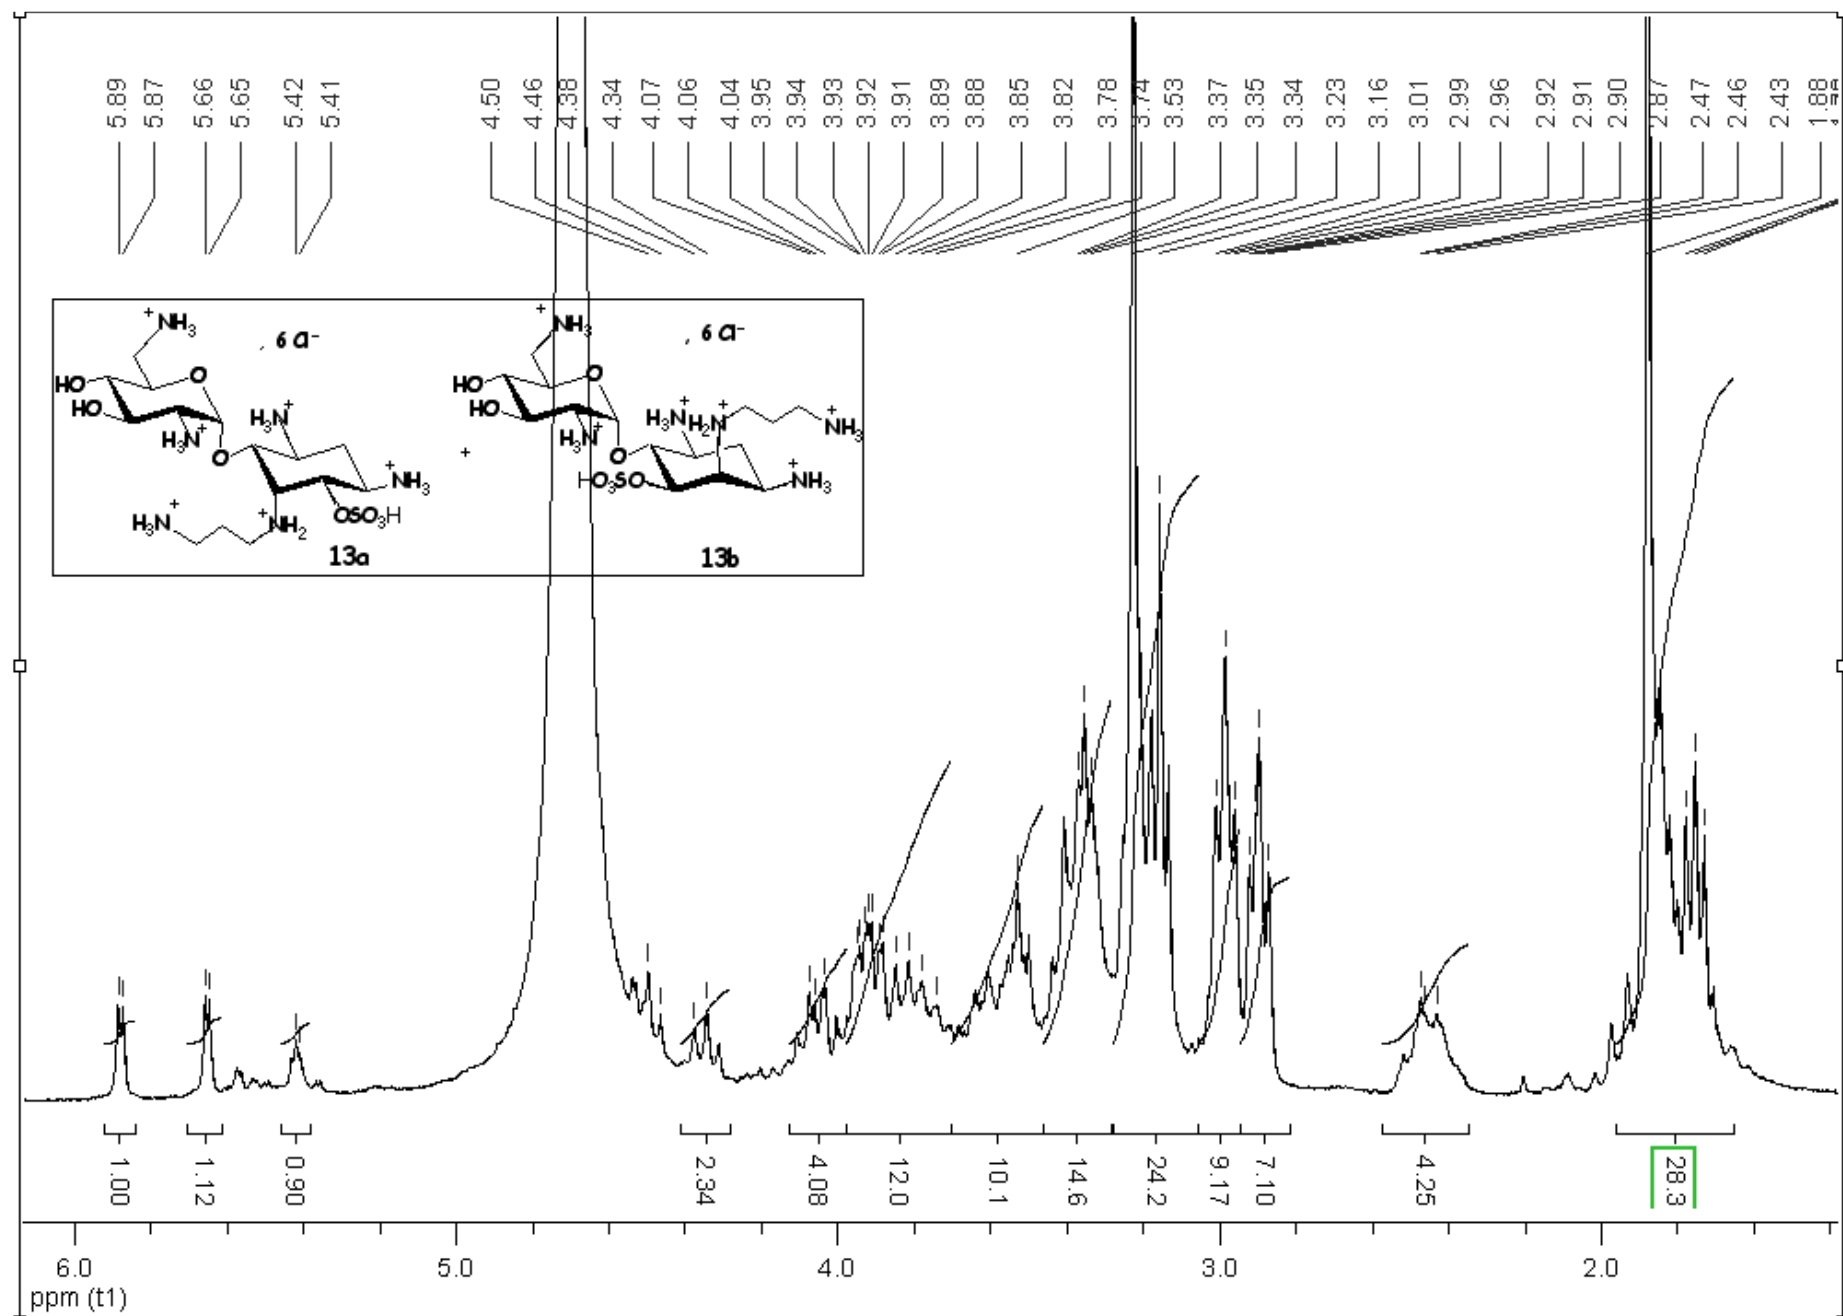

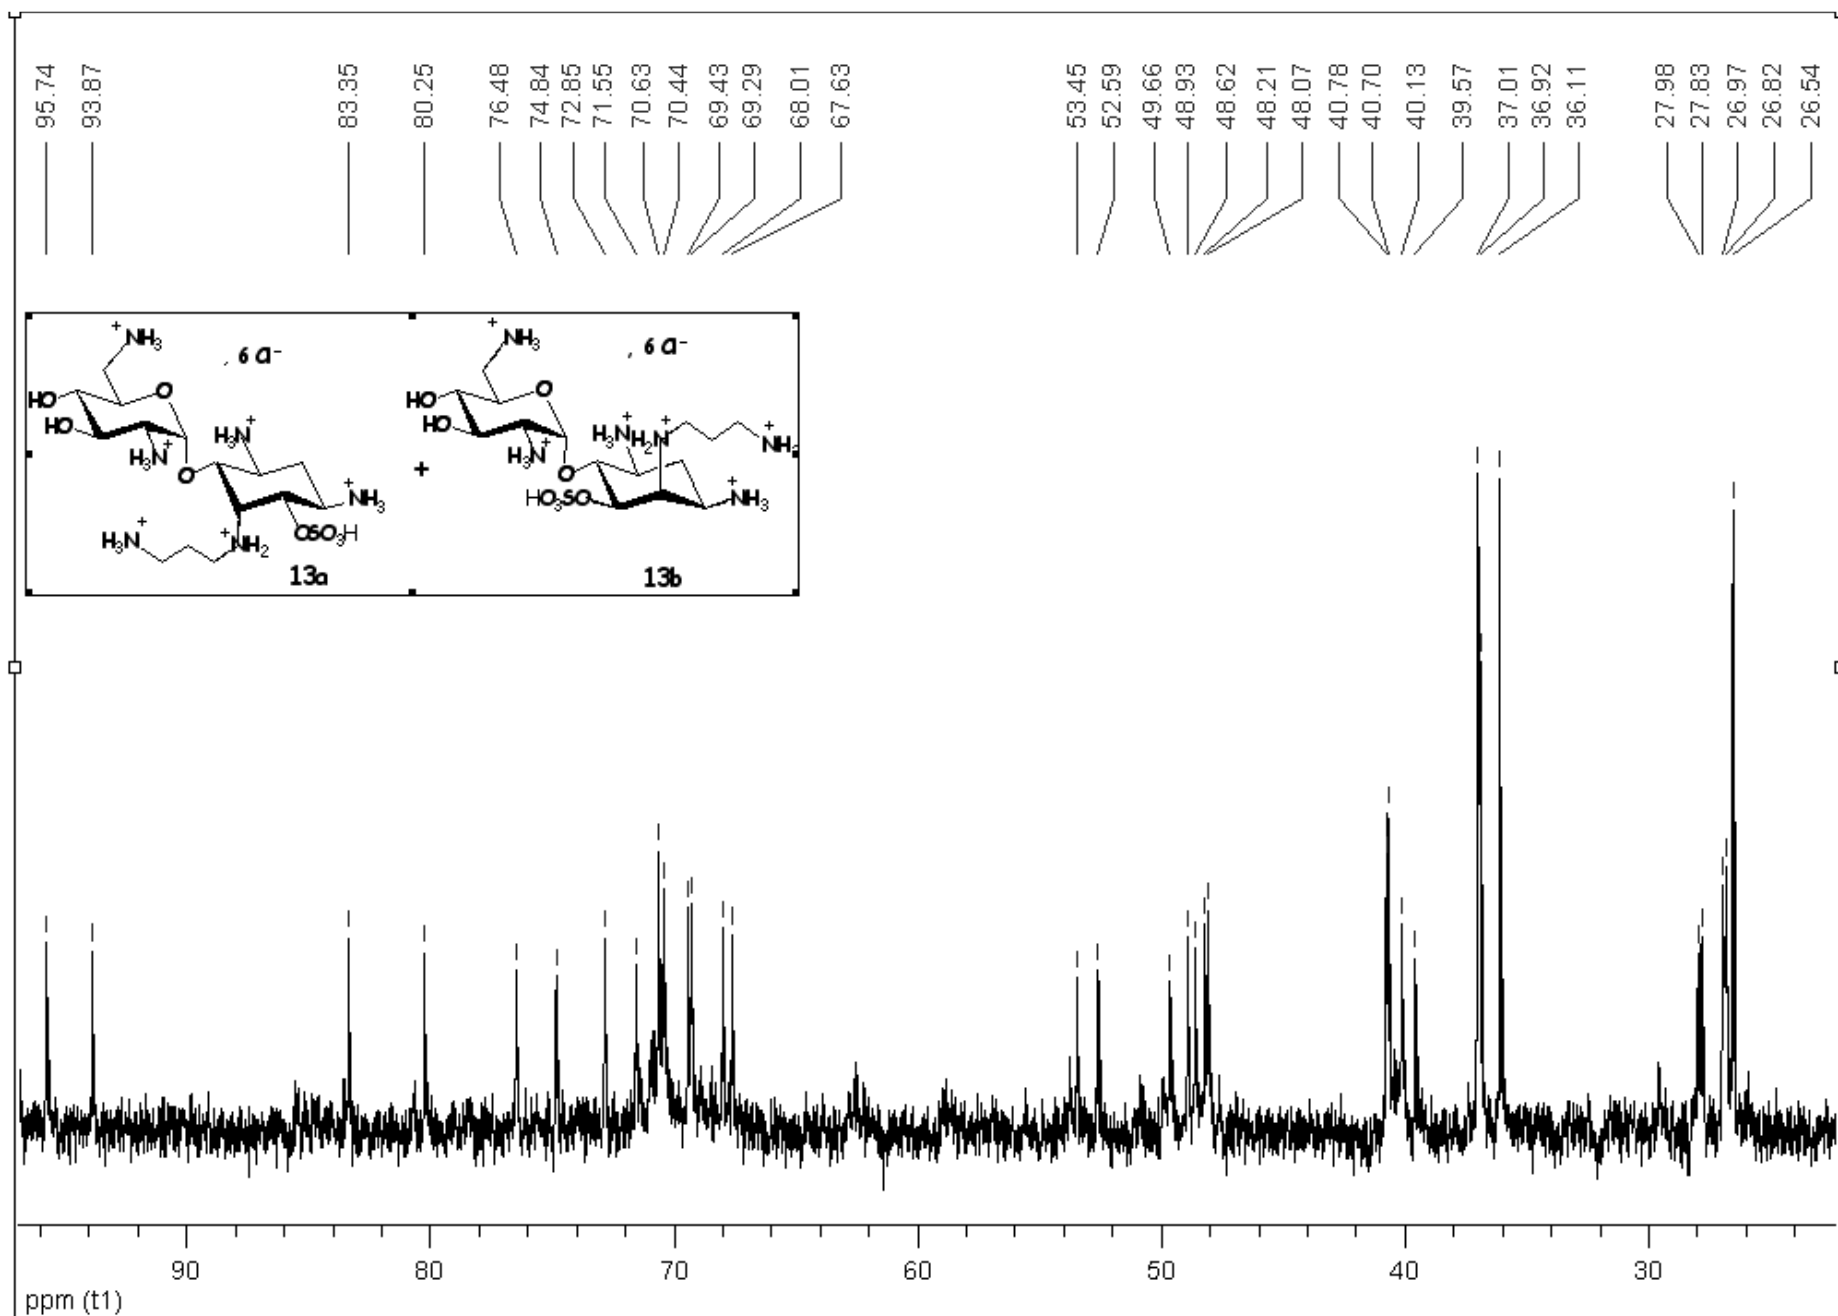

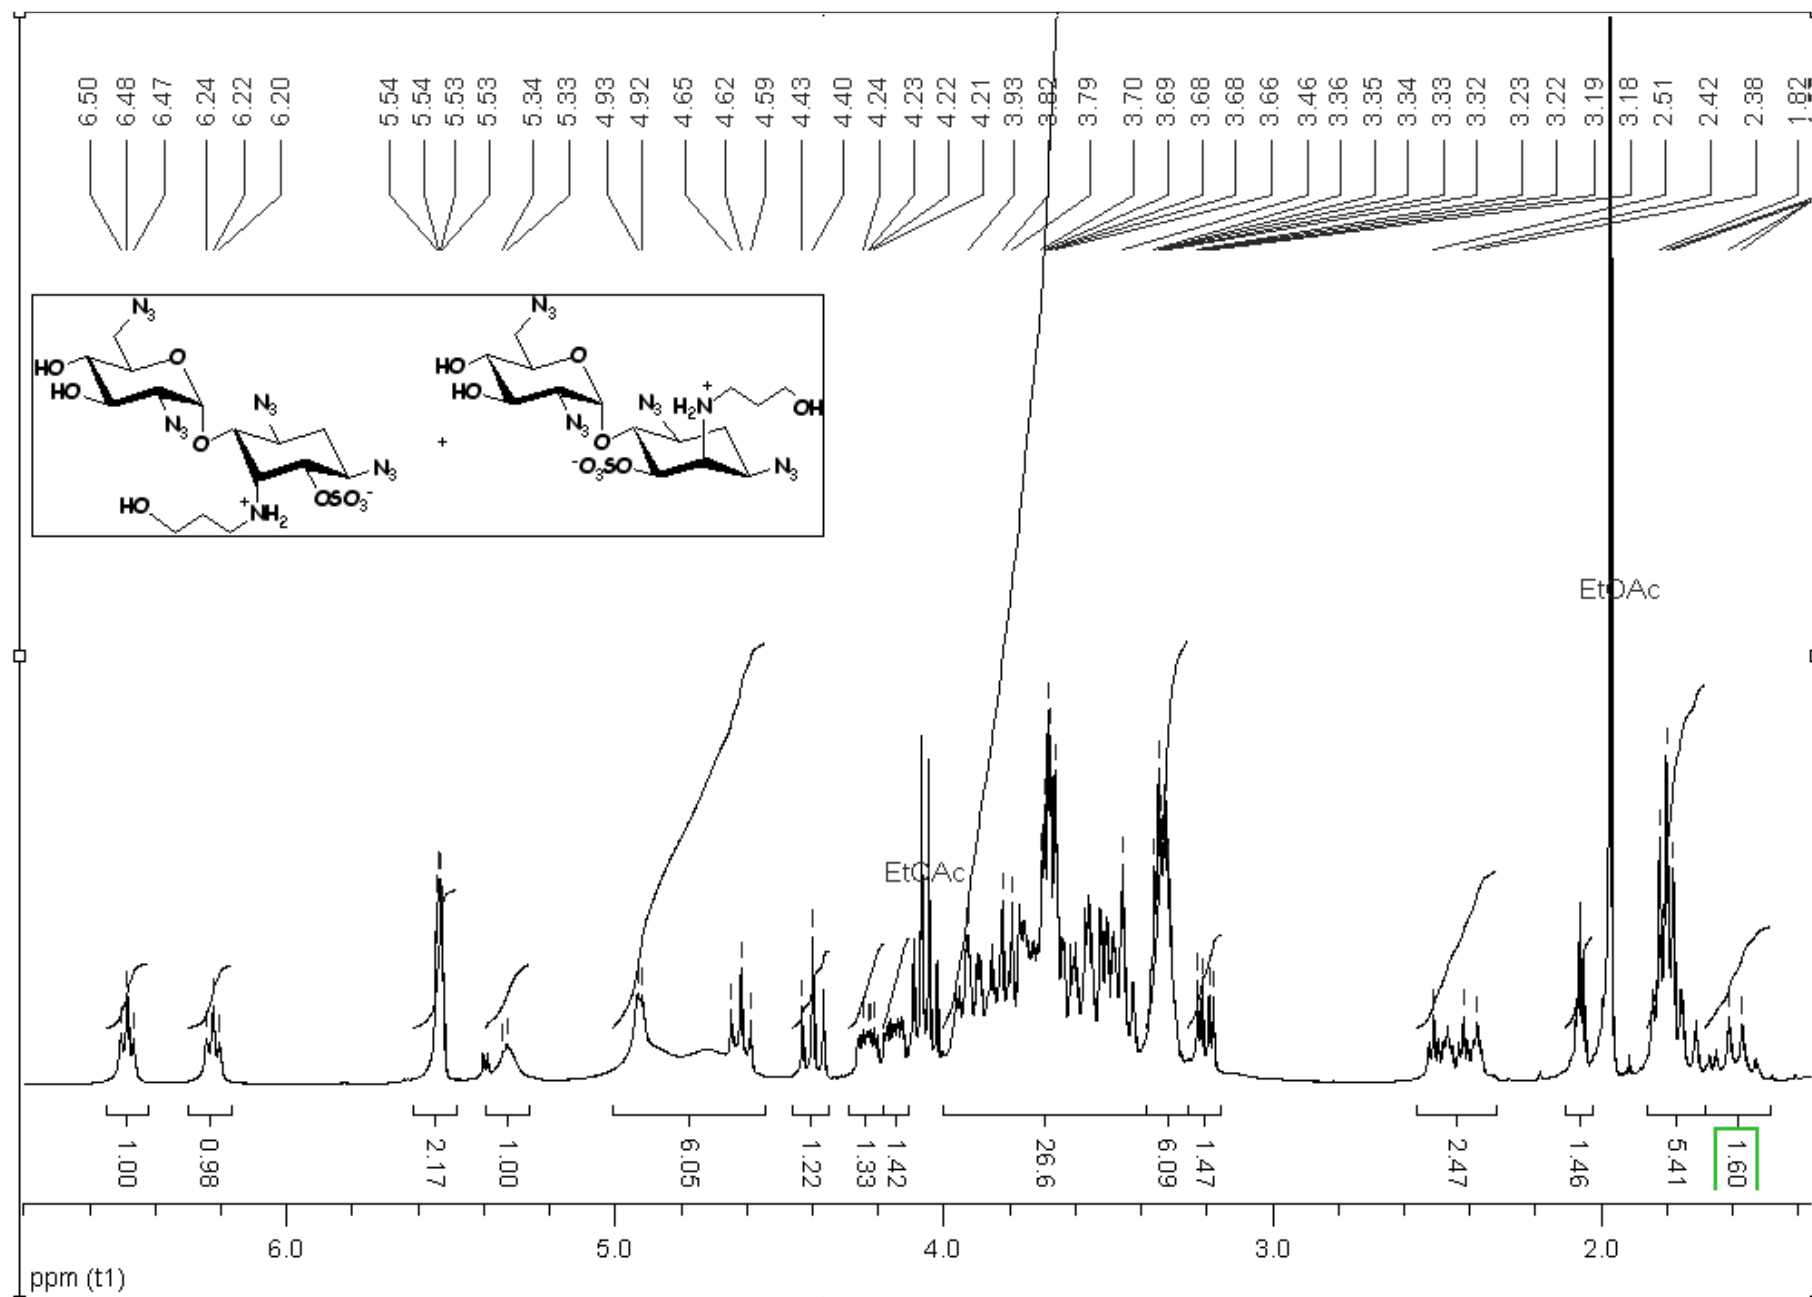

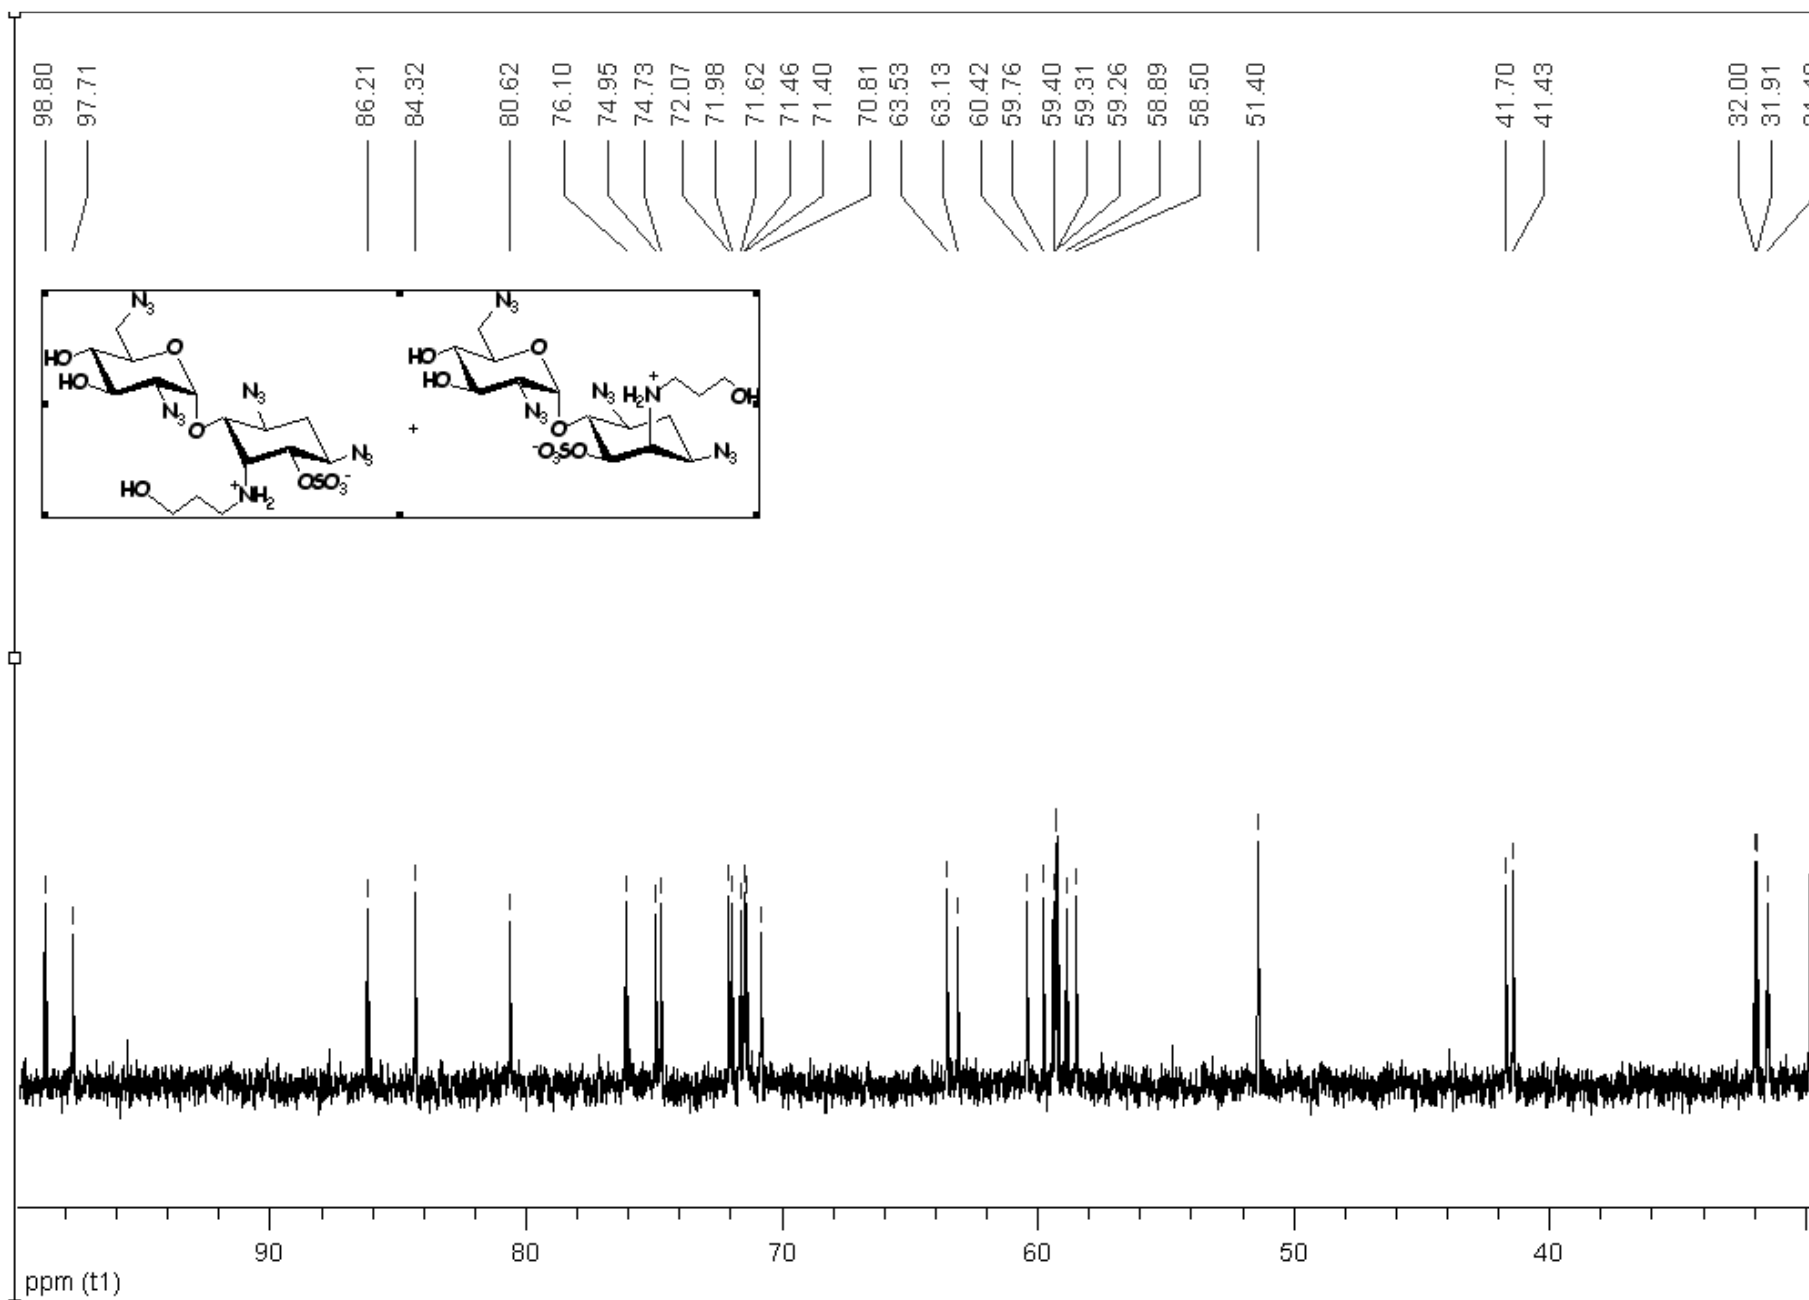



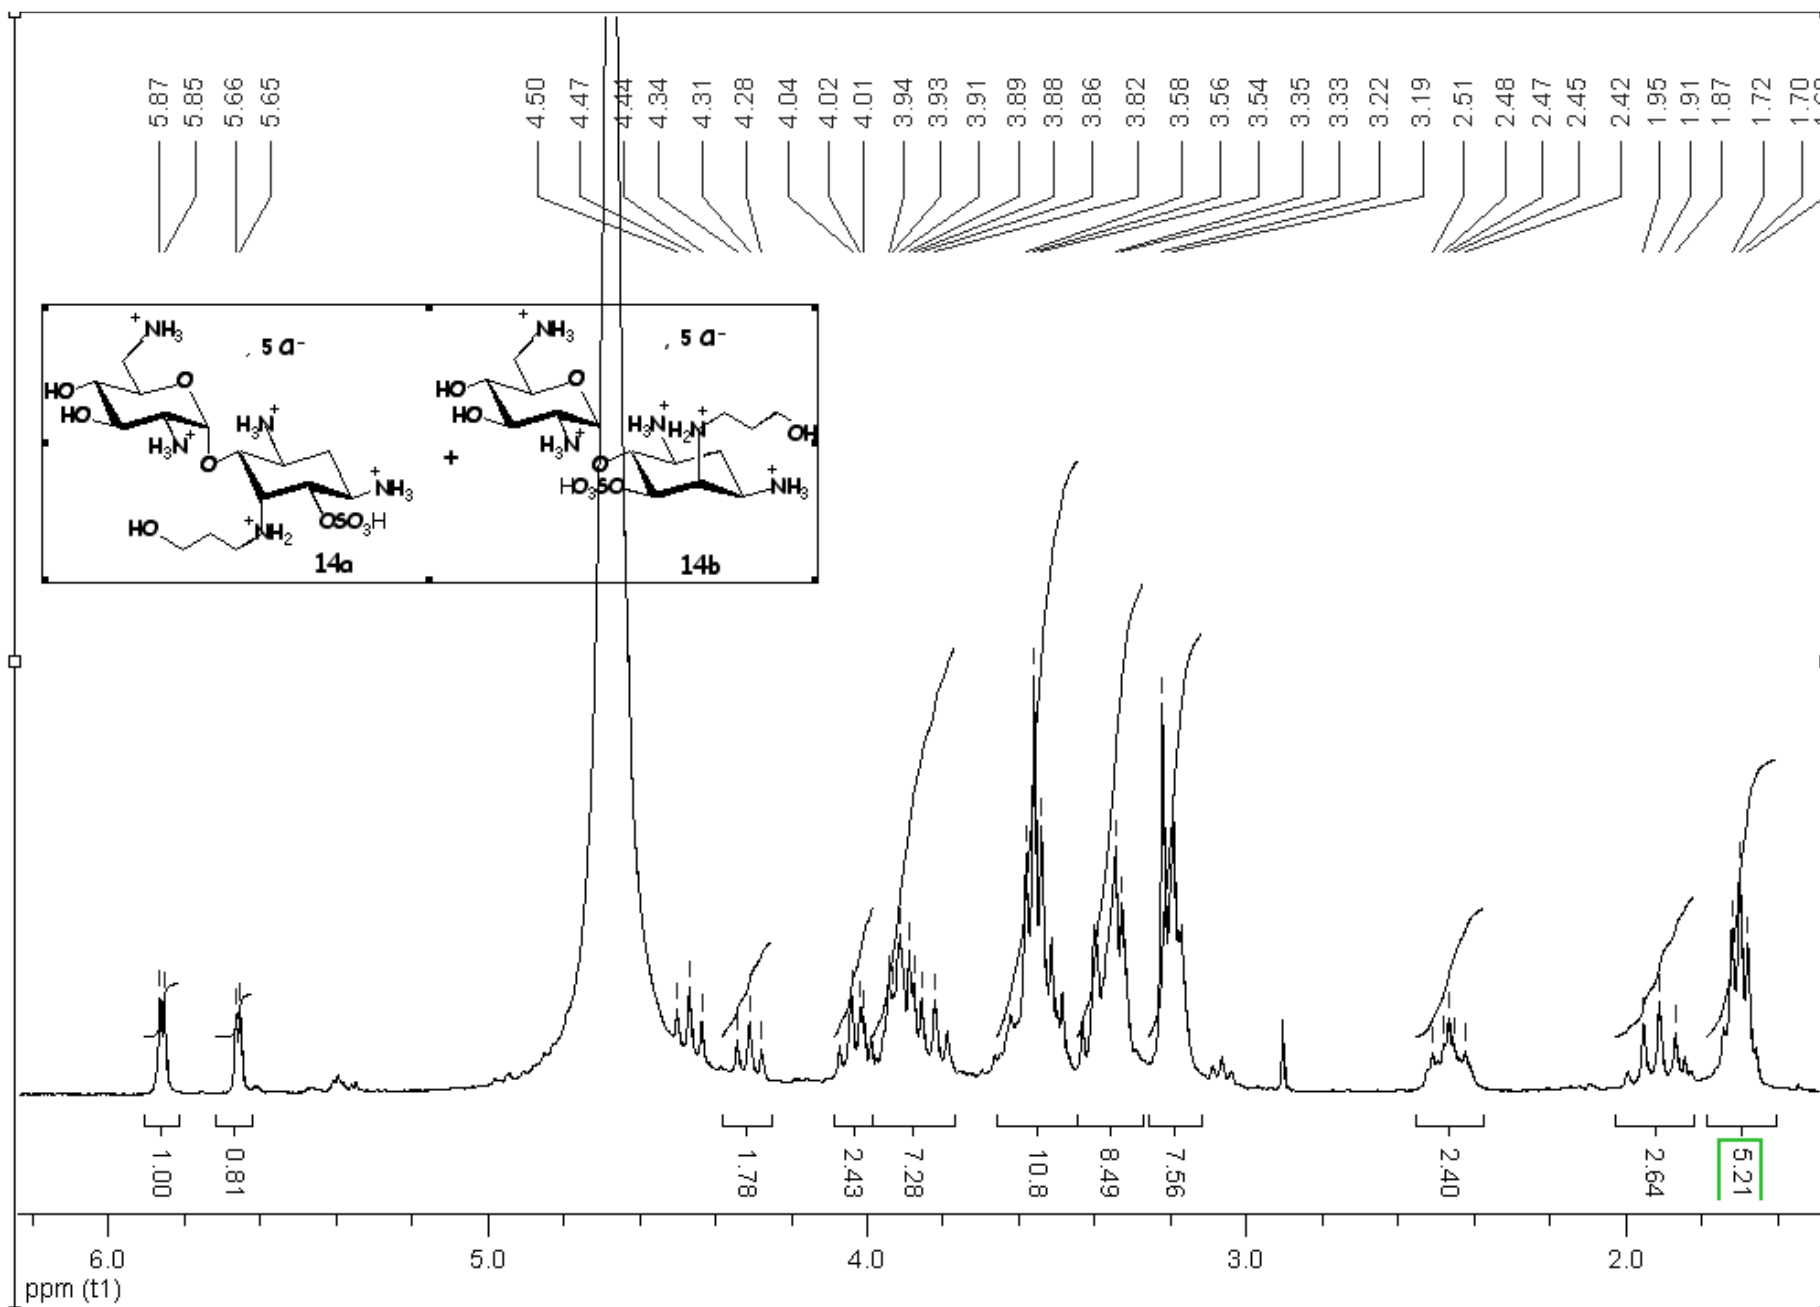

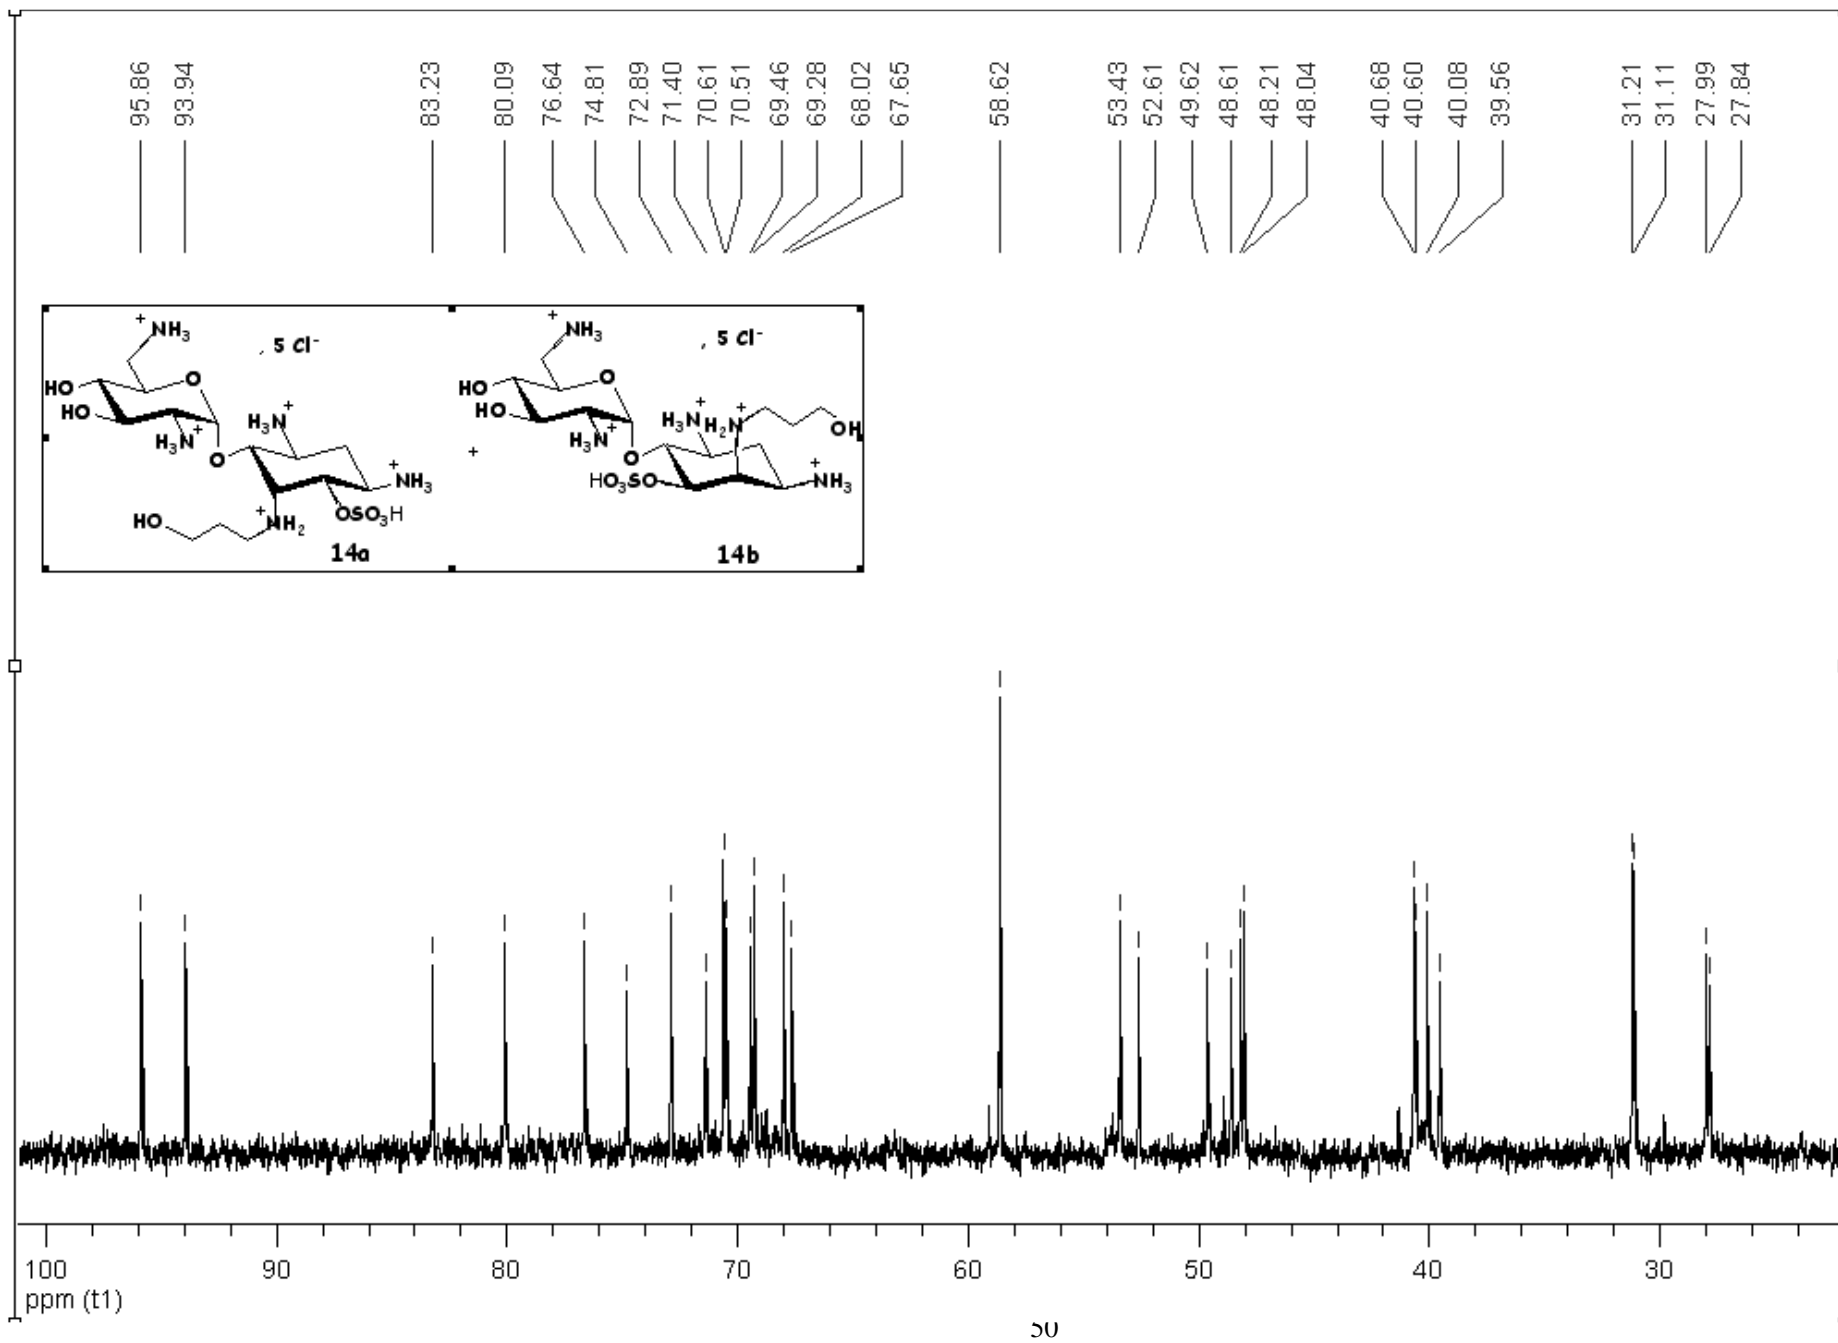

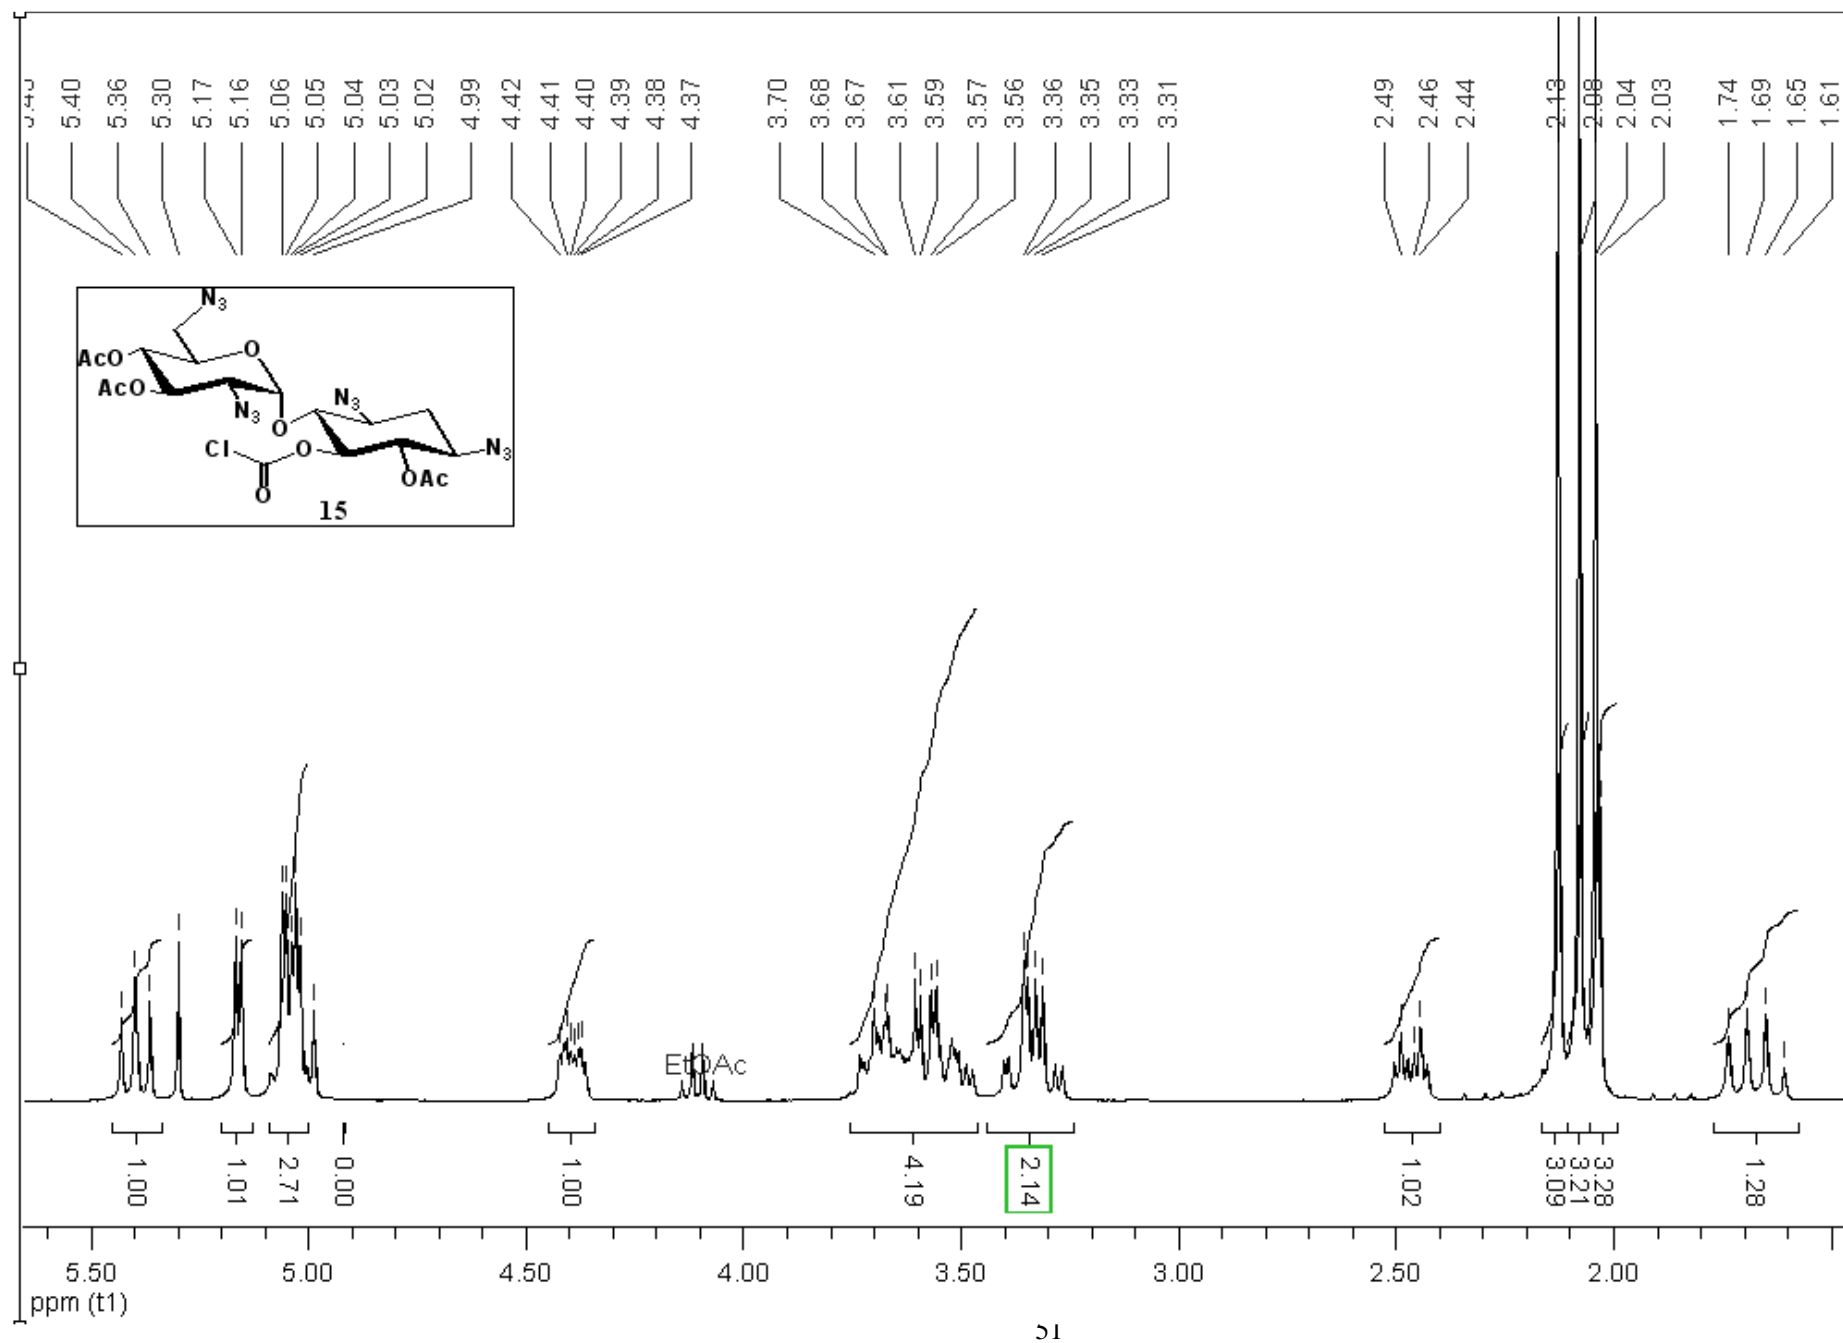

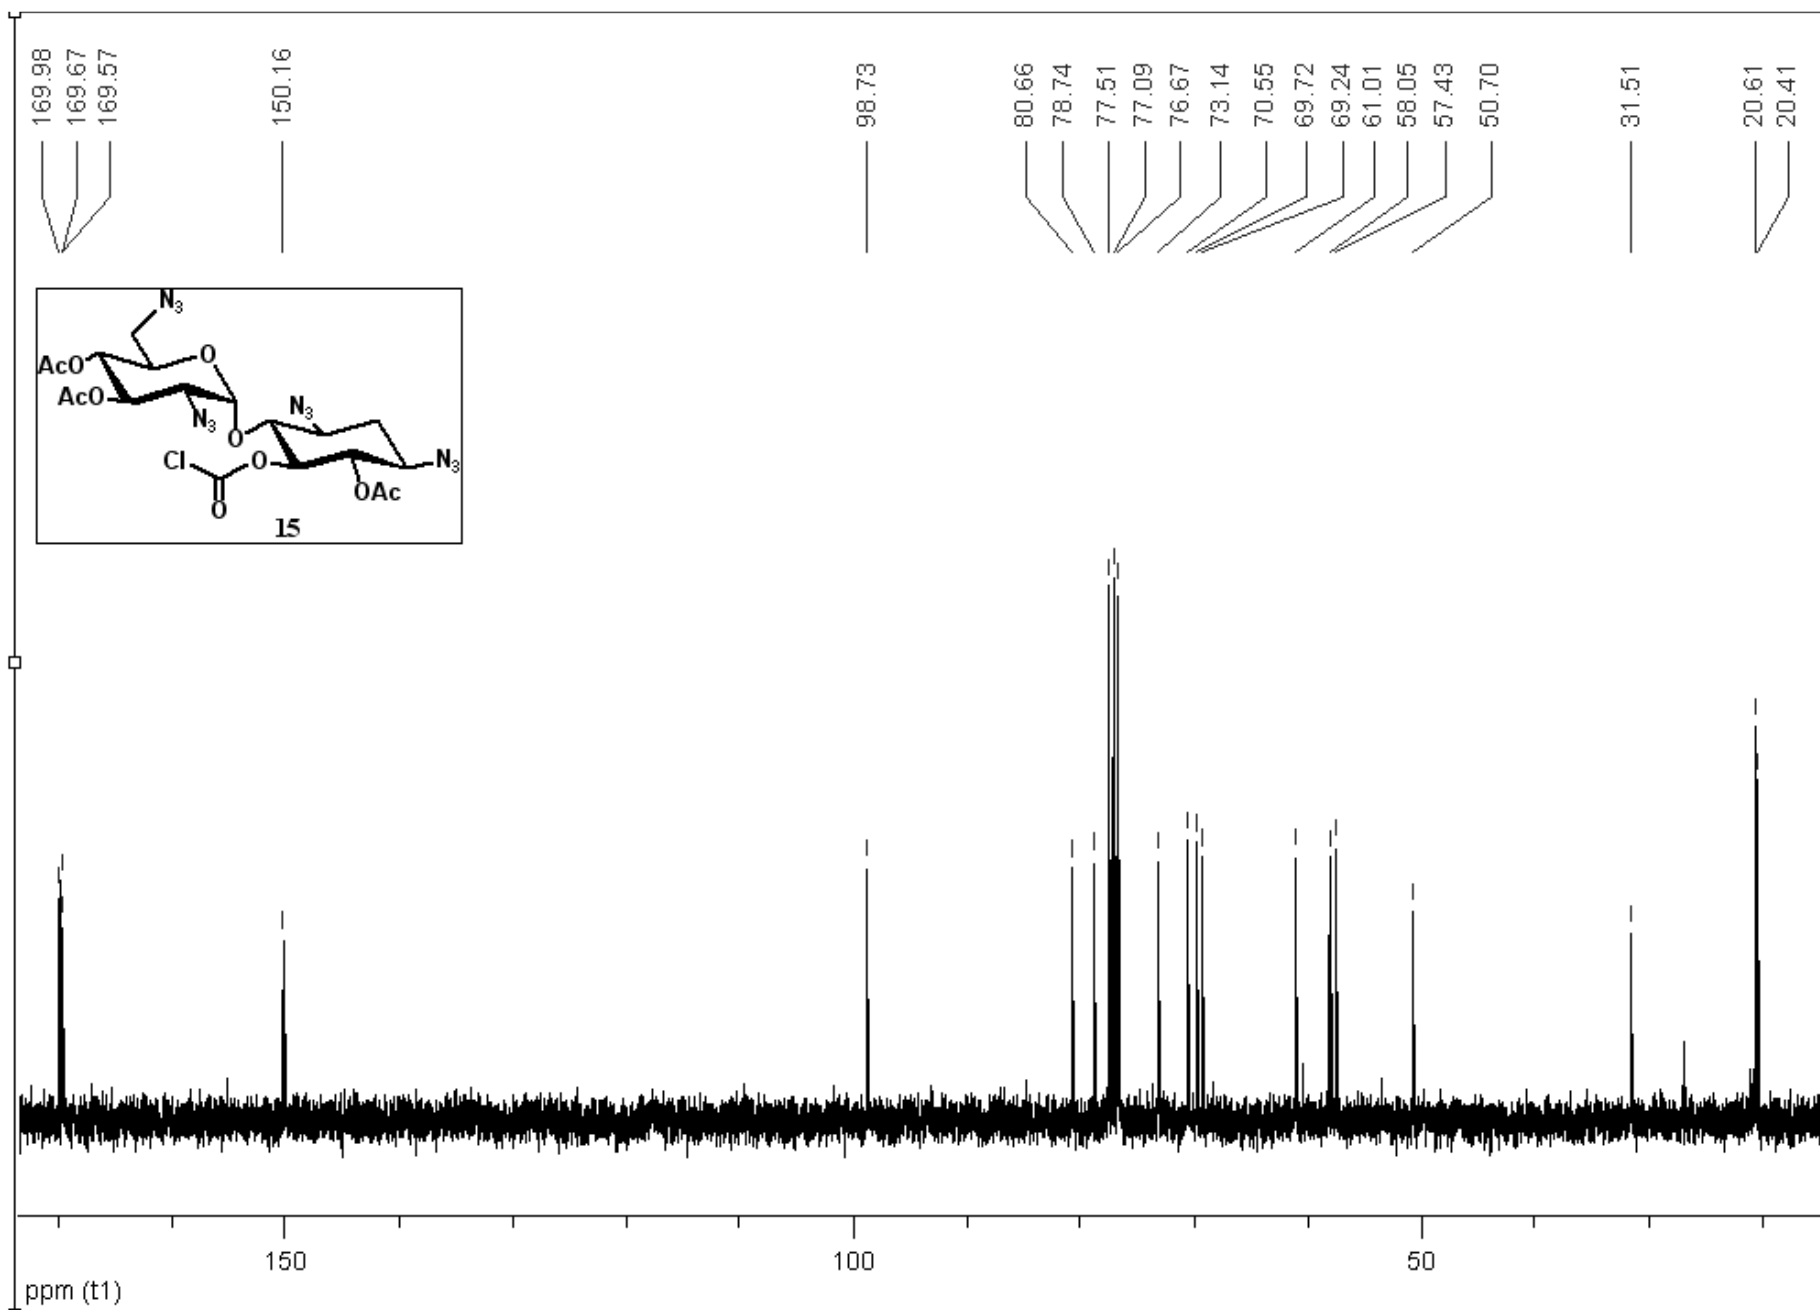

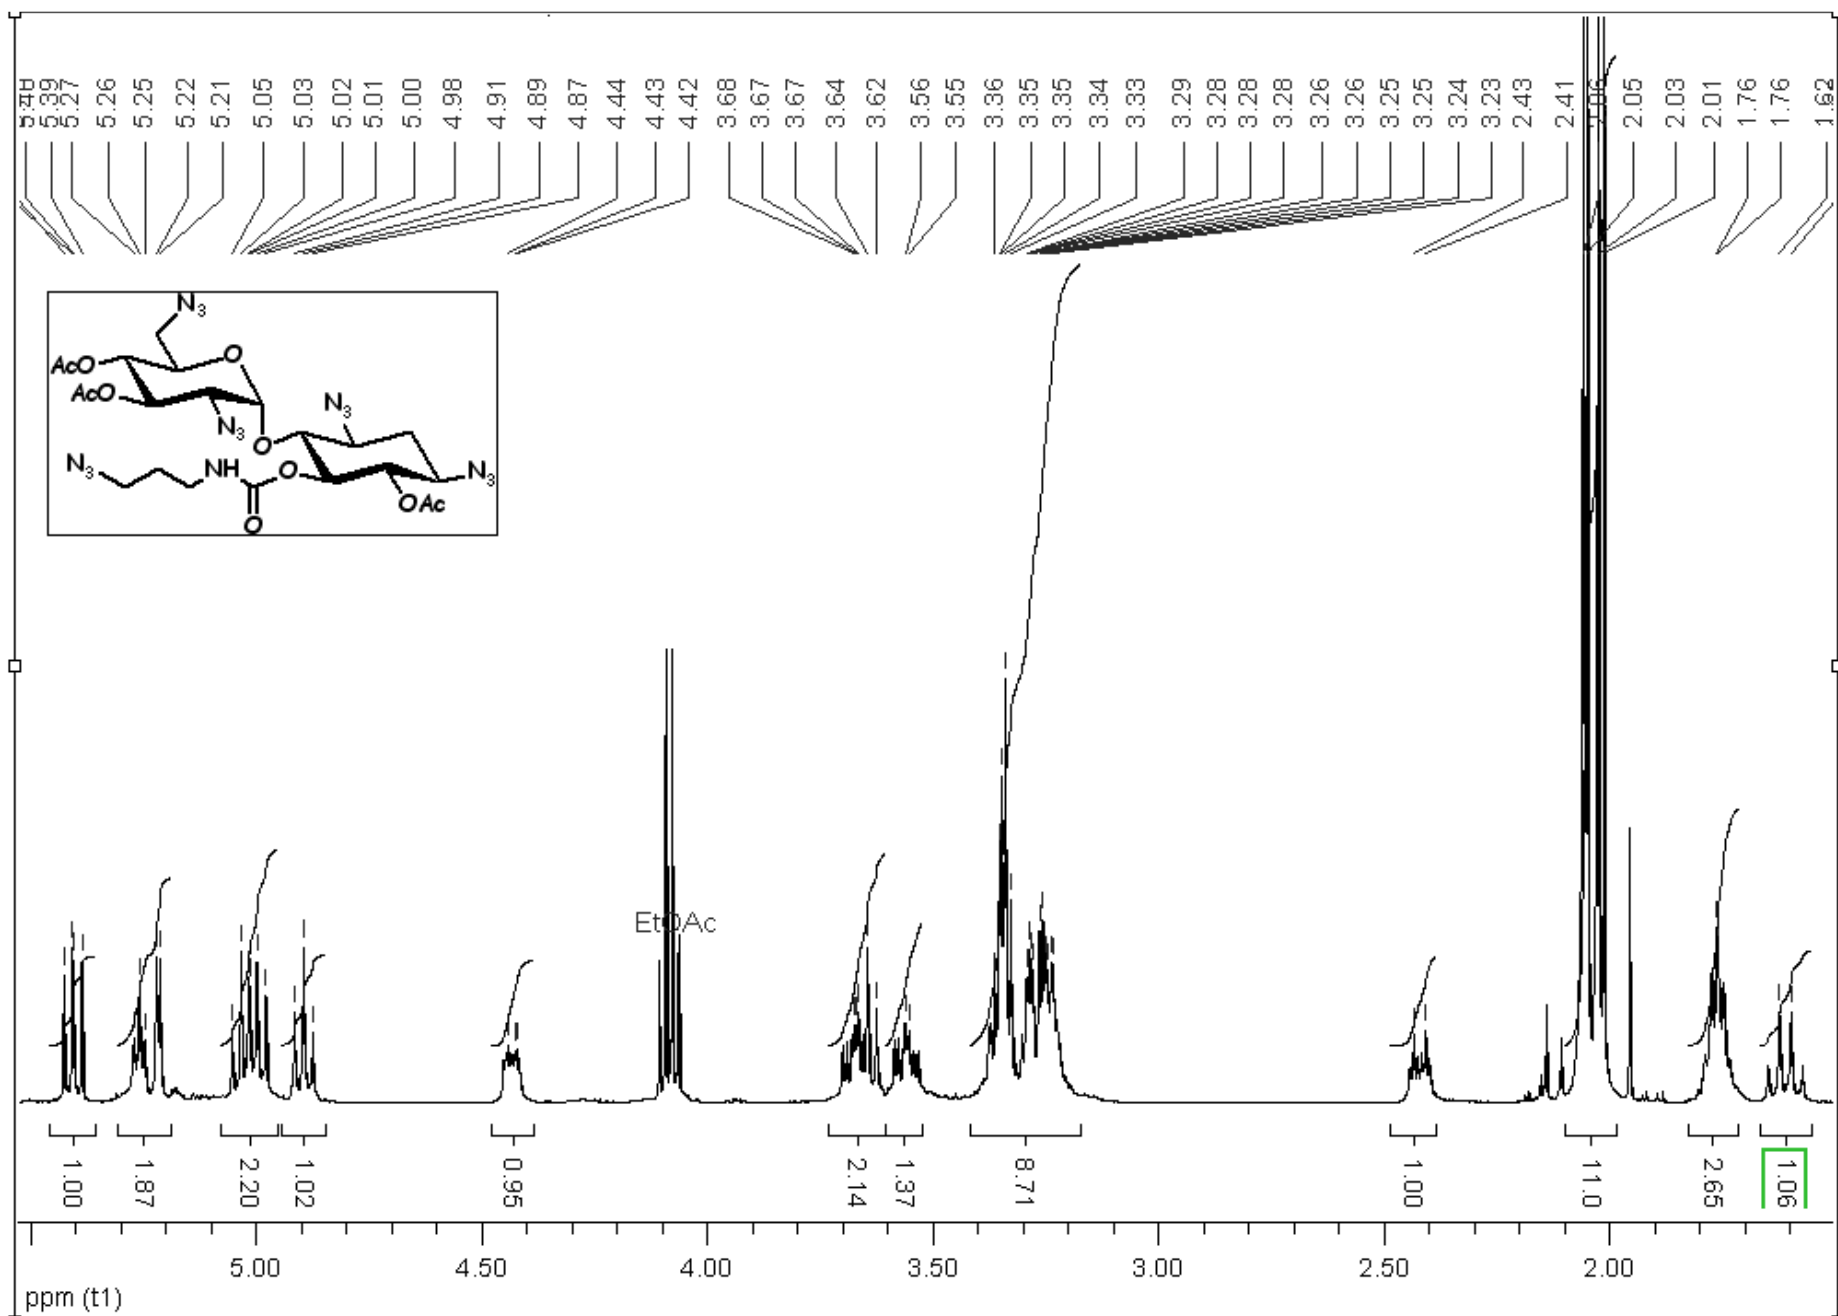

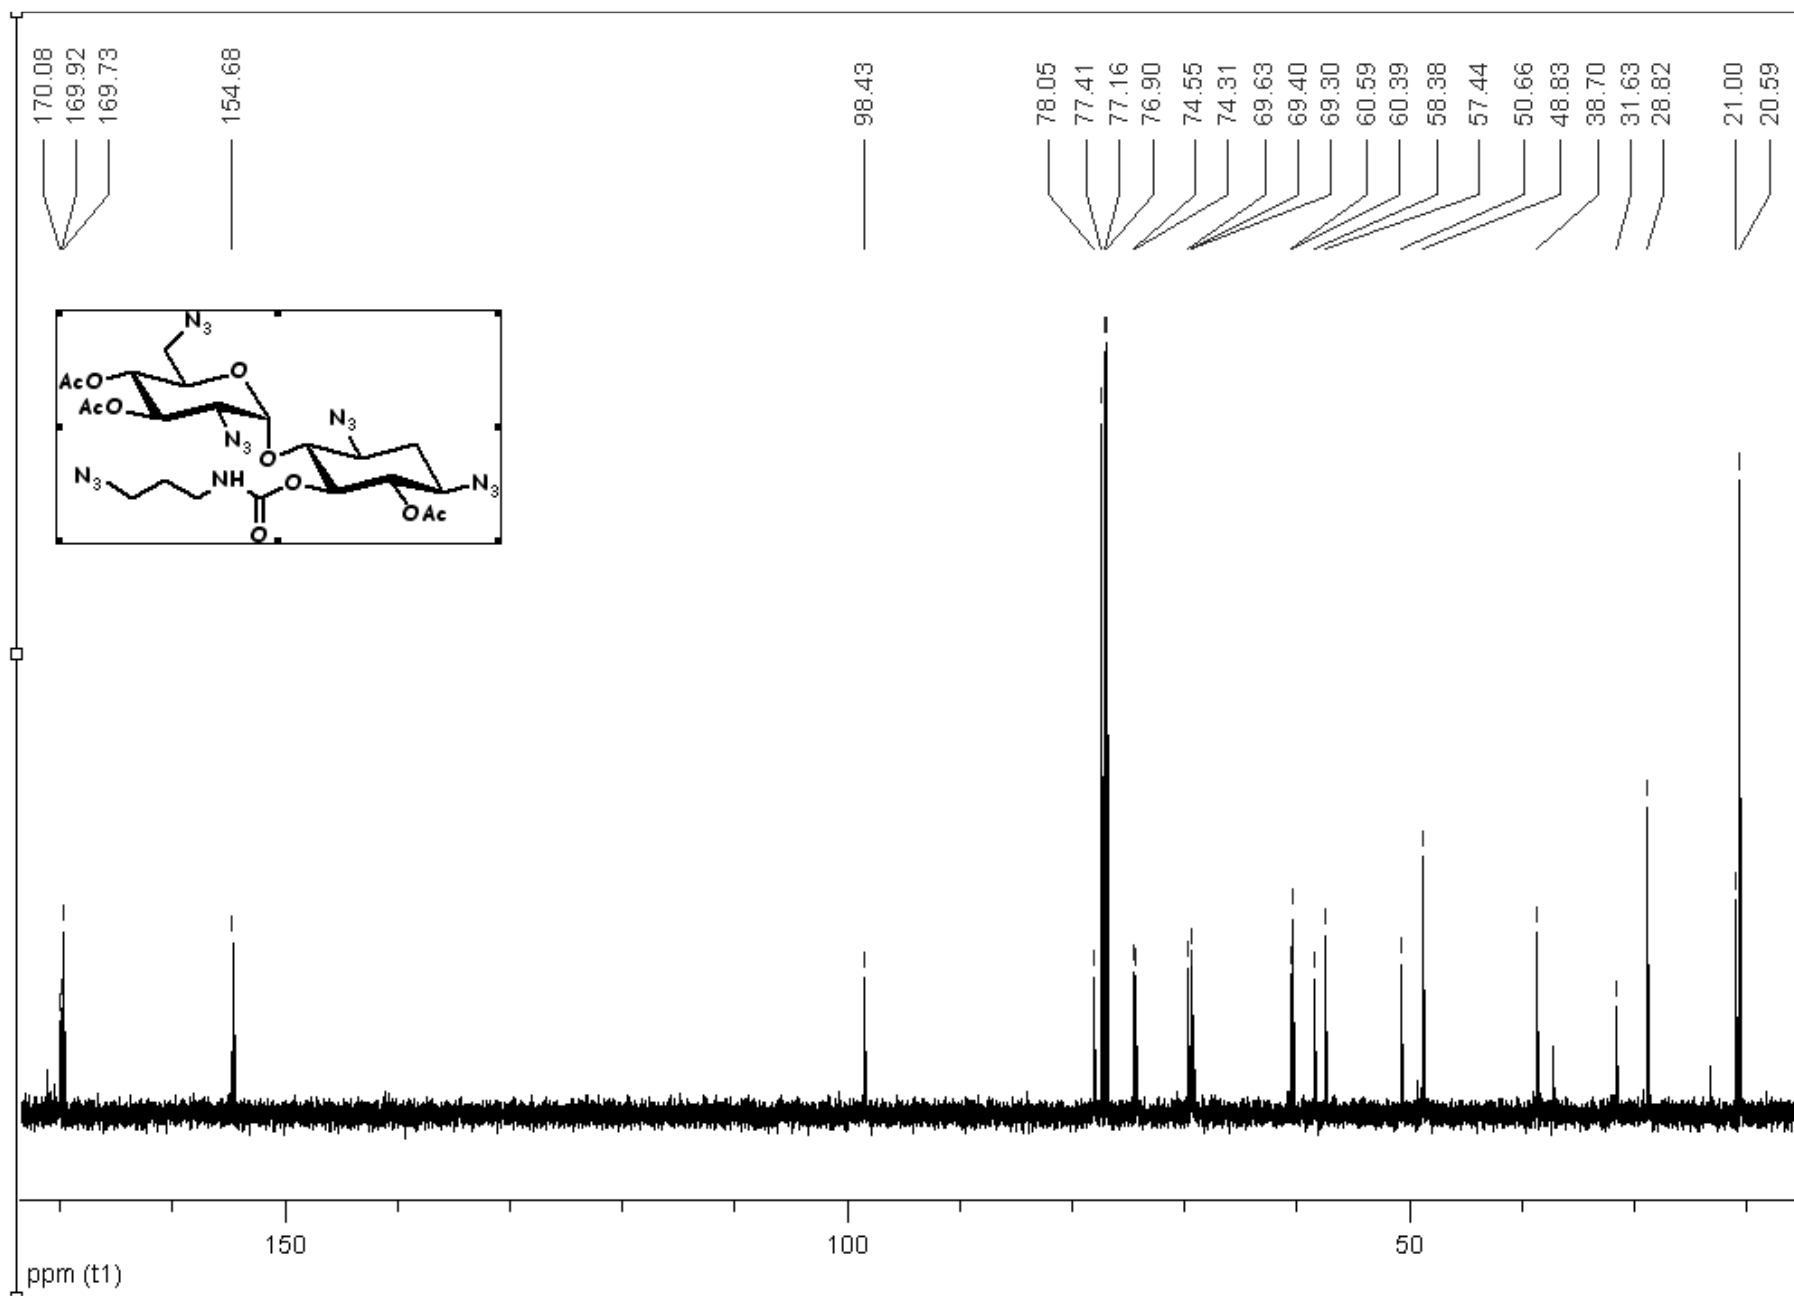



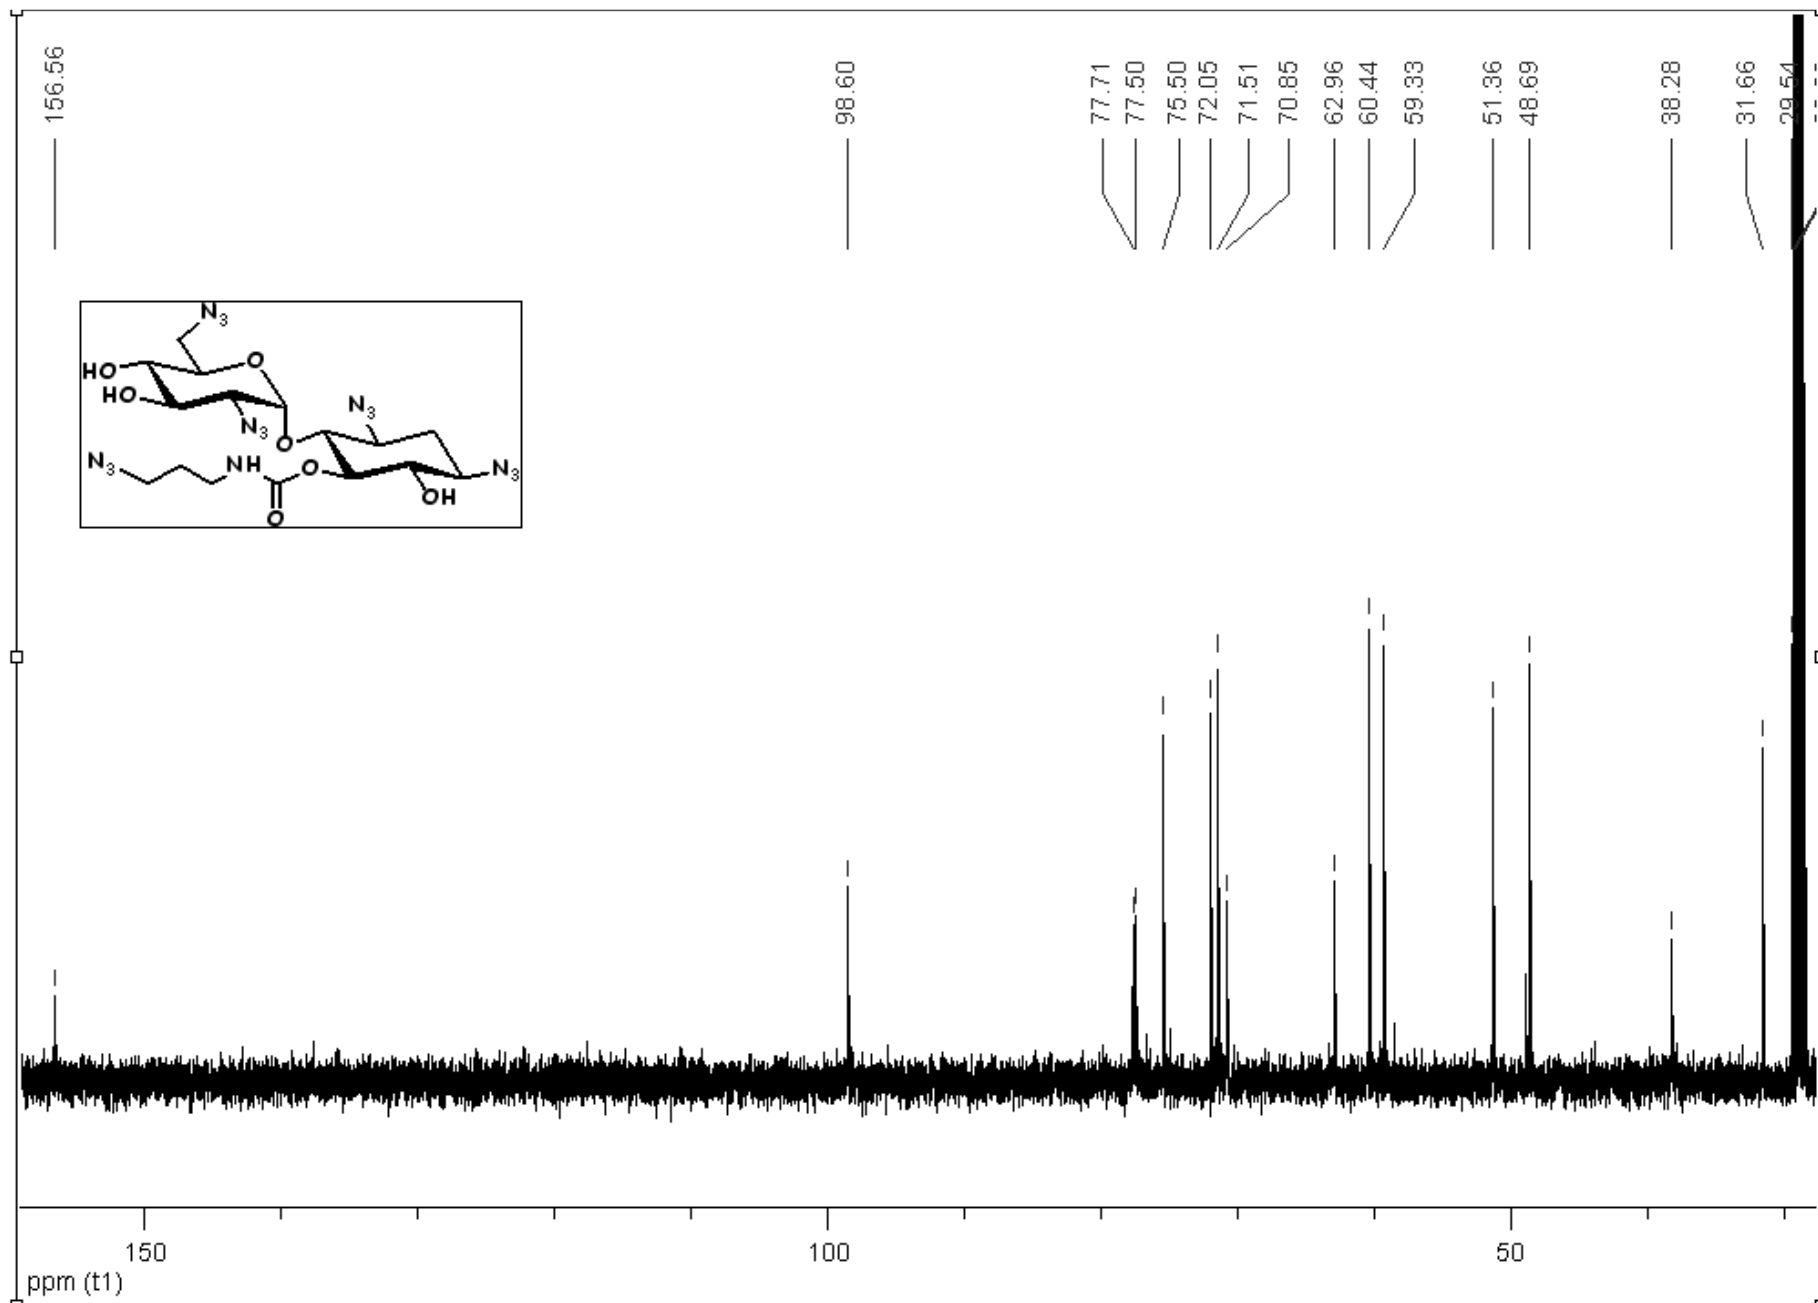



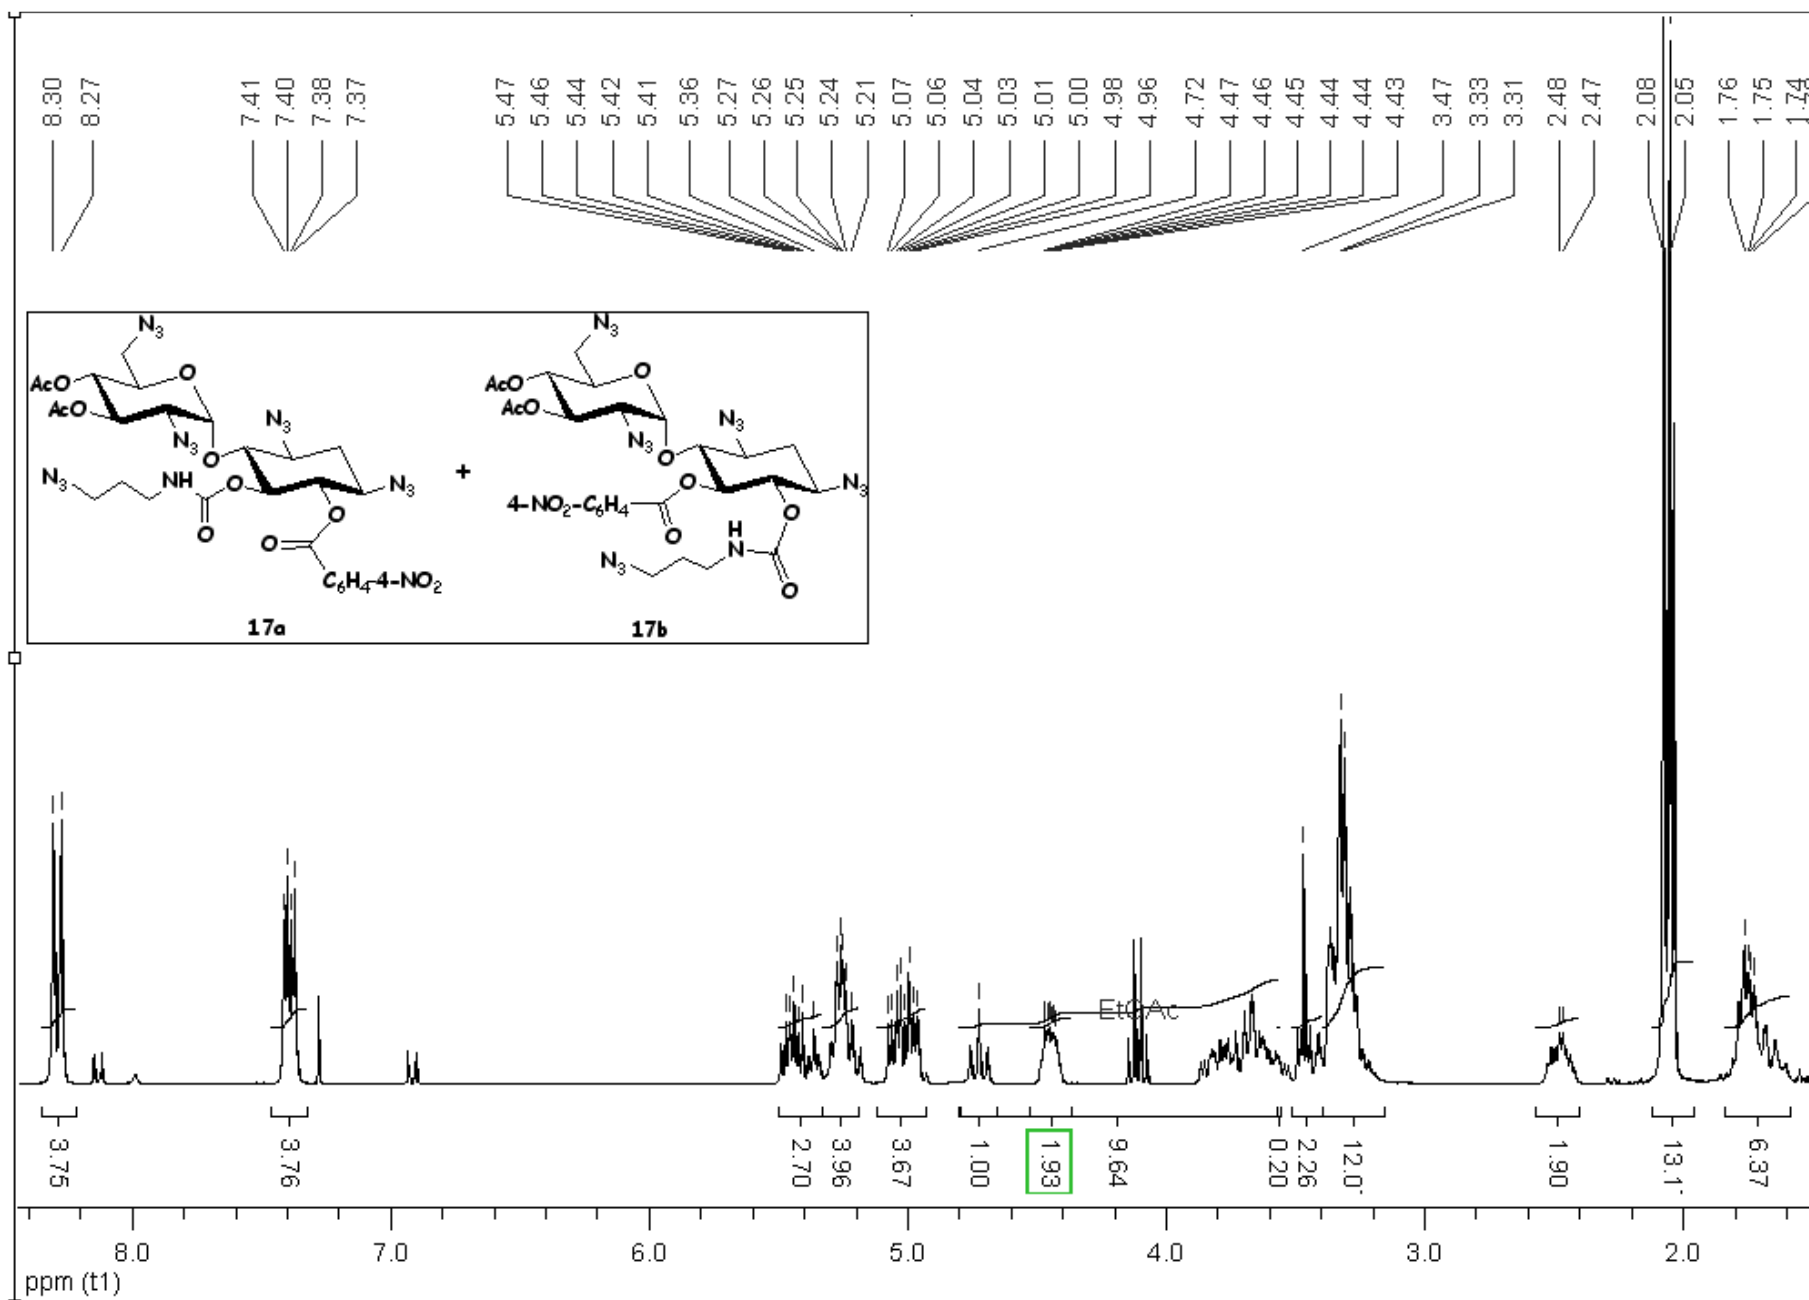

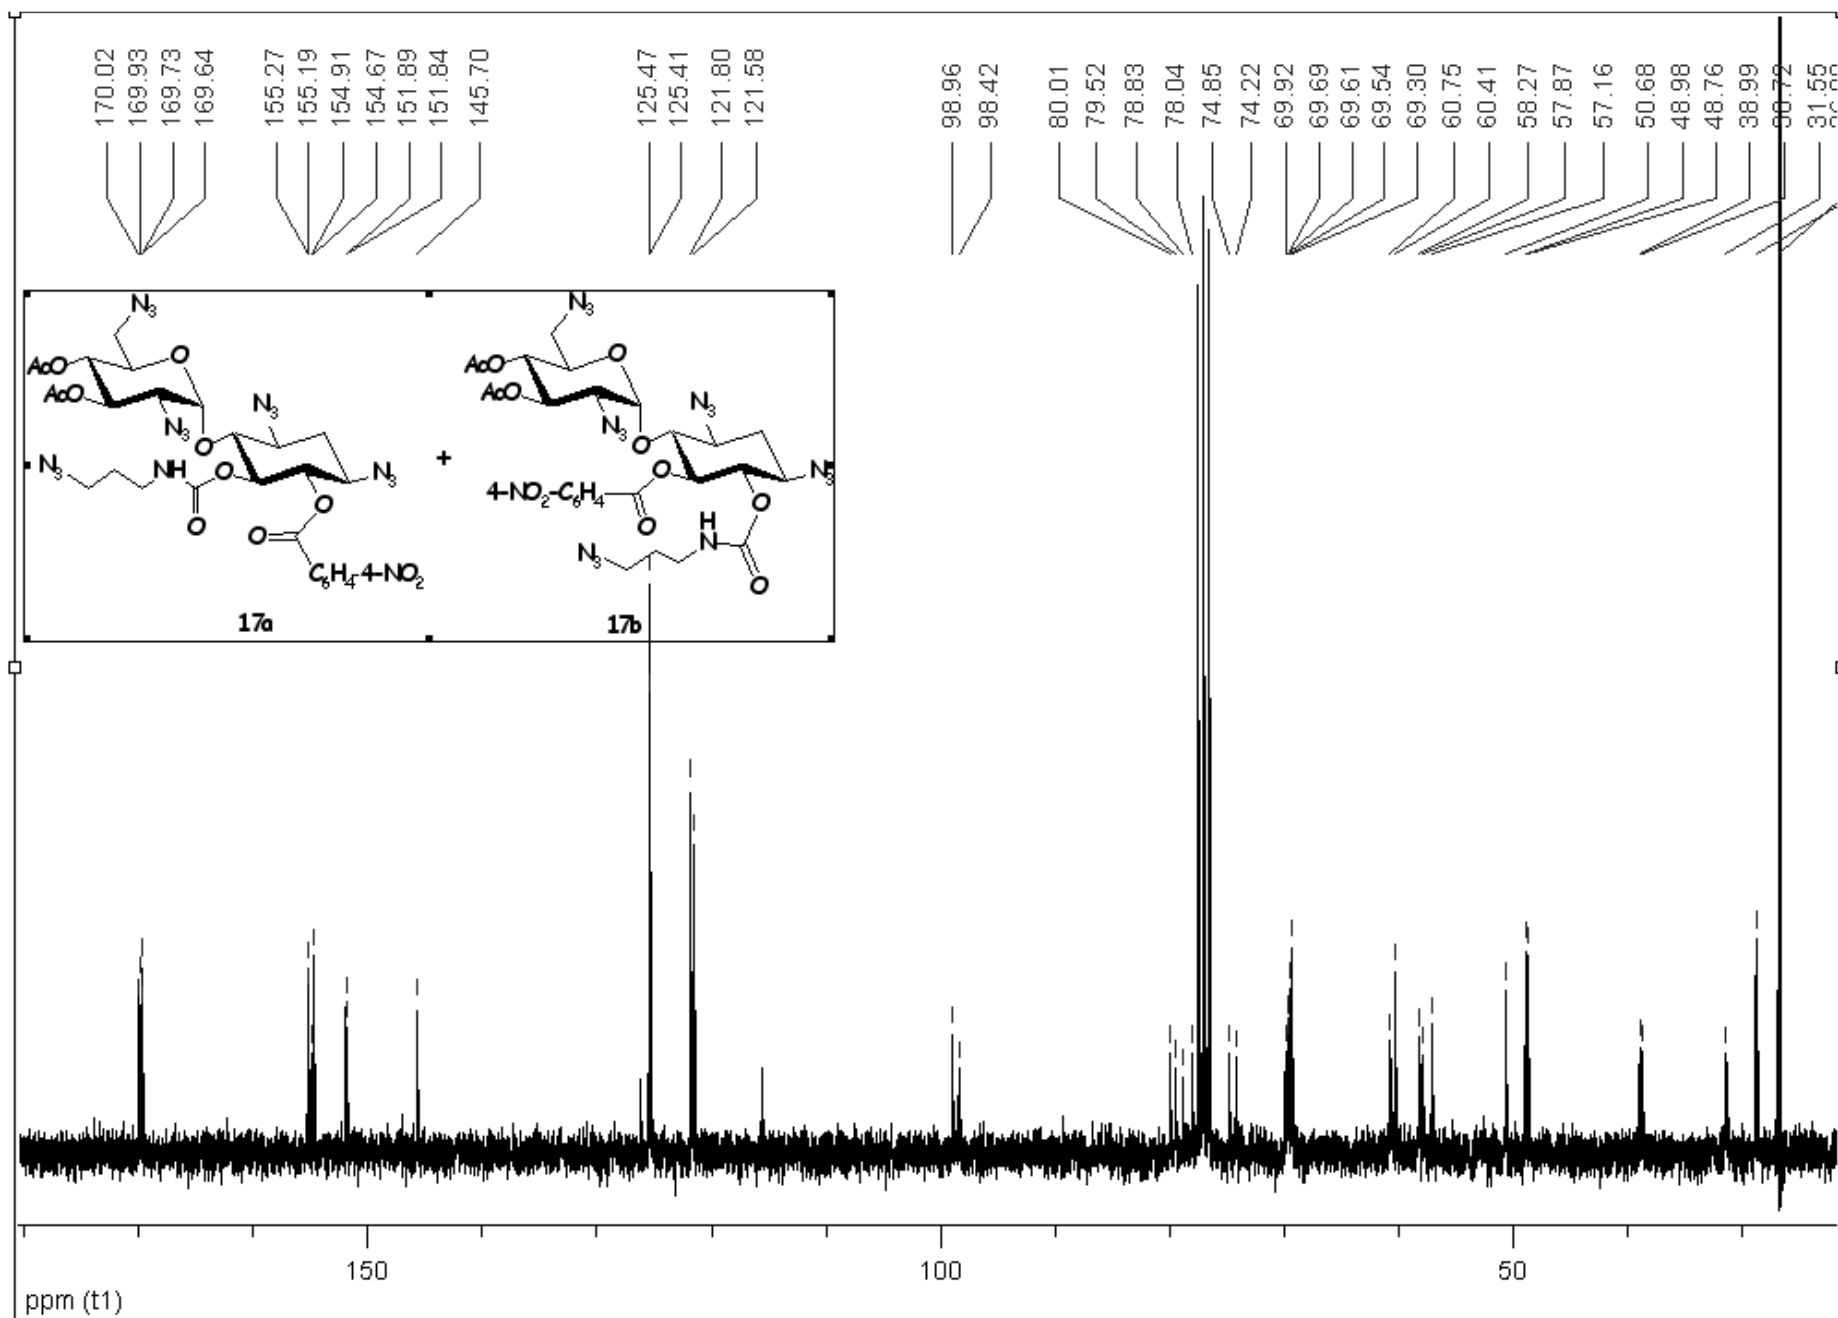

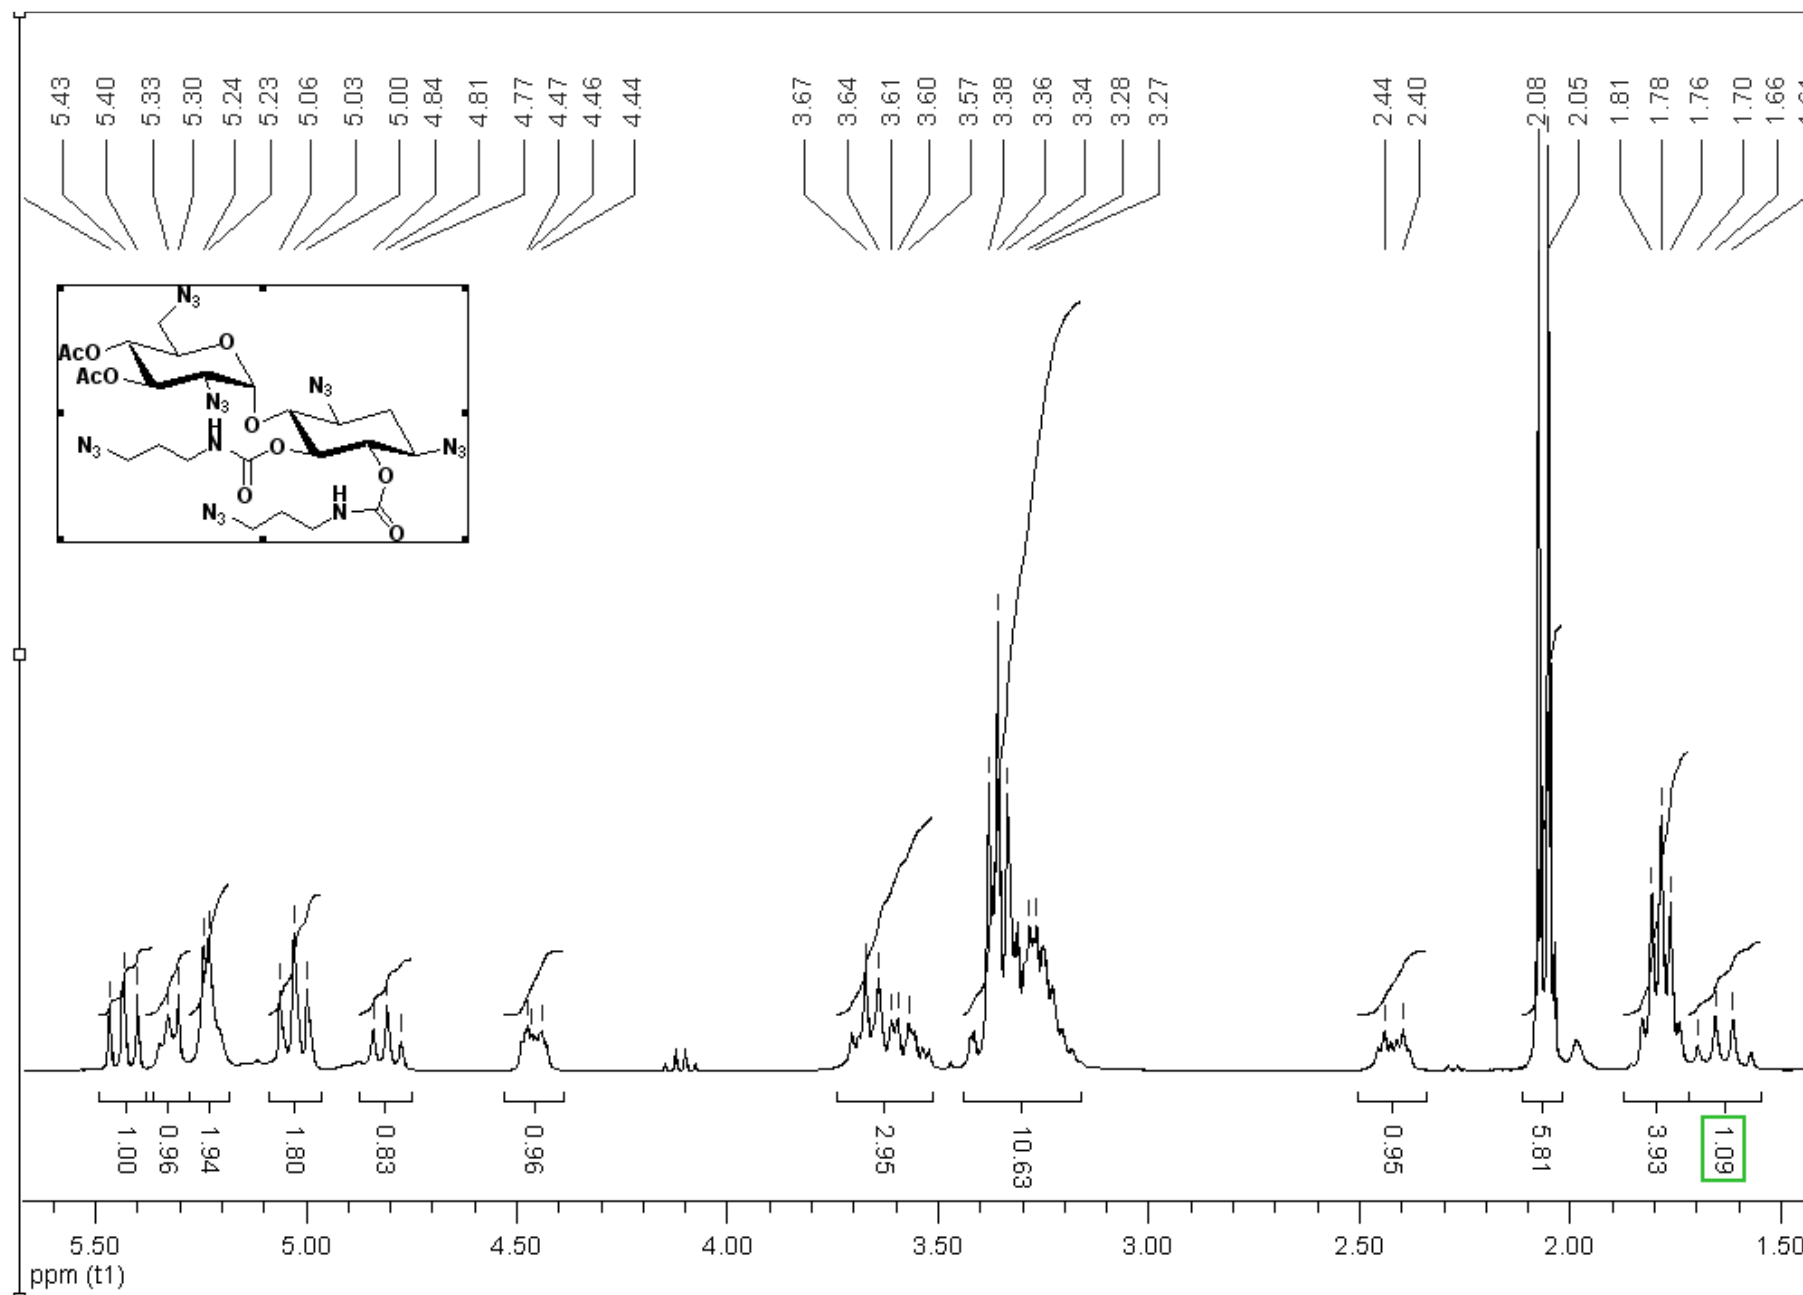



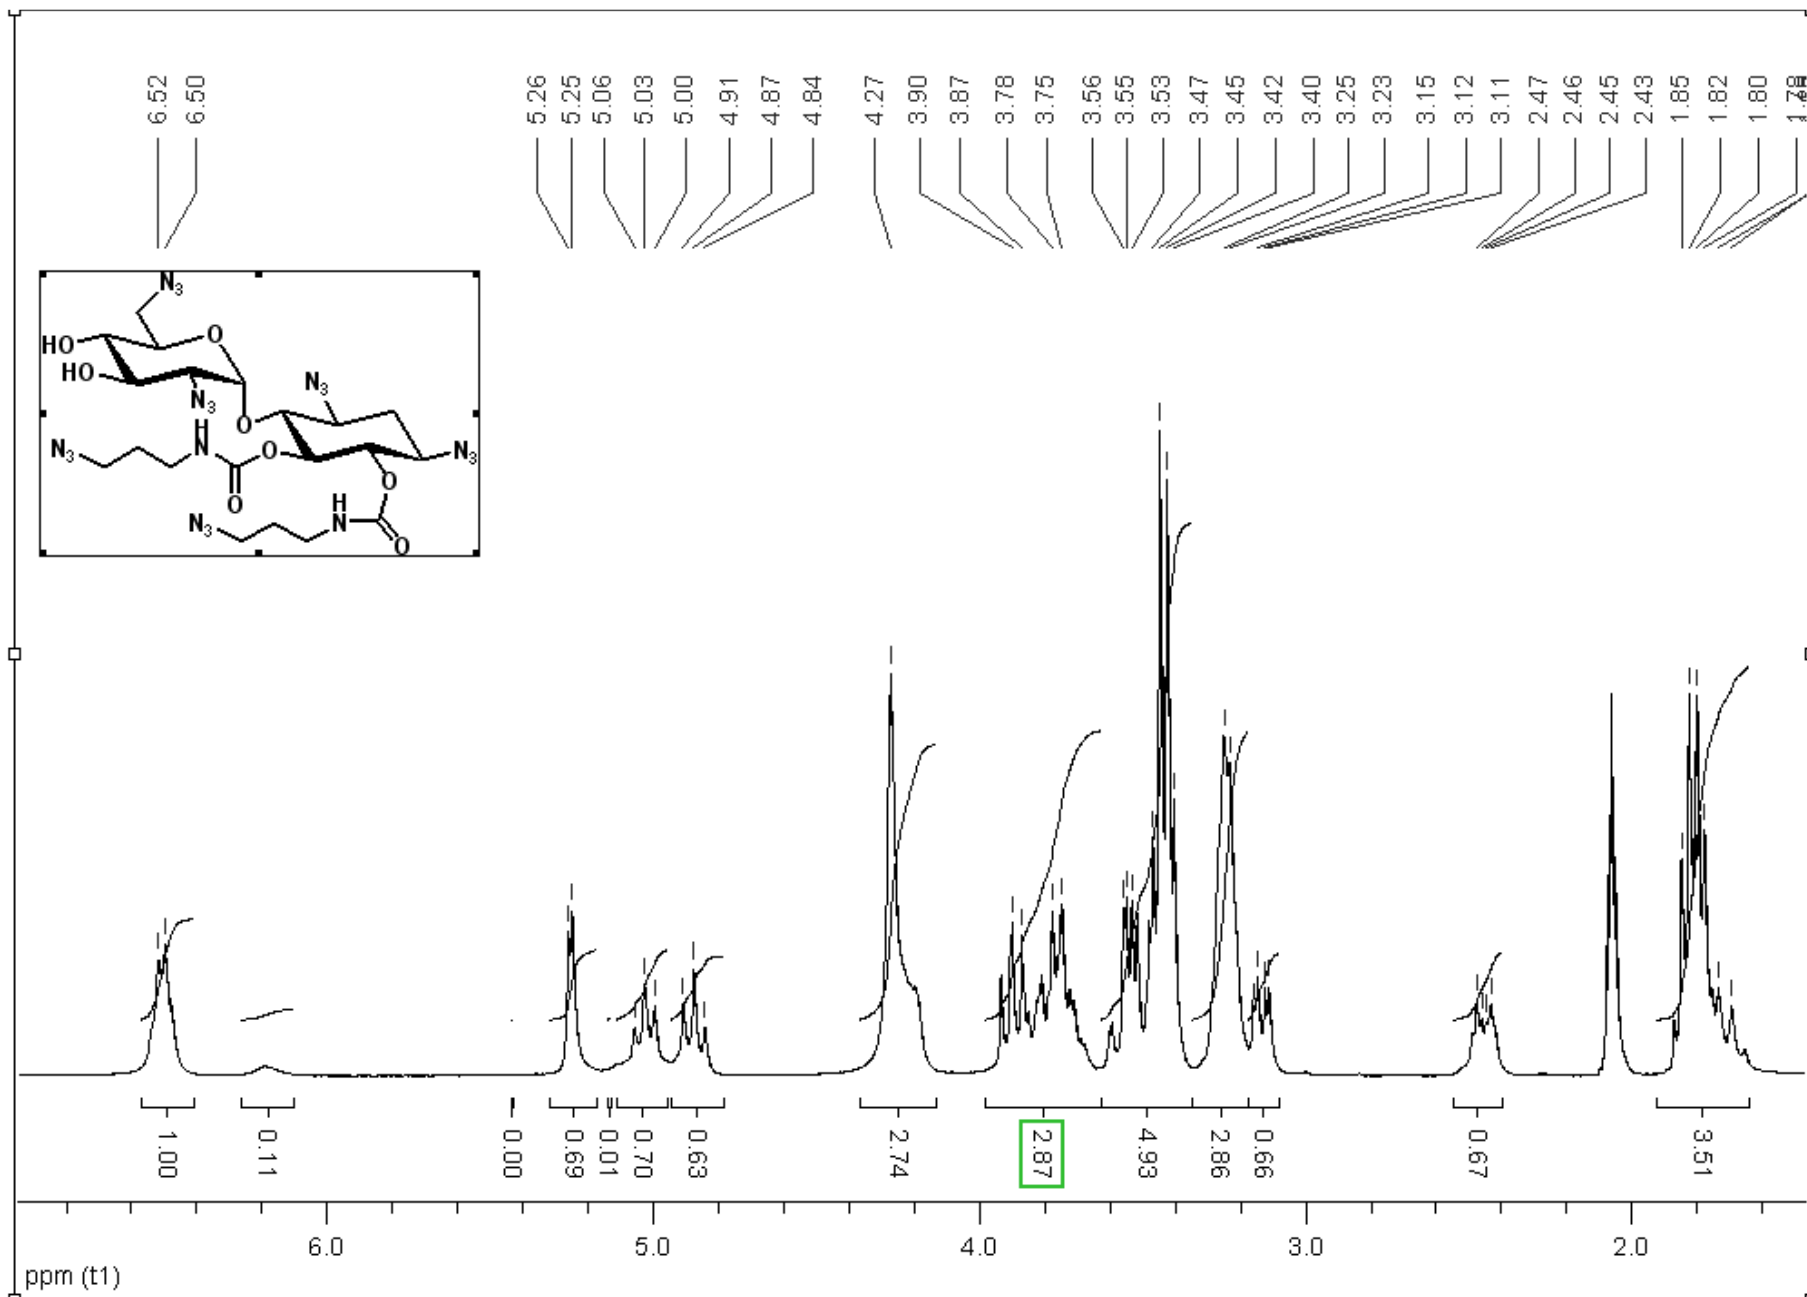

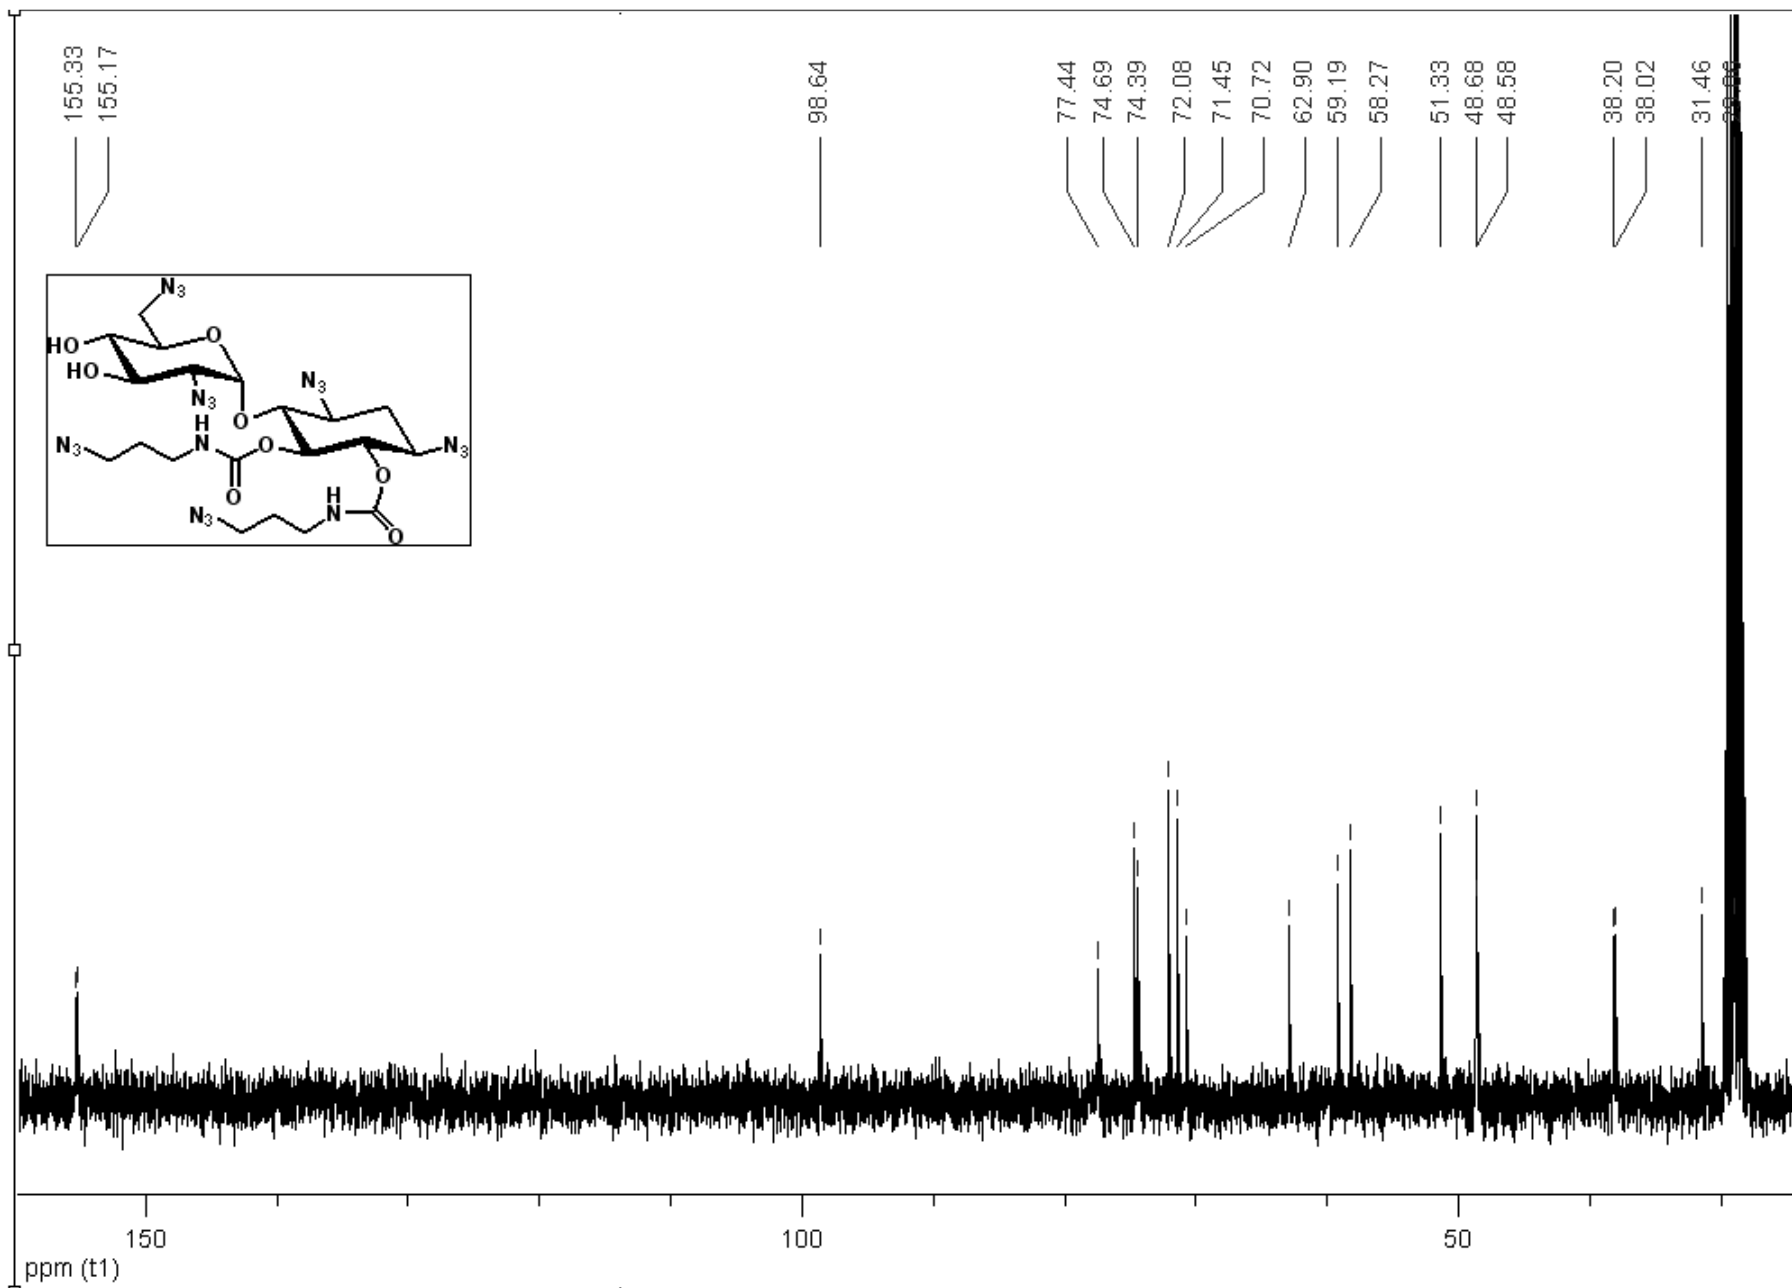

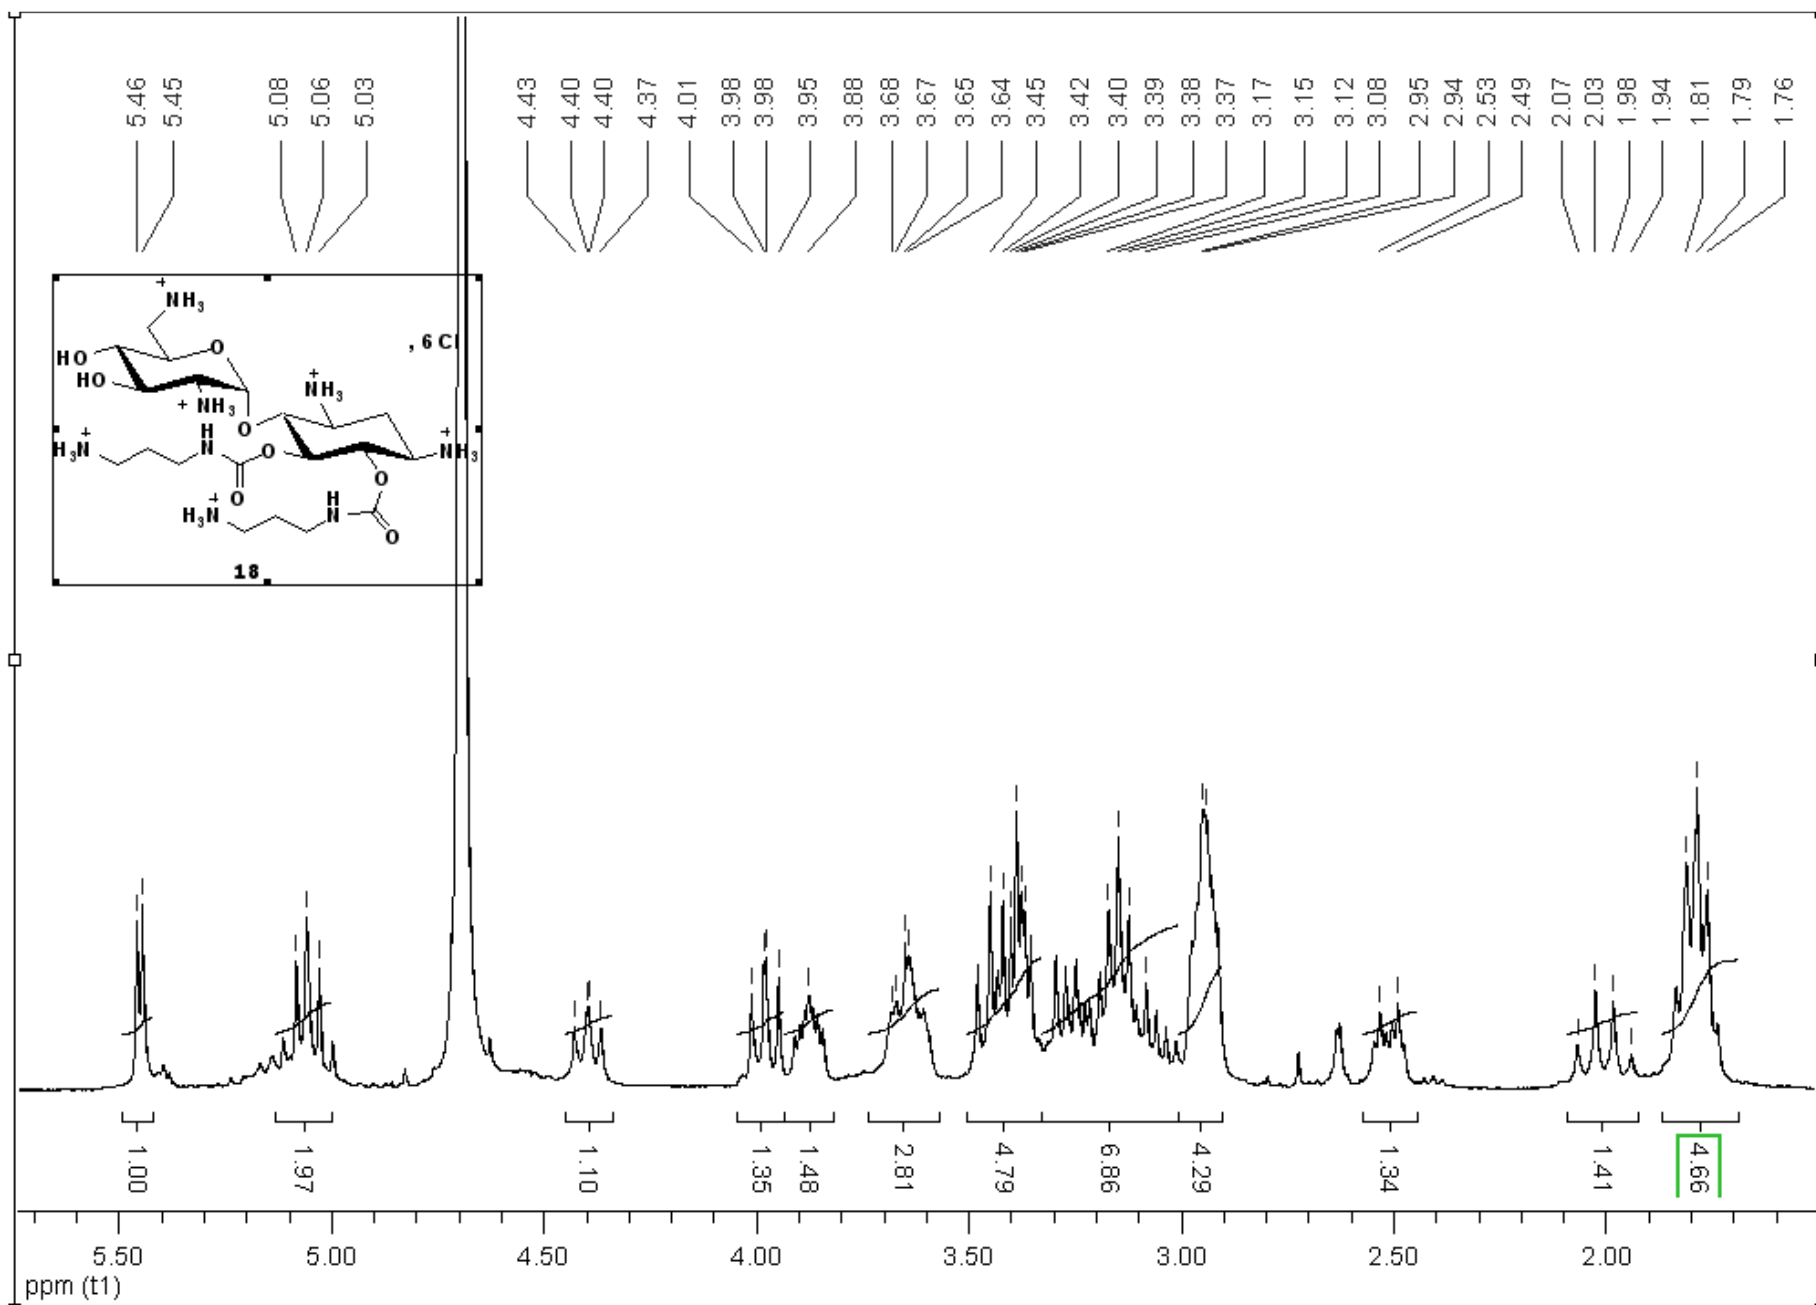

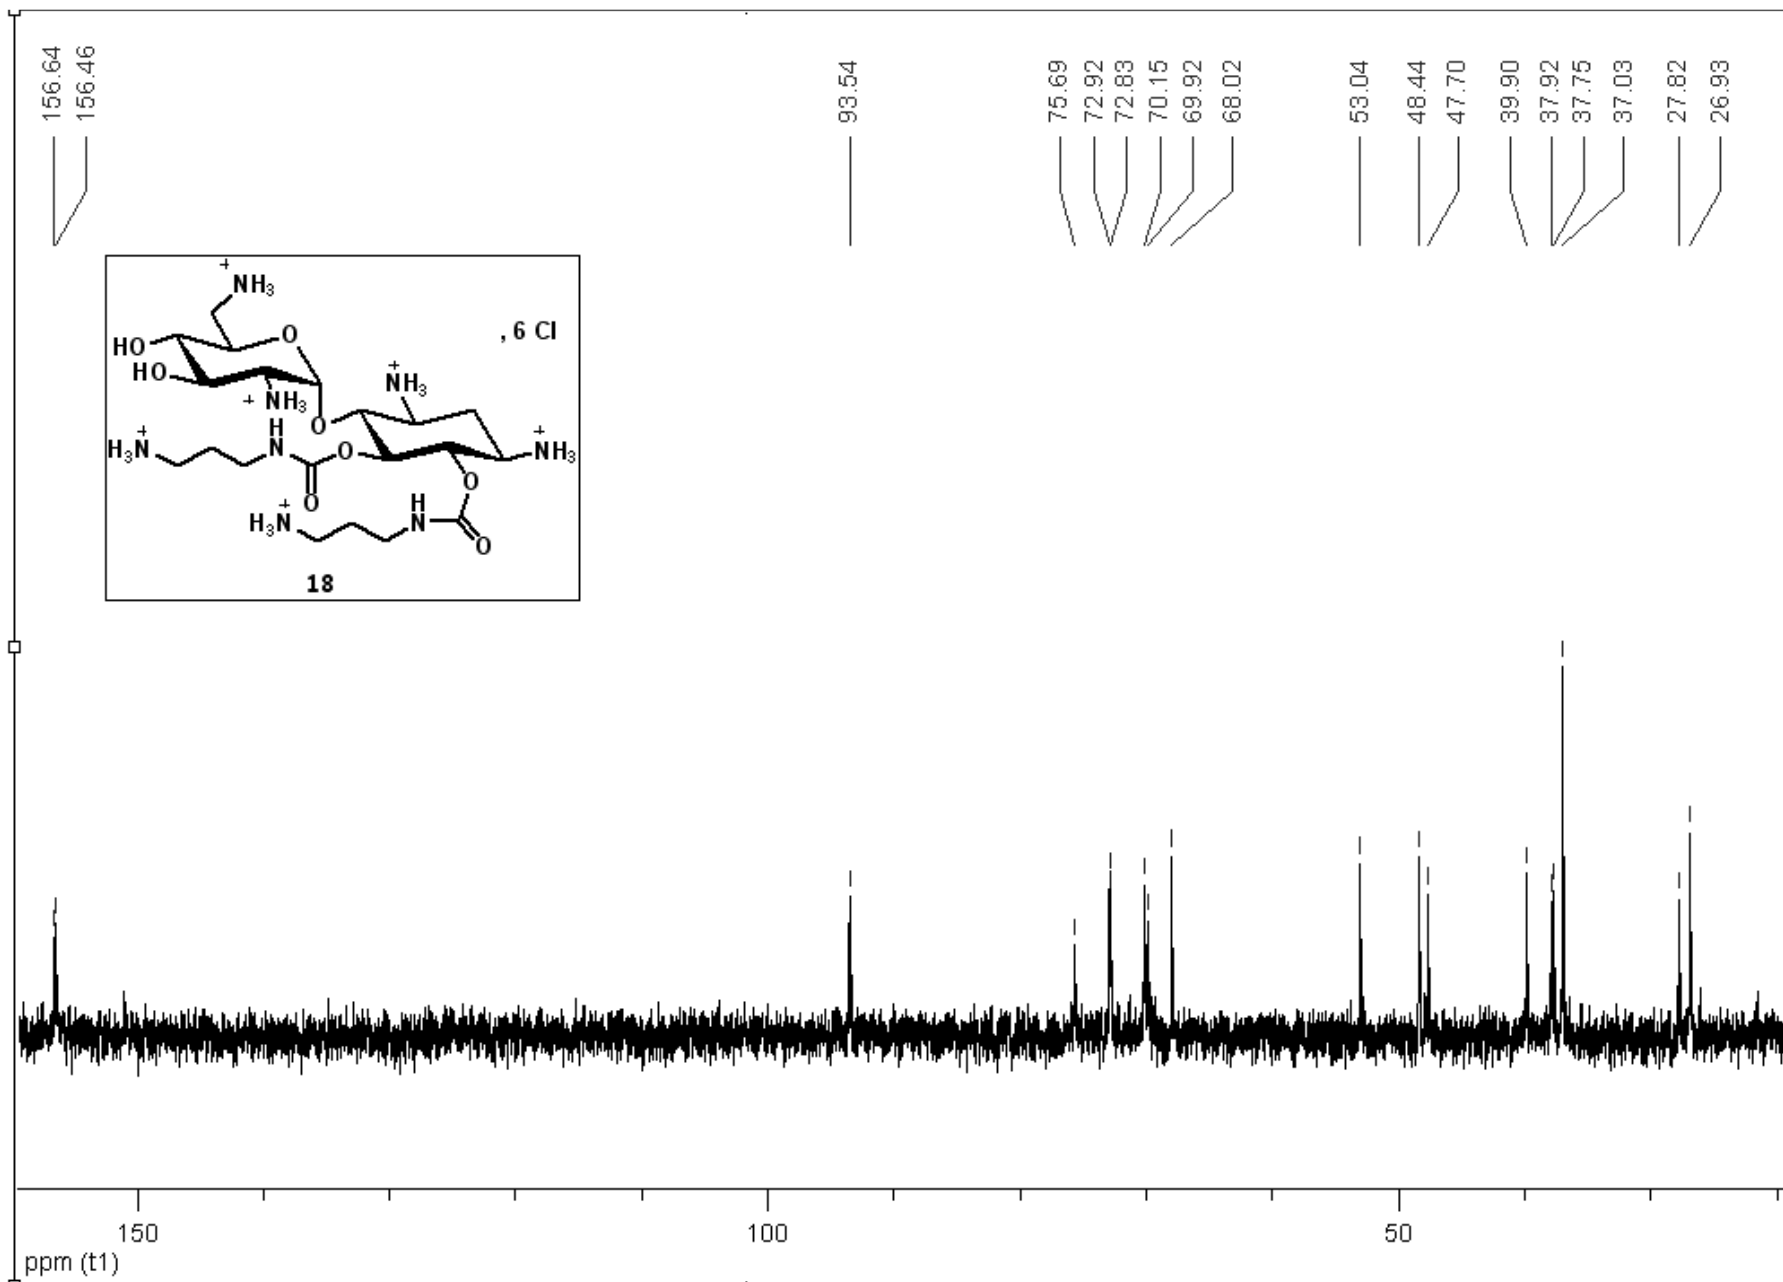

Supplement: c2ob07065k.pdf [file c2ob07065k.pdf]
